# Supplementary material for: Visible-light-induced defluorinative carbonylative coupling of alkyl iodides with α-trifluoromethyl substituted styrenes
Source: Royal Society of Chemistry journal article supplement (doi:10.1039/d2ob00916a), 2022-01-01

# Supporting Information

## Visible-Light-Induced Defluorinative Carbonylative Coupling of Alkyl Iodides with $\alpha$ -Trifluoromethyl Substituted Styrenes

Bo Chen,<sup>a</sup> Kai Yu,<sup>b</sup> and Xiao-Feng Wu<sup>\*a,c</sup>

<sup>a</sup> Dalian National Laboratory for Clean Energy, Dalian Institute of Chemical Physics, Chinese Academy of Sciences, 116023 Dalian, Liaoning, China, E-mail: xwu2020@dicp.ac.cn

<sup>b</sup> Shenyang Gold Jyouki Technology Co., Ltd. 110023 Fushun, China

<sup>c</sup> Leibniz-Institut für Katalyse e.V., Albert-Einstein-Str. 29a, 18059 Rostock, Germany, E-mail: Xiao-Feng.Wu@catalysis.de

|                                                     |     |
|-----------------------------------------------------|-----|
| <b>1 General information</b> .....                  | S2  |
| <b>2. Optimization of reaction conditions</b> ..... | S3  |
| <b>3. General procedure</b> .....                   | S5  |
| <b>4. Failed examples</b> .....                     | S7  |
| <b>5. Spectroscopic data of products</b> .....      | S8  |
| <b>6. Copies of NMR spectra for compounds</b> ..... | S32 |

## 1 General information

### Reagents, solvents and analytical methods:

Unless otherwise noted, all reactions were carried out under a carbon monoxide or nitrogen atmosphere. All the  $\alpha$ -trifluoromethyl substituted arylalkenes<sup>[1]</sup> and some alkyl iodides<sup>[2]</sup>: **2v**, **2w**, **2x**, **2y**, **2z** were synthesized by related references. All solvents were dried by standard techniques, and distilled prior to use. Column chromatography was performed on silica gel (200-300 meshes) using petroleum ether (b. p. 30-60 °C) and ethyl acetate as eluent. <sup>1</sup>H, and <sup>13</sup>C spectra were taken on Bruker AVANCE III 400 or 700 MHz spectrometers, <sup>19</sup>F NMR was taken on Oxford instrument X-pulse 60 MHz and CDCl<sub>3</sub> (<sup>1</sup>H NMR  $\delta$  7.26, <sup>13</sup>C NMR  $\delta$  77.0) as solvent. All coupling constants (*J*) are reported in Hz with the following abbreviations: s = singlet, d = doublet, dd = double doublet, t = triplet, dt = double triplet, q = quatrilplet, m = multiplet, br = broad. Light source was from CEL-PE300L-3A (325w). Gas chromatography (GC) analyses were performed on an Agilent HP-7890A instrument with a FID detector and HP-5 capillary column (polydimethylsiloxane with 5% phenyl groups, 30 m, 0.32 mm i.d. 0.25  $\mu$ m film thickness) using argon as carrier gas. Gas chromatography mass spectrometer (GC-MS) analyses were performed on a Shimadzu QP2020 NX instrument. High resolution mass spectra (HRMS) were recorded on Agilent Q-TOF 6540. Because of the high toxicity of carbon monoxide, all of the reactions should be performed in an autoclave. The laboratory should well-equipped with a CO detector and alarm system.

[1] R.-Q. Pan, X.-X. Liu and M.-Z. Deng, *J. Fluorine Chem.* 1999, **95**, 167-170.

[2] J. E. Baldwin, L. Bischoff, T. D.W. Claridge, F. A. Heupel, D. R. Spring and R. C. Whitehead, *Tetrahedron* 1997, **53**, 2271-2290.

## 2. Optimization of reaction conditions

### Screen for solvents<sup>a</sup>

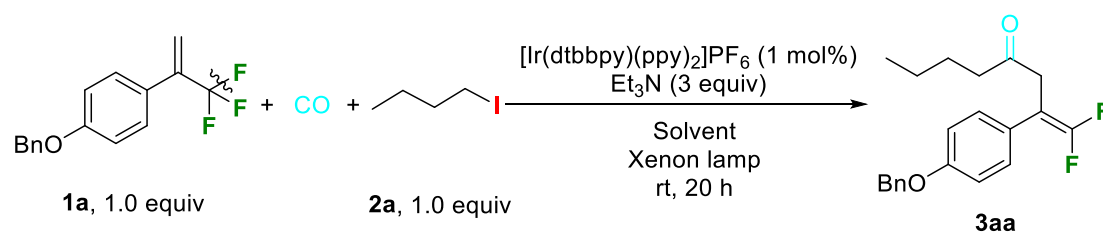

| Entry          | Solvent                     | Yield % <sup>b</sup> |
|----------------|-----------------------------|----------------------|
| 1              | MeCN                        | 20                   |
| 2              | DCE                         | 1                    |
| 3              | DMSO                        | 0                    |
| 4              | EA                          | 7                    |
| 5              | MeCN + 10% H <sub>2</sub> O | 35                   |
| 6 <sup>c</sup> | MeCN + 10% H <sub>2</sub> O | 21                   |

a) Reaction conditions: **1a** (0.10 mmol, 1.0 equiv), **2a** (0.10 mmol, 1.0 equiv),  $[\text{Ir}(\text{dtbbpy})(\text{ppy})_2]\text{PF}_6$  (1 mol%),  $\text{Et}_3\text{N}$  (0.30 mmol, 3.0 equiv), and MeCN (1.0 mL) under CO (60 bar) and stirred at rt for 20 h under Xenon lamp irradiation. b) The yields were determined by GC using hexadecane as the internal standard. c) **2a** (0.15 mmol).

### Screen for photocatalyst<sup>a</sup>

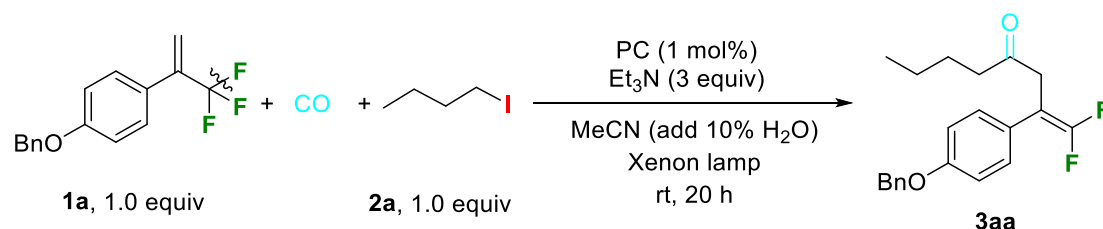

| Entry          | Photocatalyst                                                     | Yield % <sup>b</sup> |
|----------------|-------------------------------------------------------------------|----------------------|
| 1              | <i>fac</i> -Ir(ppy) <sub>3</sub>                                  | 6                    |
| 2              | (Ir[dF(CF <sub>3</sub> )ppy] <sub>2</sub> (dtbpy))PF <sub>6</sub> | 47                   |
| 3              | Ru(bpy) <sub>2</sub> (PF <sub>6</sub> ) <sub>2</sub>              | 9                    |
| 4 <sup>c</sup> | Phenol Red                                                        | 0                    |
| 5 <sup>c</sup> | Eosin Y                                                           | 0                    |
| 6 <sup>c</sup> | Rhodamine B                                                       | 0                    |
| 7 <sup>c</sup> | Methylene Blue                                                    | 0                    |

a) Reaction conditions: **1a** (0.10 mmol, 1.0 equiv), **2a** (0.10 mmol, 1.0 equiv), PC (1 mol%),  $\text{Et}_3\text{N}$  (0.30 mmol, 3.0 equiv), and MeCN (1.0 mL, add 10 % H<sub>2</sub>O) under CO (60 bar) and stirred at rt for 20 h under Xenon lamp irradiation. b) The yields were determined by GC using hexadecane as the internal standard. c) photocatalyst (5 mol%).

### Screen for the amount of water<sup>a</sup>

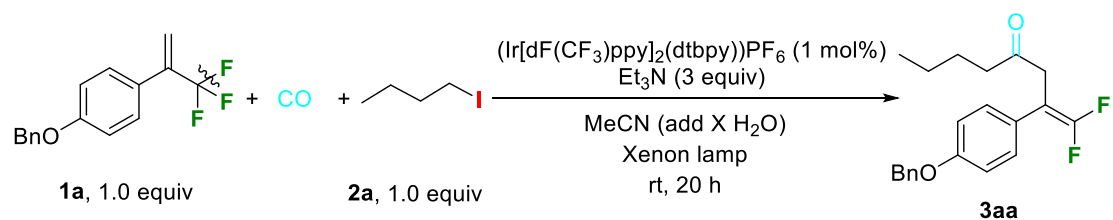

| Entry | Addition of water                     | Yield % <sup>b</sup> |
|-------|---------------------------------------|----------------------|
| 1     | 1 mL MeCN + 0.2 mL H <sub>2</sub> O   | 38                   |
| 2     | 1 mL MeCN + 0.4 mL H <sub>2</sub> O   | 33                   |
| 3     | 1 mL MeCN + 1.0 mL H <sub>2</sub> O   | 28                   |
| 4     | 0.5 mL MeCN + 1.0 mL H <sub>2</sub> O | 26                   |
| 5     | 0.1 mL MeCN + 1.0 mL H <sub>2</sub> O | 7                    |

a) Reaction conditions: **1a** (0.10 mmol, 1.0 equiv), **2a** (0.10 mmol, 1.0 equiv), (Ir[dF(CF<sub>3</sub>)ppy]<sub>2</sub>(dtbbpy))PF<sub>6</sub> (1 mol%), Et<sub>3</sub>N (0.30 mmol, 3.0 equiv) and solvent under CO (60 bar) and stirred at rt for 20 h under Xenon lamp irradiation. b) The yields were determined by GC using hexadecane as the internal standard.

### Screen for other factors<sup>a</sup>

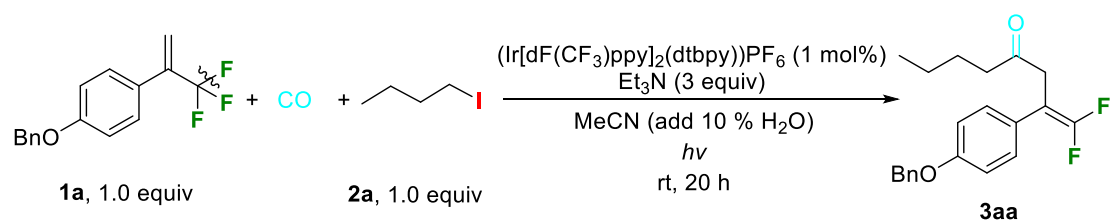

| Entry          | Light source | Yield % <sup>b</sup>  |
|----------------|--------------|-----------------------|
| 1              | Blue light   | 13                    |
| 2 <sup>d</sup> | Blue light   | 11                    |
| 3 <sup>e</sup> | Blue light   | 53                    |
| 4 <sup>f</sup> | Blue light   | 70                    |
| 5 <sup>g</sup> | Blue light   | 75 (72 <sup>c</sup> ) |

a) Reaction conditions: **1a** (0.10 mmol, 1.0 equiv), **2a** (0.10 mmol, 1.0 equiv), (Ir[dF(CF<sub>3</sub>)ppy]<sub>2</sub>(dtbbpy))PF<sub>6</sub> (1 mol%), Et<sub>3</sub>N (0.30 mmol, 3.0 equiv) and MeCN (1.0 mL add 0.1 mL H<sub>2</sub>O) under CO (60 bar) and stirred at rt for 20 h under blue light irradiation. b) The yields were determined by GC using hexadecane as the internal standard. c) Isolated yields. d) without water. e) 2.0 mL MeCN add 0.2 mL water. f) 3.0 mL MeCN add 0.3 mL water. g) 0.2 mmol scale reaction, 6.0 mL MeCN add 0.6 mL water.

### 3. General procedure

#### General procedure 1

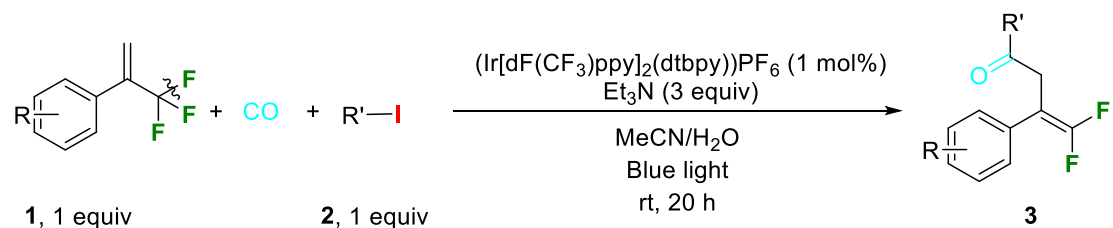

A 10 mL screw-cap vial was charged with  $\alpha$ -trifluoromethyl arylalkene (0.20 mmol), alkyl iodide (0.20 mmol), (Ir[dF(CF<sub>3</sub>)ppy]<sub>2</sub>(dtbbpy))PF<sub>6</sub> (1 mol%, 2.3 mg), Et<sub>3</sub>N (0.6 mmol, 121 mg) and an oven-dried stirring bar. The vial was closed with a Teflon septum and cap and connected to the atmosphere via a needle. After MeCN (6.0 mL) and H<sub>2</sub>O (0.6 mL) was added with a syringe under N<sub>2</sub> atmosphere, the vial was moved to an alloy plate and put into a perspective pressure reactor (500 mL) under N<sub>2</sub> atmosphere. At room temperature, the autoclave was flushed with CO three times and charged with 60 bar CO. The autoclave was placed on a magnetic stirrer. The reaction was irradiated by blue light at room temperature for 20 h. The reaction mixture was then diluted with EtOAc, filtered through silica gel with copious washings (Et<sub>2</sub>O or EtOAc), concentrated, and purified by column chromatography.

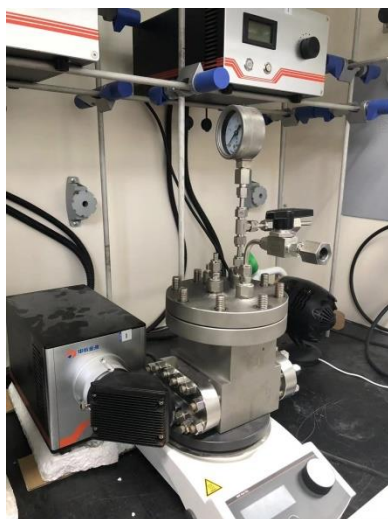

#### General procedure 2

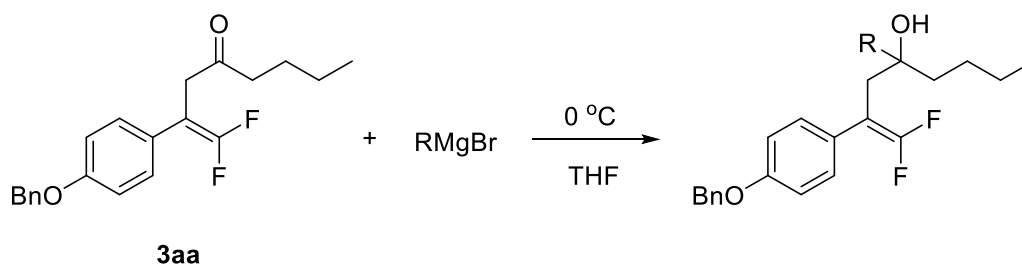

A flame dried Schlenk tube was charged with **3aa** (0.2 mmol, 69 mg) under nitrogen, and the compound was dissolved in dry THF (2.0 mL), resulting in a light yellow solution. The solution was stirred at 0 °C (ice bath). RMgBr (0.32 mmol, 0.32 mL of 1 M sol. in THF) was added dropwise over 10 min. The reaction mixture was stirred at room temperature and monitored by TLC until full conversion to the product was observed. The reaction mixture was quenched with aqueous saturated NH<sub>4</sub>Cl and

extracted with ethyl acetate (5.0 ml  $\times$  3). The organic extracts are combined, concentrated and the residue was purified by silica gel column chromatography to afford the product.

### General procedure 3

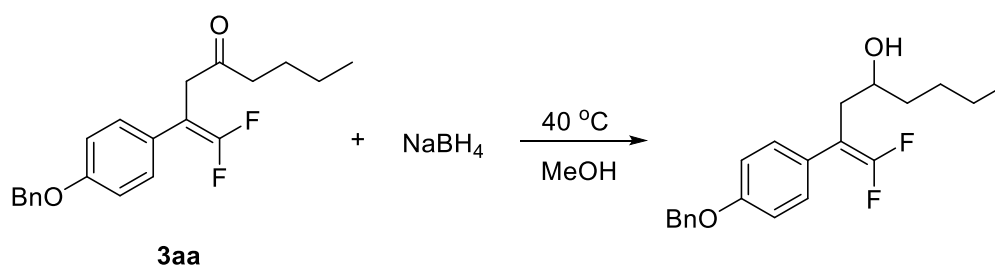

A flame dried Schlenk tube was charged with the requisite **3aa** (0.2 mmol, 69 mg), MeOH (10.0 mL) and NaBH<sub>4</sub> (0.4 mmol, 31 mg). The reaction mixture was stirred for 6 h at 40 °C. and monitored by TLC until full conversion to the product was observed. Then the reaction mixture was diluted with ethyl acetate, filtered and dried with NaSO<sub>4</sub>, and concentrated in vacuo. The residue was chromatographed on silica gel to afford the product.

### General procedure 4

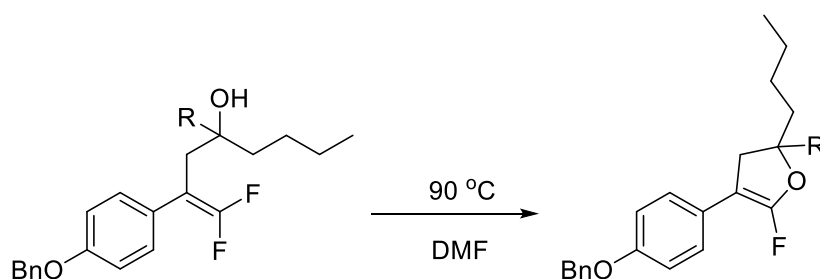

A separate flask is charged with the requisite  $\gamma,\gamma$ -difluoro allylic alcohols (0.2 mmol), DMF (2.0 mL) and NaH (7.2 mg, 0.3 mmol). The reaction mixture is then heated to 90 °C with stirring, and monitored by TLC until full conversion to the product was observed. The mixture is then cooled to room temperature, filtrated through celite, and concentrated. The residue chromatographed on silica gel to afford the product.

## 4. Failed examples

Alkyl Iodides

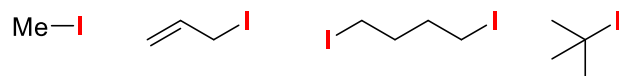

$\alpha$ -Trifluoromethyl Substituted Arylalkenes

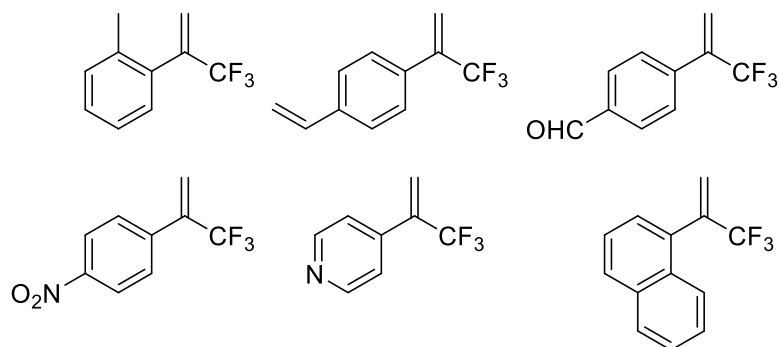

## 5. Spectroscopic data of products

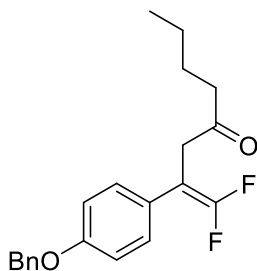

### 2-(4-(benzyloxy)phenyl)-1,1-difluorooct-1-en-4-one (3aa)

The title compound was prepared from 1-(benzyloxy)-4-(3,3,3-trifluoroprop-1-en-2-yl)benzene (55 mg, 0.20 mmol) and 1-iodobutane (37 mg, 0.20 mmol) according to general procedure 1. The crude residue was purified by flash chromatography (PE/EA = 40:1) to give the product as a colorless oil (49 mg, 72%).

**<sup>1</sup>H NMR (400 MHz, Chloroform-*d*)**  $\delta$  7.36 – 7.22 (m, 5H), 7.13 (d,  $J = 8.3$  Hz, 2H), 6.86 (d,  $J = 8.3$  Hz, 2H), 4.97 (s, 2H), 3.32 (s, 2H), 2.34 (t,  $J = 7.4$  Hz, 2H), 1.45 (p,  $J = 7.4$  Hz, 2H), 1.18 (q,  $J = 7.7$  Hz, 2H), 0.79 (t,  $J = 7.3$  Hz, 3H).

**<sup>13</sup>C NMR (101 MHz, CDCl<sub>3</sub>)**  $\delta$  207.0 (dd,  $J = 2.8, 3.0$  Hz), 158.1, 154.6 (dd,  $J = 294.1, 290.7$  Hz), 136.8, 130.1, 129.1 (t,  $J = 3.2$  Hz), 128.6, 128.1, 127.5, 125.6 (t,  $J = 3.2$  Hz), 115.0, 86.8 (dd,  $J = 21.8, 22.1$  Hz), 70.0, 42.3 (d,  $J = 2.0$  Hz), 41.7, 25.7, 22.2, 13.8.

**<sup>19</sup>F NMR (376 MHz, Chloroform-*d*)**  $\delta$  -89.1 (d,  $J = 39.0$  Hz), -90.2 (d,  $J = 39.0$  Hz).

**HRMS (ESI-TOF)**  $m/z$ : [M + H]<sup>+</sup> Calcd for C<sub>21</sub>H<sub>22</sub>F<sub>2</sub>O<sub>2</sub> 345.1661; Found: 345.1660.

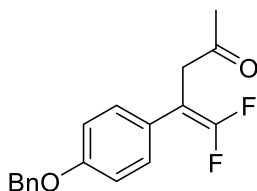

### 4-(4-(benzyloxy)phenyl)-5,5-difluoropent-4-en-2-one (3ab)

The title compound was prepared from 1-(benzyloxy)-4-(3,3,3-trifluoroprop-1-en-2-yl)benzene (55 mg, 0.20 mmol) and (iodomethyl)trimethylsilane (43 mg, 0.20 mmol) according to general procedure 1. The crude residue was purified by flash chromatography (PE/EA = 20:1) to give the product as a colorless oil (31 mg, 49%).

**<sup>1</sup>H NMR (400 MHz, Chloroform-*d*)**  $\delta$  7.37 – 7.28 (m, 4H), 7.27 – 7.22 (m, 1H), 7.19 – 7.12 (m, 2H), 6.91 – 6.84 (m, 2H), 4.97 (s, 2H), 3.34 (t,  $J = 2.2$  Hz, 2H), 2.07 (s, 3H).

**<sup>13</sup>C NMR (101 MHz, CDCl<sub>3</sub>)**  $\delta$  204.7 (dd,  $J = 2.2, 3.7$  Hz), 158.1, 154.6 (dd,  $J = 293.0, 293.0$  Hz), 136.8, 129.1 (t,  $J = 3.3$  Hz), 128.6, 128.1, 127.5, 125.4 (t,  $J = 4.4$  Hz), 115.0, 86.8 (dd,  $J = 21.7, 22.0$  Hz), 70.0, 43.1 (d,  $J = 2.0$  Hz), 29.2.

**<sup>19</sup>F NMR (56 MHz, Chloroform-*d*)**  $\delta$  -88.4 (d,  $J = 40.6$  Hz), -89.7 (d,  $J = 37.4$  Hz).

**HRMS (ESI-TOF)**  $m/z$ : [M + H]<sup>+</sup> Calcd for C<sub>18</sub>H<sub>16</sub>F<sub>2</sub>O<sub>2</sub> 303.1191; Found: 303.1190.



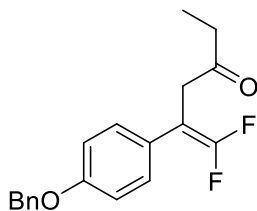

#### 5-(4-(benzyloxy)phenyl)-6,6-difluorohex-5-en-3-one (3ac)

The title compound was prepared from 1-(benzyloxy)-4-(3,3,3-trifluoroprop-1-en-2-yl)benzene (55 mg, 0.20 mmol) and iodoethane (32 mg, 0.20 mmol) according to general procedure 1. The crude residue was purified by flash chromatography (PE/EA = 40:1) to give the product as a colorless oil (37 mg, 59%).

**<sup>1</sup>H NMR (700 MHz, Chloroform-*d*)**  $\delta$  7.33 (dd,  $J$  = 21.6, 7.6 Hz, 4H), 7.25 (t,  $J$  = 7.3 Hz, 1H), 7.14 (d,  $J$  = 8.6 Hz, 2H), 6.89 – 6.84 (m, 2H), 4.98 (s, 2H), 3.34 (s, 2H), 2.38 (q,  $J$  = 7.4 Hz, 2H), 0.95 (t,  $J$  = 7.3 Hz, 3H).

**<sup>13</sup>C NMR (176 MHz, CDCl<sub>3</sub>)**  $\delta$  206.3 (dd,  $J$  = 2.0, 3.4 Hz), 157.1, 154.4 (q,  $J$  = 290.2 Hz), 135.8, 129.0, 128.0 (t,  $J$  = 3.7 Hz), 127.6, 127.0, 126.4, 124.6 (t,  $J$  = 3.8 Hz), 85.8 (dd,  $J$  = 21.9, 22.3 Hz), 69.0, 40.9 (d,  $J$  = 2.0 Hz), 34.1, 6.6.

**<sup>19</sup>F NMR (56 MHz, Chloroform-*d*)**  $\delta$  -88.7 (d,  $J$  = 38.2 Hz), -89.9 (d,  $J$  = 40.2 Hz).

**HRMS (ESI-TOF)**  $m/z$ : [M + H]<sup>+</sup> Calcd for C<sub>19</sub>H<sub>18</sub>F<sub>2</sub>O<sub>2</sub> 317.1348; Found: 317.1346.

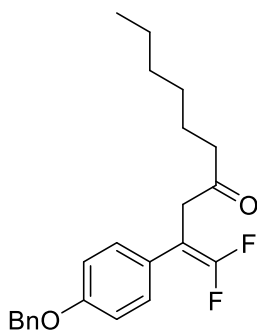

#### 2-(4-(benzyloxy)phenyl)-1,1-difluorodec-1-en-4-one (3ad)

The title compound was prepared from 1-(benzyloxy)-4-(3,3,3-trifluoroprop-1-en-2-yl)benzene (55 mg, 0.20 mmol) and 1-iodohexane (43 mg, 0.20 mmol) according to general procedure 1. The crude residue was purified by flash chromatography (PE/EA = 40:1) to give the product as a yellow oil (47 mg, 63%).

**<sup>1</sup>H NMR (700 MHz, Chloroform-*d*)**  $\delta$  7.34 (d,  $J$  = 7.1 Hz, 2H), 7.30 (t,  $J$  = 7.5 Hz, 2H), 7.24 (t,  $J$  = 7.1 Hz, 1H), 7.13 (d,  $J$  = 8.4 Hz, 2H), 6.86 (d,  $J$  = 8.8 Hz, 2H), 4.96 (s, 2H), 3.32 (s, 2H), 2.33 (t,  $J$  = 7.4 Hz, 2H), 1.45 (dd,  $J$  = 9.0, 5.5 Hz, 2H), 1.19 (td,  $J$  = 9.2, 8.4, 4.3 Hz, 2H), 1.15 (dt,  $J$  = 7.6, 3.6 Hz, 4H), 0.78 (t,  $J$  = 7.1 Hz, 3H).

**<sup>13</sup>C NMR (176 MHz, CDCl<sub>3</sub>)**  $\delta$  207.1 (dd,  $J$  = 2.9, 3.0 Hz), 158.1, 154.6 (dd,  $J$  = 292.1, 292.6 Hz), 136.8, 129.1 (t,  $J$  = 3.6 Hz), 128.6, 128.1, 127.5, 125.6 (t,  $J$  = 4.3 Hz), 115.0, 86.8 (dd,  $J$  = 22.3, 22.4 Hz), 70.0, 42.3 (d,  $J$  = 1.5 Hz), 42.0, 31.6, 28.8, 23.6, 22.5, 14.0.

**<sup>19</sup>F NMR (56 MHz, Chloroform-*d*)**  $\delta$  -88.7 (d,  $J$  = 38.9 Hz), -90.0 (d,  $J$  = 38.9 Hz).

**HRMS (ESI-TOF)**  $m/z$ : [M + H]<sup>+</sup> Calcd for C<sub>23</sub>H<sub>26</sub>F<sub>2</sub>O<sub>2</sub> 373.1974; Found: 373.1972.

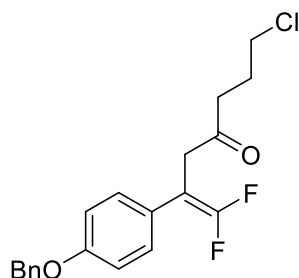

**2-(4-(benzyloxy)phenyl)-7-chloro-1,1-difluorohept-1-en-4-one (3ae)**

The title compound was prepared from 1-(benzyloxy)-4-(3,3,3-trifluoroprop-1-en-2-yl)benzene (55 mg, 0.20 mmol) and 1-chloro-3-iodopropane (41 mg, 0.20 mmol) according to general procedure 1. The crude residue was purified by flash chromatography (PE/EA = 50:1) to give the product as a colorless oil (37 mg, 51%).

**<sup>1</sup>H NMR (700 MHz, Chloroform-*d*)**  $\delta$  7.35 – 7.30 (m, 4H), 7.25 (t, *J* = 7.2 Hz, 1H), 7.14 (d, *J* = 8.4 Hz, 2H), 6.88 (d, *J* = 8.6 Hz, 2H), 4.98 (s, 2H), 3.44 (t, *J* = 6.3 Hz, 2H), 3.37 (s, 2H), 2.56 (t, *J* = 7.0 Hz, 2H), 1.97 – 1.91 (m, 2H).

**<sup>13</sup>C NMR (176 MHz, CDCl<sub>3</sub>)**  $\delta$  204.6 (dd, *J* = 2.8, 3.3 Hz), 157.1, 153.6 (dd, *J* = 292.8, 292.0 Hz), 135.7, 128.0 (t, *J* = 3.5 Hz), 127.6, 127.0, 126.4, 124.3 (t, *J* = 4.1 Hz), 114.0, 85.6 (dd, *J* = 21.9, 22.5 Hz), 69.0, 43.2, 41.4 (d, *J* = 1.7 Hz), 37.5, 25.1.

**<sup>19</sup>F NMR (56 MHz, Chloroform-*d*)**  $\delta$  -88.3 (d, *J* = 40.0 Hz), -89.6 (d, *J* = 37.6 Hz).

**HRMS (ESI-TOF)** *m/z*: [M + H]<sup>+</sup> Calcd for C<sub>20</sub>H<sub>19</sub>ClF<sub>2</sub>O<sub>2</sub> 365.1114; Found: 365.1111.

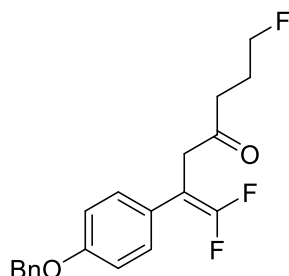

**2-(4-(benzyloxy)phenyl)-1,1,7-trifluorohept-1-en-4-one (3af)**

The title compound was prepared from 1-(benzyloxy)-4-(3,3,3-trifluoroprop-1-en-2-yl)benzene (55 mg, 0.20 mmol) and 1-fluoro-3-iodopropane (38 mg, 0.20 mmol) according to general procedure 1. The crude residue was purified by flash chromatography (PE/EA = 20:1) to give the product as a colorless oil (50 mg, 72%).

**<sup>1</sup>H NMR (700 MHz, Chloroform-*d*)**  $\delta$  7.34 (d, *J* = 7.1 Hz, 2H), 7.30 (dd, *J* = 8.4, 6.6 Hz, 2H), 7.24 (t, *J* = 7.3 Hz, 1H), 7.13 (d, *J* = 8.7 Hz, 2H), 6.87 (d, *J* = 8.8 Hz, 2H), 4.97 (s, 2H), 4.35 (t, *J* = 5.8 Hz, 1H), 4.28 (t, *J* = 5.8 Hz, 1H), 3.36 (s, 2H), 2.51 (t, *J* = 7.1 Hz, 2H), 1.90 – 1.77 (m, 2H).

**<sup>13</sup>C NMR (176 MHz, CDCl<sub>3</sub>)**  $\delta$  204.7 (dd, *J* = 2.9, 2.8 Hz), 157.1, 153.6 (dd, *J* = 292.2, 292.9 Hz), 135.7, 128.0 (t, *J* = 3.5 Hz), 127.6, 127.0, 126.4, 124.4 (t, *J* = 4.0 Hz), 114.0, 85.6 (dd, *J* = 22.0, 22.3 Hz), 81.9 (d, *J* = 165.0 Hz), 69.0, 41.3 (d, *J* = 1.7 Hz), 36.2 (d, *J* = 4.2 Hz), 23.3 (d, *J* = 21.1 Hz).

**<sup>19</sup>F NMR (56 MHz, Chloroform-*d*)**  $\delta$  -88.4 (d, *J* = 38.5 Hz), -89.6 (d, *J* = 38.5 Hz), -219.9 (m).

**HRMS (ESI-TOF)** *m/z*: [M + H]<sup>+</sup> Calcd for C<sub>20</sub>H<sub>19</sub>F<sub>3</sub>O<sub>2</sub> 349.1410; Found: 349.1408.

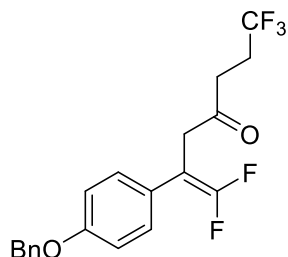

### 2-(4-(benzyloxy)phenyl)-1,1,7,7,7-pentafluorohept-1-en-4-one (3ag)

The title compound was prepared from 1-(benzyloxy)-4-(3,3,3-trifluoroprop-1-en-2-yl)benzene (55 mg, 0.20 mmol) and 1,1,1-trifluoro-3-iodopropane (45 mg, 0.20 mmol) according to general procedure 1. The crude residue was purified by flash chromatography (PE/EA = 20:1) to give the product as a colorless oil (45 mg, 59%).

**<sup>1</sup>H NMR (700 MHz, Chloroform-*d*)**  $\delta$  7.34 (d, *J* = 7.1 Hz, 2H), 7.30 (t, *J* = 7.5 Hz, 2H), 7.25 (t, *J* = 7.2 Hz, 1H), 7.12 (d, *J* = 8.5 Hz, 2H), 6.87 (d, *J* = 8.8 Hz, 2H), 4.97 (s, 2H), 3.38 (s, 2H), 2.65 – 2.57 (m, 2H), 2.29 (tdd, *J* = 10.8, 7.8, 4.9 Hz, 2H).

**<sup>13</sup>C NMR (176 MHz, CDCl<sub>3</sub>)**  $\delta$  203.1 (dd, *J* = 3.1, 3.0 Hz), 158.3, 154.7 (dd, *J* = 293.6, 292.3 Hz), 136.7, 129.0 (t, *J* = 3.7 Hz), 128.7, 128.1, 127.5, 125.1 (t, *J* = 4.0 Hz), 115.1, 86.3 (dd, *J* = 21.7, 22.3 Hz), 70.0, 42.2 (d, *J* = 2.1 Hz), 34.2 (d, *J* = 2.8 Hz), 27.9 (q, *J* = 30.1 Hz).

**<sup>19</sup>F NMR (56 MHz, Chloroform-*d*)**  $\delta$  -66.2, -88.3 (d, *J* = 37.2 Hz), -89.3 (d, *J* = 36.4 Hz).

**HRMS (ESI-TOF)** *m/z*: [M + H]<sup>+</sup> Calcd for C<sub>20</sub>H<sub>17</sub>F<sub>5</sub>O<sub>2</sub> 385.1221; Found: 385.1220.

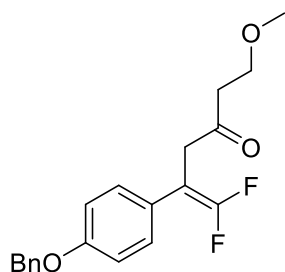

### 5-(4-(benzyloxy)phenyl)-6,6-difluoro-1-methoxyhex-5-en-3-one (3ah)

The title compound was prepared from 1-(benzyloxy)-4-(3,3,3-trifluoroprop-1-en-2-yl)benzene (55 mg, 0.20 mmol) and 1-iodo-2-methoxyethane (37 mg, 0.20 mmol) according to general procedure 1. The crude residue was purified by flash chromatography (PE/EA = 5:1) to give the product as a colorless oil (44 mg, 64%).

**<sup>1</sup>H NMR (700 MHz, Chloroform-*d*)**  $\delta$  7.34 (d, *J* = 7.2 Hz, 2H), 7.30 (dd, *J* = 8.6, 6.7 Hz, 2H), 7.27 – 7.22 (m, 1H), 7.16 – 7.12 (m, 2H), 6.86 (d, *J* = 8.8 Hz, 2H), 4.97 (s, 2H), 3.53 (t, *J* = 6.2 Hz, 2H), 3.39 (s, 2H), 3.22 (s, 3H), 2.59 (t, *J* = 6.2 Hz, 2H).

**<sup>13</sup>C NMR (176 MHz, CDCl<sub>3</sub>)**  $\delta$  205.1 (dd, *J* = 2.9, 3.2 Hz), 158.1, 154.6 (dd, *J* = 293.0, 293.0 Hz), 136.8, 129.1 (t, *J* = 3.6 Hz), 128.6, 128.1, 127.5, 125.5 (t, *J* = 3.8 Hz), 115.0, 86.5 (dd, *J* = 21.8, 22.4 Hz), 70.0, 67.5, 58.9, 42.9 (d, *J* = 1.8 Hz), 42.1.

**<sup>19</sup>F NMR (56 MHz, Chloroform-*d*)**  $\delta$  -88.3 (d, *J* = 37.7 Hz), -89.6 (d, *J* = 38.6 Hz).

**HRMS (ESI-TOF)** *m/z*: [M + H]<sup>+</sup> Calcd for C<sub>20</sub>H<sub>20</sub>F<sub>2</sub>O<sub>3</sub> 347.1453; Found: 347.1453.

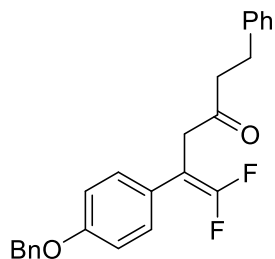

### 5-(4-(benzyloxy)phenyl)-6,6-difluoro-1-phenylhex-5-en-3-one (3ai)

The title compound was prepared from 1-(benzyloxy)-4-(3,3,3-trifluoroprop-1-en-2-yl)benzene (55 mg, 0.20 mmol) and (2-iodoethyl)benzene (46 mg, 0.20 mmol) according to general procedure 1. The crude residue was purified by flash chromatography (PE/EA = 20:1) to give the product as a colorless oil (27 mg, 45%).

**<sup>1</sup>H NMR (700 MHz, Chloroform-*d*)**  $\delta$  7.35 (d,  $J$  = 7.0 Hz, 2H), 7.31 (t,  $J$  = 7.6 Hz, 2H), 7.27 – 7.24 (m, 1H), 7.20 – 7.16 (m, 2H), 7.12 – 7.09 (m, 1H), 7.09 – 7.07 (m, 2H), 7.06 – 7.03 (m, 2H), 6.85 (d,  $J$  = 8.8 Hz, 2H), 4.98 (s, 2H), 3.31 (d,  $J$  = 2.3 Hz, 2H), 2.79 (t,  $J$  = 7.6 Hz, 2H), 2.68 (t,  $J$  = 7.6 Hz, 2H).

**<sup>13</sup>C NMR (176 MHz, CDCl<sub>3</sub>)**  $\delta$  204.8 (dd,  $J$  = 2.1, 2.4 Hz), 157.0, 153.6 (dd,  $J$  = 292.4, 292.0 Hz), 139.7, 135.7, 128.0 (t,  $J$  = 4.2 Hz), 127.6, 127.5, 127.3, 127.0, 126.4, 125.2, 124.4 (t,  $J$  = 3.8 Hz), 113.9, 85.6 (dd,  $J$  = 22.1, 22.0 Hz), 69.0, 42.4, 41.5 (d,  $J$  = 1.7 Hz), 28.6.

**<sup>19</sup>F NMR (56 MHz, Chloroform-*d*)**  $\delta$  -88.3 (d,  $J$  = 38.2 Hz), -89.6 (d,  $J$  = 38.2 Hz).

**HRMS (ESI-TOF)**  $m/z$ : [M + H]<sup>+</sup> Calcd for C<sub>25</sub>H<sub>22</sub>F<sub>2</sub>O<sub>2</sub> 393.1661; Found: 393.1659.

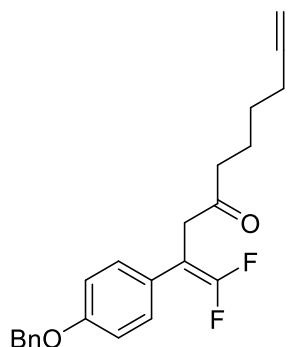

### 2-(4-(benzyloxy)phenyl)-1,1-difluorodec-1-en-9-yn-4-one (3aj)

The title compound was prepared from 1-(benzyloxy)-4-(3,3,3-trifluoroprop-1-en-2-yl)benzene (55 mg, 0.20 mmol) and 6-iodohex-1-yne (42 mg, 0.20 mmol) according to general procedure 1. The crude residue was purified by flash chromatography (PE/EA = 50:1) to give the product as a colorless oil (33 mg, 45%).

**<sup>1</sup>H NMR (700 MHz, Chloroform-*d*)**  $\delta$  7.35 (d,  $J$  = 7.3 Hz, 2H), 7.31 (dd,  $J$  = 8.3, 6.6 Hz, 2H), 7.27 – 7.24 (m, 1H), 7.15 – 7.11 (m, 2H), 6.87 (d,  $J$  = 8.8 Hz, 2H), 4.98 (s, 2H), 3.34 (s, 2H), 2.38 (t,  $J$  = 7.3 Hz, 2H), 2.08 (td,  $J$  = 7.0, 2.7 Hz, 2H), 1.86 (s, 1H), 1.59 (p,  $J$  = 7.4 Hz, 2H), 1.43 – 1.36 (m, 2H).

**<sup>13</sup>C NMR (176 MHz, CDCl<sub>3</sub>)**  $\delta$  205.4 (dd,  $J$  = 2.0, 3.6 Hz), 157.1, 153.6 (dd,  $J$  = 292.8, 292.5 Hz), 135.7, 128.0 (t,  $J$  = 4.0 Hz), 127.6, 127.0, 126.4, 124.5 (t,  $J$  = 4.1 Hz), 113.9, 85.7 (dd,  $J$  = 21.9, 21.9 Hz), 82.9, 69.0, 67.6, 41.2 (d,  $J$  = 1.6 Hz), 40.2, 26.7, 21.6, 17.2.

**<sup>19</sup>F NMR (56 MHz, Chloroform-*d*)**  $\delta$  -88.5 (d,  $J$  = 39.1 Hz), -89.8 (d,  $J$  = 36.4 Hz).

**HRMS (ESI-TOF)**  $m/z$ : [M + H]<sup>+</sup> Calcd for C<sub>23</sub>H<sub>22</sub>F<sub>2</sub>O<sub>2</sub> 369.1661; Found: 369.1660.

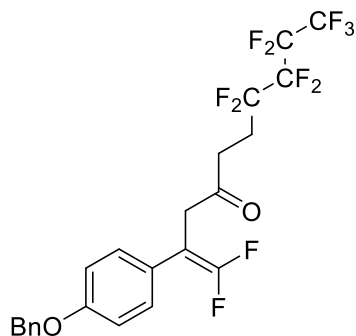

**2-(4-(benzyloxy)phenyl)-1,1,7,7,8,8,9,9,10,10,10-undecafluorodec-1-en-4-one (3ak)**

The title compound was prepared from 1-(benzyloxy)-4-(3,3,3-trifluoroprop-1-en-2-yl)benzene (55 mg, 0.20 mmol) and 1,1,1,2,2,3,3,4-nonafluoro-6-iodohexane (75 mg, 0.20 mmol) according to general procedure 1. The crude residue was purified by flash chromatography (PE/EA = 50:1) to give the product as a colorless oil (51 mg, 48%).

**<sup>1</sup>H NMR (400 MHz, Chloroform-*d*)**  $\delta$  7.36 – 7.24 (m, 5H), 7.16 – 7.09 (m, 2H), 6.88 (d, *J* = 8.8 Hz, 2H), 4.97 (s, 2H), 3.40 (s, 2H), 2.66 (dd, *J* = 8.5, 6.6 Hz, 2H), 2.39 – 2.20 (m, 2H).

**<sup>13</sup>C NMR (101 MHz, CDCl<sub>3</sub>)**  $\delta$  203.2 (dd, *J* = 3.0, 2.7 Hz), 158.3, 154.6 (dd, *J* = 292.9, 292.9 Hz), 136.7, 129.1 (t, *J* = 3.6 Hz), 128.6, 128.1, 127.5, 125.1 (t, *J* = 3.6 Hz), 115.1, 86.3 (dd, *J* = 22.0, 21.6 Hz), 70.0, 42.3 (d, *J* = 1.7 Hz), 32.5, 24.9 (t, *J* = 22.2 Hz).

**<sup>19</sup>F NMR (56 MHz, Chloroform-*d*)**  $\delta$  -80.6 (s), -88.2 (d, *J* = 36.8 Hz), -89.3 (d, *J* = 38.0 Hz), -114.0 (s), -124.0 (s), -125.6 (s).

**HRMS (ESI-TOF)** *m/z*: [M + H]<sup>+</sup> Calcd for C<sub>23</sub>H<sub>17</sub>F<sub>11</sub>O<sub>2</sub> 535.1126; Found: 535.1122.

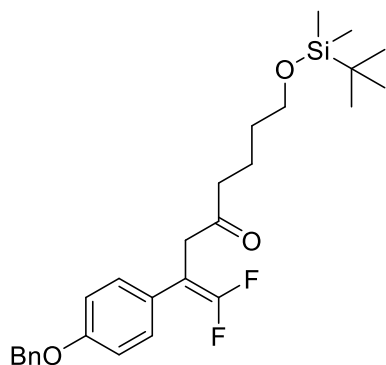

**2-(4-(benzyloxy)phenyl)-8-((tert-butyl)dimethylsilyloxy)-1,1-difluorooct-1-en-4-one (3al)**

The title compound was prepared from 1-(benzyloxy)-4-(3,3,3-trifluoroprop-1-en-2-yl)benzene (55 mg, 0.20 mmol) and *tert*-butyl(4-iodobutoxy)dimethylsilane (63 mg, 0.20 mmol) according to general procedure 1. The crude residue was purified by flash chromatography (PE/EA = 50:1) to give the product as a colorless oil (45 mg, 47%).

**<sup>1</sup>H NMR (700 MHz, Chloroform-*d*)**  $\delta$  7.39 (d, *J* = 7.4 Hz, 2H), 7.35 (t, *J* = 7.5 Hz, 2H), 7.32 – 7.27 (m, 1H), 7.20 – 7.16 (m, 2H), 6.94 – 6.87 (m, 2H), 5.02 (s, 2H), 3.54 (t, *J* = 6.3 Hz, 2H), 3.38 (t, *J* = 2.3 Hz, 2H), 2.43 (t, *J* = 7.4 Hz, 2H), 1.57 (q, *J* = 7.6 Hz, 2H), 1.46 – 1.41 (m, 2H), 0.85 (s, 9H), 0.00 (s, 6H).

**<sup>13</sup>C NMR (176 MHz, CDCl<sub>3</sub>)**  $\delta$  205.7 (dd, *J* = 2.6, 2.9 Hz), 153.6 (dd, *J* = 293.3, 291.7 Hz), 151.9, 135.8, 128.0 (t, *J* = 3.3 Hz), 127.6, 127.0, 126.4, 124.6 (t, *J* = 4.8 Hz), 113.9, 85.7 (dd, *J* = 22.5, 21.9 Hz), 69.0, 61.7, 41.2 (d, *J* = 1.9 Hz), 40.7, 31.0, 24.9, 19.1, 17.3, -6.4.

**<sup>19</sup>F NMR (56 MHz, Chloroform-*d*)**  $\delta$  -88.6 (d, *J* = 39.5 Hz), -89.9 (d, *J* = 38.6 Hz).

**HRMS (ESI-TOF)** *m/z*: [M + H]<sup>+</sup> Calcd for C<sub>27</sub>H<sub>36</sub>F<sub>2</sub>O<sub>3</sub>Si 475.2475; Found: 475.2474.

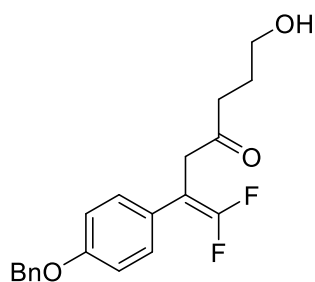

### 2-(4-(benzyloxy)phenyl)-1,1-difluoro-7-hydroxyhept-1-en-4-one (3am)

The title compound was prepared from 1-(benzyloxy)-4-(3,3,3-trifluoroprop-1-en-2-yl)benzene (55 mg, 0.20 mmol) and 3-iodopropan-1-ol (38 mg, 0.20 mmol) according to general procedure 1. The crude residue was purified by flash chromatography (PE/EA = 2:1) to give the product as a colorless oil (34 mg, 49%).

**<sup>1</sup>H NMR (700 MHz, Chloroform-*d*)**  $\delta$  7.34 (d,  $J$  = 7.1 Hz, 2H), 7.31 (t,  $J$  = 7.7 Hz, 2H), 7.27 – 7.23 (m, 1H), 7.16 – 7.12 (m, 2H), 6.88 – 6.85 (m, 2H), 4.97 (s, 2H), 3.51 (t,  $J$  = 6.1 Hz, 2H), 3.37 (s, 2H), 2.50 (t,  $J$  = 6.9 Hz, 2H), 1.73 (t,  $J$  = 6.5 Hz, 2H), 1.58 (s, 1H).

**<sup>13</sup>C NMR (176 MHz, CDCl<sub>3</sub>)**  $\delta$  207.2 (dd,  $J$  = 2.6, 2.9 Hz), 158.1, 154.6 (dd,  $J$  = 293.1, 293.1 Hz), 136.8, 129.1 (t,  $J$  = 3.4 Hz), 128.6, 128.1, 127.5, 125.5 (t,  $J$  = 4.1 Hz), 115.0, 86.7 (dd,  $J$  = 22.1, 22.0 Hz), 70.0, 62.0, 42.4 (d,  $J$  = 1.7 Hz), 38.6, 26.3.

**<sup>19</sup>F NMR (56 MHz, Chloroform-*d*)**  $\delta$  -90.9 (d,  $J$  = 45.9 Hz), -92.3 (d,  $J$  = 41.8 Hz).

**HRMS (ESI-TOF)**  $m/z$ : [M + H]<sup>+</sup> Calcd for C<sub>20</sub>H<sub>20</sub>F<sub>2</sub>O<sub>3</sub> 347.1453; Found: 347.1450.

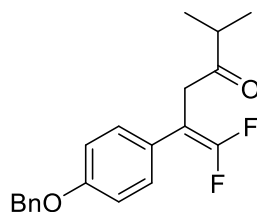

### 5-(4-(benzyloxy)phenyl)-6,6-difluoro-2-methylhex-5-en-3-one (3an)

The title compound was prepared from 1-(benzyloxy)-4-(3,3,3-trifluoroprop-1-en-2-yl)benzene (55 mg, 0.20 mmol) and 2-iodopropane (34 mg, 0.20 mmol) according to general procedure 1. The crude residue was purified by flash chromatography (PE/EA = 50:1) to give the product as a colorless oil (39 mg, 59%).

**<sup>1</sup>H NMR (400 MHz, Chloroform-*d*)**  $\delta$  7.37 – 7.28 (m, 4H), 7.28 – 7.21 (m, 1H), 7.12 (dd,  $J$  = 8.9, 1.2 Hz, 2H), 6.86 (d,  $J$  = 8.8 Hz, 2H), 4.97 (s, 2H), 3.39 (t,  $J$  = 2.2 Hz, 2H), 2.59 (p,  $J$  = 6.9 Hz, 1H), 1.00 (d,  $J$  = 7.0 Hz, 6H).

**<sup>13</sup>C NMR (101 MHz, CDCl<sub>3</sub>)**  $\delta$  210.3 (dd,  $J$  = 2.6, 2.6 Hz), 158.1, 154.6 (dd,  $J$  = 292.7, 290.9 Hz), 136.8, 129.1 (t,  $J$  = 3.5 Hz), 128.6, 128.0, 127.5, 125.9 (t,  $J$  = 4.0 Hz), 114.9, 86.8 (dd,  $J$  = 22.0, 22.2 Hz), 70.0, 40.2, 40.1 (d,  $J$  = 2.2 Hz), 18.2.

**<sup>19</sup>F NMR (56 MHz, Chloroform-*d*)**  $\delta$  -89.0 (d,  $J$  = 41.6 Hz), -90.2 (d,  $J$  = 39.1 Hz).

**HRMS (ESI-TOF)**  $m/z$ : [M + H]<sup>+</sup> Calcd for C<sub>20</sub>H<sub>20</sub>F<sub>2</sub>O<sub>2</sub> 331.1504; Found: 331.1501.

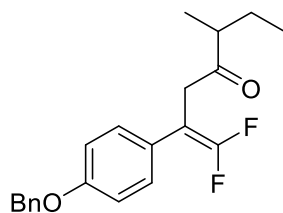

### 2-(4-(benzyloxy)phenyl)-1,1-difluoro-5-methylhept-1-en-4-one (3ao)

The title compound was prepared from 1-(benzyloxy)-4-(3,3,3-trifluoroprop-1-en-2-yl)benzene (55 mg, 0.20 mmol) and 2-iodobutane (37 mg, 0.20 mmol) according to general procedure 1. The crude residue was purified by flash chromatography (PE/EA = 40:1) to give the product as a colorless oil (35 mg, 51%).

**<sup>1</sup>H NMR (700 MHz, Chloroform-*d*)**  $\delta$  7.34 (d, *J* = 7.6 Hz, 2H), 7.31 (t, *J* = 7.5 Hz, 2H), 7.25 (t, *J* = 7.3 Hz, 1H), 7.13 (d, *J* = 8.3 Hz, 2H), 6.89 – 6.83 (m, 2H), 4.97 (s, 2H), 3.38 (s, 2H), 2.45 (q, *J* = 6.9 Hz, 1H), 1.58 (dq, *J* = 14.4, 7.2 Hz, 1H), 1.30 (dp, *J* = 14.2, 7.1 Hz, 1H), 0.97 (d, *J* = 6.8 Hz, 3H), 0.75 (t, *J* = 7.4 Hz, 3H).

**<sup>13</sup>C NMR (176 MHz, CDCl<sub>3</sub>)**  $\delta$  209.3 (dd, *J* = 2.7, 3.0 Hz), 157.0, 153.6 (dd, *J* = 291.8, 290.9 Hz), 135.8, 128.1 (t, *J* = 3.5 Hz), 127.6, 127.0, 126.4, 124.8 (t, *J* = 3.9 Hz), 113.8, 85.6 (dd, *J* = 22.2, 22.0 Hz), 69.0, 46.0, 39.9 (d, *J* = 2.2 Hz), 24.9, 14.9, 10.5.

**<sup>19</sup>F NMR (56 MHz, Chloroform-*d*)**  $\delta$  -89.0 (d, *J* = 40.3 Hz), -90.2 (d, *J* = 40.3 Hz).

**HRMS (ESI-TOF)** *m/z*: [M + H]<sup>+</sup> Calcd for C<sub>21</sub>H<sub>22</sub>F<sub>2</sub>O<sub>2</sub> 345.1661; Found: 345.1658.

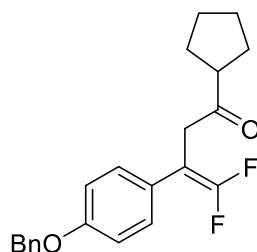

### 3-(4-(benzyloxy)phenyl)-1-cyclopentyl-4,4-difluorobut-3-en-1-one (3ap)

The title compound was prepared from 1-(benzyloxy)-4-(3,3,3-trifluoroprop-1-en-2-yl)benzene (55 mg, 0.20 mmol) and iodocyclopentane (39 mg, 0.20 mmol) according to general procedure 1. The crude residue was purified by flash chromatography (PE/EA = 50:1) to give the product as a colorless oil (37 mg, 52%).

**<sup>1</sup>H NMR (400 MHz, Chloroform-*d*)**  $\delta$  7.36 – 7.27 (m, 5H), 7.27 – 7.22 (m, 1H), 7.16 – 7.11 (m, 2H), 6.88 – 6.83 (m, 2H), 4.96 (s, 2H), 3.39 (t, *J* = 2.2 Hz, 2H), 2.89 – 2.78 (m, 1H), 1.72 – 1.46 (m, 8H).

**<sup>13</sup>C NMR (101 MHz, CDCl<sub>3</sub>)**  $\delta$  209.0 (dd, *J* = 2.7, 2.8 Hz), 158.0, 154.6 (dd, *J* = 292.2, 291.5 Hz), 136.8, 129.1 (t, *J* = 3.5 Hz), 128.6, 128.1, 127.5, 125.9 (t, *J* = 4.1 Hz), 114.9, 86.8 (dd, *J* = 22.2, 22.0 Hz), 70.0, 50.6, 41.5 (d, *J* = 2.2 Hz), 29.0, 26.0.

**<sup>19</sup>F NMR (56 MHz, Chloroform-*d*)**  $\delta$  -88.8 (d, *J* = 37.9 Hz), -90.1 (d, *J* = 40.2 Hz).

**HRMS (ESI-TOF)** *m/z*: [M + H]<sup>+</sup> Calcd for C<sub>22</sub>H<sub>22</sub>F<sub>2</sub>O<sub>2</sub> 357.1661; Found: 357.1657.

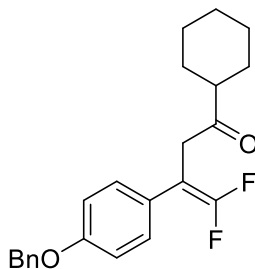

### 3-(4-(benzyloxy)phenyl)-1-cyclohexyl-4,4-difluorobut-3-en-1-one (3aq)

The title compound was prepared from 1-(benzyloxy)-4-(3,3,3-trifluoroprop-1-en-2-yl)benzene (55 mg, 0.20 mmol) and iodocyclohexane (42 mg, 0.20 mmol) according to general procedure 1. The crude residue was purified by flash chromatography (PE/EA = 50:1) to give the product as a colorless oil (43 mg, 58%).

<sup>1</sup>H NMR (400 MHz, Chloroform-*d*) δ 7.36 – 7.27 (m, 4H), 7.27 – 7.21 (m, 1H), 7.14 – 7.08 (m, 2H), 6.85 (d, *J* = 8.9 Hz, 2H), 4.96 (s, 2H), 3.37 (s, 2H), 2.41 – 2.27 (m, 1H), 1.80 – 1.62 (m, 4H), 1.43 – 0.76 (m, 6H).

<sup>13</sup>C NMR (101 MHz, CDCl<sub>3</sub>) δ 209.6 (dd, *J* = 2.1, 3.2 Hz), 158.0, 154.5 (dd, *J* = 291.9, 291.9 Hz), 136.8, 129.1 (t, *J* = 3.6 Hz), 128.6, 128.0, 127.5, 126.0 (t, *J* = 3.9 Hz), 114.9, 86.7 (dd, *J* = 22.4, 22.0 Hz), 70.0, 50.2, 40.3 (d, *J* = 2.1 Hz), 28.5, 25.8, 25.6.

<sup>19</sup>F NMR (56 MHz, Chloroform-*d*) δ -89.0 (d, *J* = 40.8 Hz), -90.2 (d, *J* = 40.8 Hz).

HRMS (ESI-TOF) *m/z*: [M + H]<sup>+</sup> Calcd for C<sub>23</sub>H<sub>24</sub>F<sub>2</sub>O<sub>2</sub> 371.1817; Found: 371.1812.

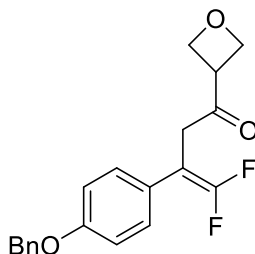

### 3-(4-(benzyloxy)phenyl)-4,4-difluoro-1-(oxetan-3-yl)but-3-en-1-one (3ar)

The title compound was prepared from 1-(benzyloxy)-4-(3,3,3-trifluoroprop-1-en-2-yl)benzene (55 mg, 0.20 mmol) and 3-iodooxetane (37 mg, 0.20 mmol) according to general procedure 1. The crude residue was purified by flash chromatography (PE/EA = 2:1) to give the product as a colorless oil (47 mg, 68%).

<sup>1</sup>H NMR (700 MHz, Chloroform-*d*) δ 7.34 (d, *J* = 7.2 Hz, 2H), 7.32 – 7.28 (m, 2H), 7.26 – 7.22 (m, 1H), 7.16 – 7.11 (m, 2H), 6.87 (d, *J* = 8.7 Hz, 2H), 4.97 (s, 2H), 4.67 – 4.58 (m, 4H), 3.88 (p, *J* = 7.6 Hz, 1H), 3.35 (s, 2H).

<sup>13</sup>C NMR (176 MHz, CDCl<sub>3</sub>) δ 204.1 (dd, *J* = 2.7, 3.2 Hz), 158.3, 154.6 (dd, *J* = 292.7, 293.8 Hz), 136.7, 129.0 (t, *J* = 3.5 Hz), 128.7, 128.1, 127.5, 125.0 (t, *J* = 3.8 Hz), 115.1, 86.1 (dd, *J* = 21.4, 21.6 Hz), 72.2, 70.1, 44.5, 40.8 (d, *J* = 1.9 Hz).

<sup>19</sup>F NMR (56 MHz, Chloroform-*d*) δ -88.4 (d, *J* = 38.1 Hz), -89.5 (d, *J* = 38.5 Hz).

HRMS (ESI-TOF) *m/z*: [M + H]<sup>+</sup> Calcd for C<sub>20</sub>H<sub>18</sub>F<sub>2</sub>O<sub>3</sub> 345.1297; Found: 345.1297.



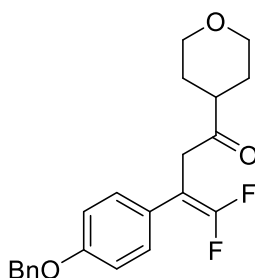

**3-(4-(benzyloxy)phenyl)-4,4-difluoro-1-(tetrahydro-2H-pyran-4-yl)but-3-en-1-one (3as)**

The title compound was prepared from 1-(benzyloxy)-4-(3,3,3-trifluoroprop-1-en-2-yl)benzene (55 mg, 0.20 mmol) and 4-iodotetrahydro-2H-pyran (43 mg, 0.20 mmol) according to general procedure 1. The crude residue was purified by flash chromatography (PE/EA = 2:1) to give the product as a colorless oil (43 mg, 58%).

**<sup>1</sup>H NMR (400 MHz, Chloroform-*d*)**  $\delta$  7.36 – 7.27 (m, 4H), 7.28 – 7.22 (m, 1H), 7.16 – 7.07 (m, 2H), 6.90 – 6.83 (m, 2H), 4.97 (s, 2H), 3.90 (dt, *J* = 11.5, 3.5 Hz, 2H), 3.39 (t, *J* = 2.2 Hz, 2H), 3.35 – 3.26 (m, 2H), 2.59 – 2.46 (m, 1H), 1.61 (ddd, *J* = 10.2, 7.2, 3.8 Hz, 4H).

**<sup>13</sup>C NMR (101 MHz, CDCl<sub>3</sub>)**  $\delta$  207.6 (dd, *J* = 2.6, 2.8 Hz), 158.1, 154.6 (dd, *J* = 292.6, 291.7 Hz), 136.8, 129.1 (t, *J* = 3.3 Hz), 128.6, 128.1, 127.5, 125.6 (t, *J* = 3.9 Hz), 115.0, 86.5 (dd, *J* = 22.3, 21.9 Hz), 70.0, 67.1, 46.9, 40.1 (d, *J* = 2.3 Hz), 28.1.

**<sup>19</sup>F NMR (56 MHz, Chloroform-*d*)**  $\delta$  -88.7 (d, *J* = 40.8 Hz), -89.8 (d, *J* = 40.3 Hz).

**HRMS (ESI-TOF)** *m/z*: [M + H]<sup>+</sup> Calcd for C<sub>22</sub>H<sub>22</sub>F<sub>2</sub>O<sub>3</sub> 373.1610; Found: 373.1609.

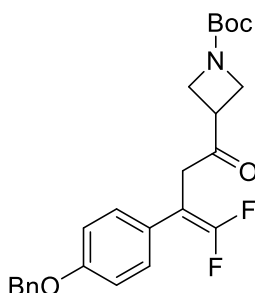

**tert-butyl 3-(3-(4-(benzyloxy)phenyl)-4,4-difluorobut-3-enoyl)azetidine-1-carboxylate (3at)**

The title compound was prepared from 1-(benzyloxy)-4-(3,3,3-trifluoroprop-1-en-2-yl)benzene (55 mg, 0.20 mmol) and *tert*-butyl 3-iodoazetidine-1-carboxylate (57 mg, 0.20 mmol) according to general procedure 1. The crude residue was purified by flash chromatography (PE/EA = 2:1) to give the product as a colorless oil (56 mg, 63%).

**<sup>1</sup>H NMR (400 MHz, Chloroform-*d*)**  $\delta$  7.36 – 7.28 (m, 4H), 7.27 – 7.22 (m, 1H), 7.16 – 7.10 (m, 2H), 6.90 – 6.85 (m, 2H), 5.20 (s, 1H), 4.97 (s, 2H), 3.88 (q, *J* = 8.3, 7.6 Hz, 4H), 3.36 (t, *J* = 2.2 Hz, 2H), 1.34 (s, 9H).

**<sup>13</sup>C NMR (101 MHz, CDCl<sub>3</sub>)**  $\delta$  204.3 (dd, *J* = 2.9, 3.3 Hz), 158.3, 156.1, 154.6 (dd, *J* = 293.3, 293.5 Hz), 136.7, 129.0 (t, *J* = 3.5 Hz), 128.7, 128.1, 127.5, 125.0 (t, *J* = 4.0 Hz), 115.1, 86.1 (dd, *J* = 21.5, 21.9 Hz), 79.9, 70.1, 53.5, 40.7 (d, *J* = 2.1 Hz), 37.8, 28.3.

**<sup>19</sup>F NMR (56 MHz, Chloroform-*d*)**  $\delta$  -87.9 (d, *J* = 37.4 Hz), -89.0 (d, *J* = 35.9 Hz).

**HRMS (ESI-TOF)** *m/z*: [M + H]<sup>+</sup> Calcd for C<sub>25</sub>H<sub>27</sub>F<sub>2</sub>NO<sub>4</sub> 444.1981; Found: 444.1980.

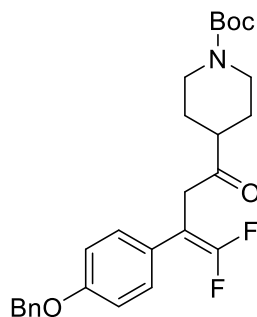

**tert-butyl 4-(3-(4-(benzyloxy)phenyl)-4,4-difluorobut-3-enyl)piperidine-1-carboxylate (3au)**

The title compound was prepared from 1-(benzyloxy)-4-(3,3,3-trifluoroprop-1-en-2-yl)benzene (55 mg, 0.20 mmol) and *tert*-butyl 4-iodopiperidine-1-carboxylate (62 mg, 0.20 mmol) according to general procedure 1. The crude residue was purified by flash chromatography (PE/EA = 2:1) to give the product as a colorless oil (52 mg, 55%).

**<sup>1</sup>H NMR (400 MHz, Chloroform-*d*)**  $\delta$  7.32 (dddd,  $J$  = 12.5, 7.6, 6.4, 1.7 Hz, 4H), 7.27 – 7.21 (m, 1H), 7.14 – 7.08 (m, 2H), 6.88 – 6.83 (m, 2H), 4.97 (s, 2H), 4.00 (s, 2H), 3.40 (t,  $J$  = 2.3 Hz, 2H), 2.67 (t,  $J$  = 12.7 Hz, 2H), 2.45 (tt,  $J$  = 11.4, 3.7 Hz, 1H), 1.67 (d,  $J$  = 12.8 Hz, 2H), 1.49 – 1.39 (m, 2H), 1.37 (s, 9H).

**<sup>13</sup>C NMR (101 MHz, CDCl<sub>3</sub>)**  $\delta$  207.9 (dd,  $J$  = 1.8, 3.2 Hz), 158.1, 154.6, 154.5 (dd,  $J$  = 291.6, 292.0 Hz), 136.8, 129.1 (t,  $J$  = 4.0 Hz), 128.6, 128.1, 127.5, 125.6 (t,  $J$  = 3.6 Hz), 115.0, 86.5 (dd,  $J$  = 21.9, 22.2 Hz), 79.7, 70.0, 47.9, 40.3 (d,  $J$  = 2.0 Hz), 28.4, 27.4.

**<sup>19</sup>F NMR (56 MHz, Chloroform-*d*)**  $\delta$  -88.7 (d,  $J$  = 37.8 Hz), -89.9 (d,  $J$  = 37.8 Hz).

**HRMS (ESI-TOF)**  $m/z$ : [M + H]<sup>+</sup> Calcd for C<sub>27</sub>H<sub>31</sub>F<sub>2</sub>NO<sub>4</sub> 472.2294; Found: 472.2295.

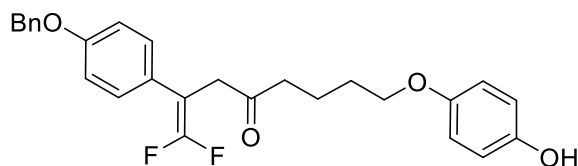

**2-(4-(benzyloxy)phenyl)-1,1-difluoro-8-(4-hydroxyphenoxy)oct-1-en-4-one (3av)**

The title compound was prepared from 1-(benzyloxy)-4-(3,3,3-trifluoroprop-1-en-2-yl)benzene (55 mg, 0.20 mmol) and 4-(4-iodobutoxy)phenol (59 mg, 0.20 mmol) according to general procedure 1. The crude residue was purified by flash chromatography (PE/EA = 5:1) to give the product as a colorless oil (44 mg, 49%).

**<sup>1</sup>H NMR (700 MHz, Chloroform-*d*)**  $\delta$  7.33 (d,  $J$  = 7.6 Hz, 2H), 7.30 (t,  $J$  = 7.5 Hz, 2H), 7.24 (t,  $J$  = 7.3 Hz, 1H), 7.13 (d,  $J$  = 8.5 Hz, 2H), 6.85 (d,  $J$  = 8.3 Hz, 2H), 6.64 (s, 4H), 4.95 (s, 2H), 4.90 (s, 1H), 3.75 (t,  $J$  = 5.9 Hz, 2H), 3.34 (s, 2H), 2.43 (t,  $J$  = 6.8 Hz, 2H), 1.62 (dq,  $J$  = 15.6, 6.2, 4.9 Hz, 4H).

**<sup>13</sup>C NMR (176 MHz, CDCl<sub>3</sub>)**  $\delta$  207.1 (dd,  $J$  = 2.5, 3.1 Hz), 158.1, 154.6 (dd,  $J$  = 292.6, 291.6 Hz), 153.0, 149.6, 136.8, 129.1 (t,  $J$  = 3.1 Hz), 128.7, 128.1, 127.5, 125.5 (t,  $J$  = 3.8 Hz), 116.1, 115.6, 115.0, 86.7 (dd,  $J$  = 22.5, 22.5 Hz), 70.0, 68.2, 42.3 (d,  $J$  = 1.8 Hz), 41.5, 28.6, 20.3.

**<sup>19</sup>F NMR (56 MHz, Chloroform-*d*)**  $\delta$  -88.6 (d,  $J$  = 37.1 Hz), -89.9 (d,  $J$  = 36.8 Hz).

**HRMS (ESI-TOF)**  $m/z$ : [M + H]<sup>+</sup> Calcd for C<sub>27</sub>H<sub>26</sub>F<sub>2</sub>O<sub>4</sub> 453.1872; Found: 453.1869.

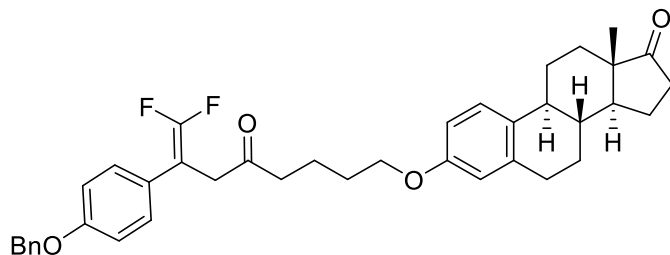

**(8R,9S,13S,14S)-3-((7-(4-(benzyloxy)phenyl)-8,8-difluoro-5-oxooct-7-en-1-yl)oxy)-13-methyl-6,7,8,9,11,12,13,14,15,16-decahydro-17H-cyclopenta[a]phenanthren-17-one (3aw)**

The title compound was prepared from 1-(benzyloxy)-4-(3,3,3-trifluoroprop-1-en-2-yl)benzene (55 mg, 0.20 mmol) and Estrone iodide (91 mg, 0.20 mmol) according to general procedure 1. The crude residue was purified by flash chromatography (PE/EA = 5:1) to give the product as a colorless oil (37 mg, 30%).

**<sup>1</sup>H NMR (700 MHz, Chloroform-*d*)**  $\delta$  7.34 (d, *J* = 7.2 Hz, 2H), 7.30 (t, *J* = 7.5 Hz, 2H), 7.25 (t, *J* = 7.2 Hz, 1H), 7.13 (d, *J* = 8.5 Hz, 2H), 7.10 (d, *J* = 8.7 Hz, 1H), 6.86 (d, *J* = 8.8 Hz, 2H), 6.60 (dd, *J* = 8.6, 2.7 Hz, 1H), 6.53 (d, *J* = 2.7 Hz, 1H), 4.96 (s, 2H), 3.81 (t, *J* = 5.6 Hz, 2H), 3.34 (s, 2H), 2.85 – 2.75 (m, 2H), 2.46 – 2.38 (m, 3H), 2.33 – 2.28 (m, 1H), 2.16 (td, *J* = 11.0, 4.3 Hz, 1H), 2.06 (dt, *J* = 18.7, 9.0 Hz, 1H), 1.99 – 1.94 (m, 1H), 1.91 (ddd, *J* = 11.4, 5.7, 2.7 Hz, 1H), 1.88 – 1.84 (m, 1H), 1.64 (dq, *J* = 6.1, 3.3, 2.7 Hz, 4H), 1.56 – 1.47 (m, 2H), 1.42 (ddd, *J* = 12.2, 6.2, 3.8 Hz, 2H), 1.39 – 1.30 (m, 2H), 0.82 (s, 3H).

**<sup>13</sup>C NMR (176 MHz, CDCl<sub>3</sub>)**  $\delta$  206.5 (dd, *J* = 2.5, 3.1 Hz), 158.1, 157.0, 154.6 (dd, *J* = 293.0, 293.0 Hz), 137.8, 136.8, 132.0, 129.1 (t, *J* = 2.7 Hz), 128.6, 128.1, 127.5, 126.3, 125.5 (t, *J* = 4.3 Hz), 115.0, 114.5, 112.1, 86.8 (dd, *J* = 22.1, 22.1 Hz), 70.0, 67.4, 50.4, 48.0, 44.0, 42.3 (d, *J* = 1.4 Hz), 41.5, 38.4, 35.9, 31.6, 29.7, 28.6, 26.9, 26.6, 25.9, 21.6, 20.3, 13.9.

**<sup>19</sup>F NMR (56 MHz, Chloroform-*d*)**  $\delta$  -88.5 (d, *J* = 39.4 Hz), -89.8 (d, *J* = 39.4 Hz).

**HRMS (ESI-TOF)** *m/z*: [M + H]<sup>+</sup> Calcd for C<sub>39</sub>H<sub>42</sub>F<sub>2</sub>O<sub>4</sub> 613.3124; Found: 613.3122.

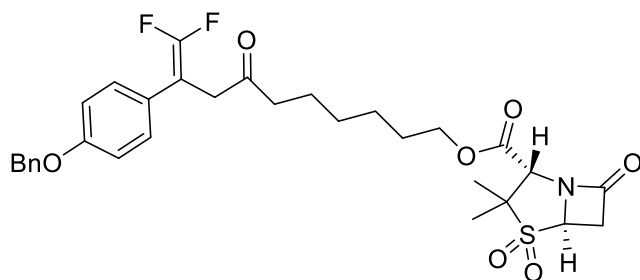

**9-(4-(benzyloxy)phenyl)-10,10-difluoro-7-oxodec-9-en-1-yl**

**(2S,5R)-3,3-dimethyl-7-oxo-4-thia-1-azabicyclo[3.2.0]heptane-2-carboxylate 4,4-dioxide (3ax)**

The title compound was prepared from 1-(benzyloxy)-4-(3,3,3-trifluoroprop-1-en-2-yl)benzene (55 mg, 0.20 mmol) and Sulbactam iodide (89 mg, 0.20 mmol) according to general procedure 1. The crude residue was purified by flash chromatography (PE/EA = 3:1) to give the product as a colorless oil (46 mg, 38%).

**<sup>1</sup>H NMR (700 MHz, Chloroform-*d*)**  $\delta$  7.35 (d, *J* = 7.6 Hz, 2H), 7.31 (t, *J* = 7.5 Hz, 2H), 7.26 (t, *J* = 7.2 Hz, 1H), 7.14 (d, *J* = 8.4 Hz, 2H), 6.88 (d, *J* = 8.7 Hz, 2H), 4.98 (s, 2H), 4.53 (dd, *J* = 4.4, 2.1 Hz, 1H), 4.30 (s, 1H), 4.10 (t, *J* = 6.8 Hz, 2H), 3.40 – 3.32 (m, 3H), 2.37 (t, *J* = 7.2 Hz, 2H), 1.61 – 1.54 (m, 2H), 1.53 (s, 3H), 1.48 (p, *J* = 7.4 Hz, 2H), 1.33 (s, 3H), 1.23 (dq, *J* = 38.7, 8.2 Hz, 4H).

**<sup>13</sup>C NMR (176 MHz, CDCl<sub>3</sub>)** δ 206.7 (dd, *J* = 2.3, 2.8 Hz), 170.8, 167.0, 158.1, 154.6 (dd, *J* = 293.5, 293.5 Hz), 136.8, 129.1 (t, *J* = 3.5 Hz), 128.6, 128.1, 127.5, 125.5 (t, *J* = 3.5 Hz), 115.0, 86.8 (dd, *J* = 22.0, 22.3 Hz), 70.0, 66.4, 63.3, 62.7, 61.1, 42.3 (d, *J* = 1.7 Hz), 41.6, 38.3, 28.5, 28.2, 25.7, 23.3, 20.4, 18.6.

**<sup>19</sup>F NMR (56 MHz, Chloroform-*d*)** δ -88.6 (d, *J* = 39.2 Hz), -89.9 (d, *J* = 39.2 Hz).

**HRMS (ESI-TOF)** *m/z*: [M + H]<sup>+</sup> Calcd for C<sub>31</sub>H<sub>35</sub>F<sub>2</sub>NO<sub>7</sub>S 604.2175; Found: 604.2173.

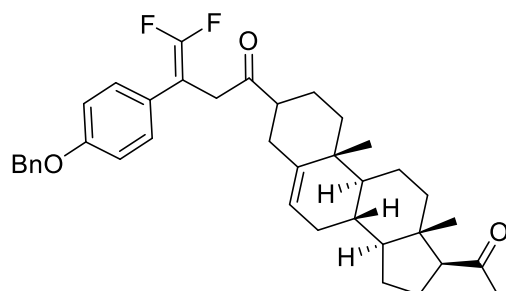

**1-((8S,9S,10R,13S,14S,17S)-17-acetyl-10,13-dimethyl-2,3,4,7,8,9,10,11,12,13,14,15,16,17-tetradecahydro-1H-cyclopenta[a]phenanthren-3-yl)-3-(4-(benzyloxy)phenyl)-4,4-difluorobut-3-en-1-one (3ay)**

The title compound was prepared from 1-(benzyloxy)-4-(3,3,3-trifluoroprop-1-en-2-yl)benzene (55 mg, 0.20 mmol) and Pregnenolone iodide (85 mg, 0.20 mmol) according to general procedure 1. The crude residue was purified by flash chromatography (PE/EA = 10:1) to give the product as a colorless oil (47 mg, 40%).

**<sup>1</sup>H NMR (700 MHz, Chloroform-*d*)** δ 7.35 (d, *J* = 7.6 Hz, 2H), 7.31 (t, *J* = 7.5 Hz, 2H), 7.25 (t, *J* = 7.3 Hz, 1H), 7.12 (t, *J* = 8.6 Hz, 2H), 6.86 (t, *J* = 8.7 Hz, 2H), 5.26 (t, *J* = 6.4 Hz, 1H), 4.97 (s, 2H), 3.52 – 3.32 (m, 2H), 2.57 – 2.53 (m, 1H), 2.48 – 2.42 (m, 1H), 2.40 – 2.33 (m, 1H), 2.15 – 2.07 (m, 1H), 2.04 (d, *J* = 9.7 Hz, 3H), 2.00 – 1.87 (m, 3H), 1.62 – 1.49 (m, 5H), 1.36 (ddt, *J* = 22.1, 15.3, 6.3 Hz, 3H), 1.21 – 1.11 (m, 2H), 1.09 – 1.03 (m, 1H), 0.92 (d, *J* = 20.1 Hz, 4H), 0.83 – 0.71 (m, 1H), 0.55 (d, *J* = 10.7 Hz, 3H).

**<sup>13</sup>C NMR (176 MHz, CDCl<sub>3</sub>)** δ 209.6, 208.3 (dd, *J* = 3.0, 2.3 Hz), 158.0, 154.5 (dd, *J* = 291.8, 291.8 Hz), 141.1, 139.7, 136.8, 129.1 (t, *J* = 4.2 Hz), 128.6, 128.1, 127.5, 126.0 (t, *J* = 4.2 Hz), 121.7, 120.9, 114.9, 114.8, 86.7 (dd, *J* = 22.1, 22.8 Hz), 70.0, 63.7, 56.9, 51.3, 50.2, 49.9, 47.4, 44.0, 40.7, 40.0 (d, *J* = 1.7 Hz), 37.1, 37.0, 35.6, 34.3, 33.4, 31.8, 31.7, 31.7, 31.7, 31.6, 31.6, 26.9, 24.8, 24.5, 22.9, 22.8, 22.8, 20.9, 20.7, 19.4, 19.3, 13.2.

**<sup>19</sup>F NMR (56 MHz, Chloroform-*d*)** δ -88.9 (d, *J* = 44.4 Hz), -90.2 (d, *J* = 41.2 Hz).

**HRMS (ESI-TOF)** *m/z*: [M + H]<sup>+</sup> Calcd for C<sub>38</sub>H<sub>44</sub>F<sub>2</sub>O<sub>3</sub> 587.3331; Found: 587.3330.

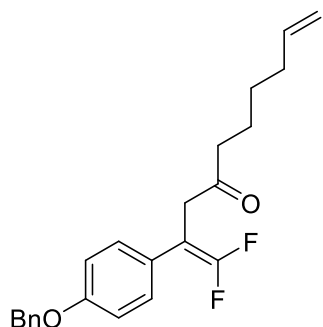

### 2-(4-(benzyloxy)phenyl)-1,1-difluorodeca-1,9-dien-4-one (3az)

The title compound was prepared from 1-(benzyloxy)-4-(3,3,3-trifluoroprop-1-en-2-yl)benzene (55 mg, 0.20 mmol) and 6-iodohex-1-ene (42 mg, 0.20 mmol) according to general procedure 1. The crude residue was purified by flash chromatography (PE/EA = 50:1) to give the product as a colorless oil (12 mg, 16%).

**<sup>1</sup>H NMR (700 MHz, Chloroform-*d*)**  $\delta$  7.35 (d, *J* = 7.6 Hz, 2H), 7.31 (t, *J* = 7.5 Hz, 2H), 7.26 (t, *J* = 7.3 Hz, 1H), 7.14 (d, *J* = 8.4 Hz, 2H), 6.87 (d, *J* = 8.4 Hz, 2H), 5.69 (ddt, *J* = 16.9, 10.2, 6.7 Hz, 1H), 4.98 (s, 2H), 4.94 – 4.84 (m, 2H), 3.33 (s, 2H), 2.36 (q, *J* = 7.3 Hz, 2H), 1.95 (q, *J* = 7.2 Hz, 2H), 1.53 – 1.48 (m, 2H), 1.26 (p, *J* = 7.5 Hz, 2H).

**<sup>13</sup>C NMR (176 MHz, CDCl<sub>3</sub>)**  $\delta$  206.8 (dd, *J* = 2.9, 2.9 Hz), 158.1, 154.5 (dd, *J* = 292.7, 292.9 Hz), 138.4, 136.8, 129.1 (t, *J* = 2.7 Hz), 128.6, 128.1, 127.5, 125.6 (t, *J* = 4.0 Hz), 115.0, 114.7, 86.8 (dd, *J* = 21.7, 22.2 Hz), 70.0, 42.3 (d, *J* = 2.0 Hz), 41.7, 33.5, 28.3, 23.1.

**<sup>19</sup>F NMR (56 MHz, Chloroform-*d*)**  $\delta$  -88.6 (d, *J* = 38.9 Hz), -89.9 (d, *J* = 39.6 Hz).

**HRMS (ESI-TOF)** *m/z*: [M + H]<sup>+</sup> Calcd for C<sub>23</sub>H<sub>24</sub>F<sub>2</sub>O<sub>2</sub> 371.1817; Found: 371.1815.

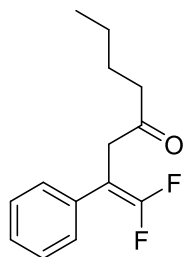

### 1,1-difluoro-2-phenyloct-1-en-4-one (3ba)

The title compound was prepared from (3,3,3-trifluoroprop-1-en-2-yl)benzene (35 mg, 0.20 mmol) and 1-iodobutane (37 mg, 0.20 mmol) according to general procedure 1. The crude residue was purified by flash chromatography (PE/EA = 40:1) to give the product as a colorless oil (39 mg, 82%).

**<sup>1</sup>H NMR (700 MHz, Chloroform-*d*)**  $\delta$  7.25 (t, *J* = 7.7 Hz, 2H), 7.22 – 7.19 (m, 2H), 7.19 – 7.16 (m, 1H), 3.36 (s, 2H), 2.35 (t, *J* = 7.5 Hz, 2H), 1.48 – 1.42 (m, 2H), 1.19 (q, *J* = 7.5 Hz, 2H), 0.79 (t, *J* = 7.4 Hz, 3H).

**<sup>13</sup>C NMR (176 MHz, CDCl<sub>3</sub>)**  $\delta$  206.7 (dd, *J* = 2.8, 2.9 Hz), 154.8 (dd, *J* = 293.5, 293.5 Hz), 133.3 (t, *J* = 4.1 Hz), 128.6, 127.9 (t, *J* = 3.7 Hz), 127.5, 87.3 (dd, *J* = 22.2, 22.7 Hz), 42.2 (d, *J* = 2.0 Hz), 41.8, 25.7, 22.2, 13.8.

**<sup>19</sup>F NMR (56 MHz, Chloroform-*d*)**  $\delta$  -87.7 (d, *J* = 36.5 Hz), -89.2 (d, *J* = 36.5 Hz).

**HRMS (ESI-TOF)** *m/z*: [M + H]<sup>+</sup> Calcd for C<sub>14</sub>H<sub>16</sub>F<sub>2</sub>O 239.1242; Found: 239.1239.

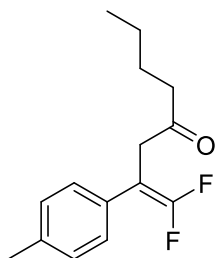

**1,1-difluoro-2-(*p*-tolyl)oct-1-en-4-one (3ca)**

The title compound was prepared from 1-methyl-4-(3,3,3-trifluoroprop-1-en-2-yl)benzene (37 mg, 0.20 mmol) and 1-iodobutane (37 mg, 0.20 mmol) according to general procedure 1. The crude residue was purified by flash chromatography (PE/EA = 50:1) to give the product as a colorless oil (37 mg, 74%).

**<sup>1</sup>H NMR (700 MHz, Chloroform-*d*)**  $\delta$  7.10 (d, *J* = 8.0 Hz, 2H), 7.07 (d, *J* = 8.0 Hz, 2H), 3.35 (s, 2H), 2.35 (t, *J* = 7.4 Hz, 2H), 2.25 (s, 3H), 1.45 (p, *J* = 7.5 Hz, 2H), 1.19 (h, *J* = 7.4 Hz, 2H), 0.79 (t, *J* = 7.4 Hz, 3H).

**<sup>13</sup>C NMR (176 MHz, CDCl<sub>3</sub>)**  $\delta$  206.9 (dd, *J* = 3.0, 3.0 Hz), 154.7 (dd, *J* = 292.5, 292.8 Hz), 137.4, 130.2 (t, *J* = 4.5 Hz), 129.3, 127.7 (t, *J* = 3.9 Hz), 87.1 (dd, *J* = 21.7, 22.0 Hz), 42.2 (d, *J* = 2.0 Hz), 41.7, 25.7, 22.2, 21.1, 13.8.

**<sup>19</sup>F NMR (56 MHz, Chloroform-*d*)**  $\delta$  -88.1 (d, *J* = 39.3 Hz), -89.5 (d, *J* = 39.3 Hz).

**HRMS (ESI-TOF)** *m/z*: [M + H]<sup>+</sup> Calcd for C<sub>15</sub>H<sub>18</sub>F<sub>2</sub>O 253.1398; Found: 253.1398.

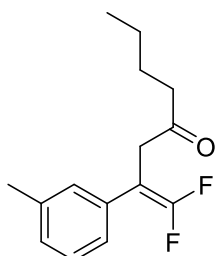

**1,1-difluoro-2-(*m*-tolyl)oct-1-en-4-one (3da)**

The title compound was prepared from 1-methyl-3-(3,3,3-trifluoroprop-1-en-2-yl)benzene (37 mg, 0.20 mmol) and 1-iodobutane (37 mg, 0.20 mmol) according to general procedure 1. The crude residue was purified by flash chromatography (PE/EA = 50:1) to give the product as a colorless oil (30 mg, 60%).

**<sup>1</sup>H NMR (700 MHz, Chloroform-*d*)**  $\delta$  7.22 (t, *J* = 7.7 Hz, 1H), 7.13 – 7.05 (m, 3H), 3.43 (s, 2H), 2.43 (t, *J* = 7.4 Hz, 2H), 2.33 (s, 3H), 1.53 (p, *J* = 7.5 Hz, 2H), 1.31 – 1.22 (m, 2H), 0.87 (t, *J* = 7.4 Hz, 3H).

**<sup>13</sup>C NMR (176 MHz, CDCl<sub>3</sub>)**  $\delta$  206.8 (dd, *J* = 2.7, 3.0 Hz), 154.7 (dd, *J* = 293.1, 293.1 Hz), 138.2, 133.2 (t, *J* = 3.5 Hz), 128.6 (t, *J* = 4.2 Hz), 128.5, 128.3, 124.9 (t, *J* = 3.5 Hz), 87.3 (dd, *J* = 21.6, 21.6 Hz), 42.2 (d, *J* = 1.9 Hz), 41.8, 25.7, 22.2, 21.4, 13.8.

**<sup>19</sup>F NMR (56 MHz, Chloroform-*d*)**  $\delta$  -87.8 (d, *J* = 38.4 Hz), -89.1 (d, *J* = 37.7 Hz).

**HRMS (ESI-TOF)** *m/z*: [M + H]<sup>+</sup> Calcd for C<sub>15</sub>H<sub>18</sub>F<sub>2</sub>O 253.1398; Found: 253.1399.

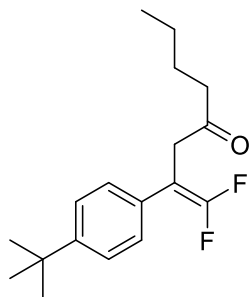

### 2-(4-(*tert*-butyl)phenyl)-1,1-difluorooct-1-en-4-one (3ea)

The title compound was prepared from 1-(*tert*-butyl)-4-(3,3,3-trifluoroprop-1-en-2-yl)benzene (46 mg, 0.20 mmol) and 1-iodobutane (37 mg, 0.20 mmol) according to general procedure 1. The crude residue was purified by flash chromatography (PE/EA = 50:1) to give the product as a colorless oil (44 mg, 75%).

**<sup>1</sup>H NMR (700 MHz, Chloroform-*d*)**  $\delta$  7.39 (d, *J* = 8.8 Hz, 2H), 7.27 – 7.20 (m, 2H), 3.46 (s, 2H), 2.47 (t, *J* = 7.9 Hz, 2H), 1.34 (s, 9H), 1.35 – 1.30 (m, 4H), 0.91 – 0.89 (m, 3H).

**<sup>13</sup>C NMR (176 MHz, CDCl<sub>3</sub>)**  $\delta$  207.0 (dd, *J* = 2.1, 3.2 Hz), 154.8 (dd, *J* = 294.0, 292.6 Hz), 150.5, 130.2 (t, *J* = 4.4 Hz), 127.4 (t, *J* = 3.8 Hz), 125.5, 87.1 (dd, *J* = 21.6, 21.9 Hz), 42.1 (d, *J* = 2.0 Hz), 41.7, 34.5, 31.2, 25.7, 22.2, 13.8.

**<sup>19</sup>F NMR (56 MHz, Chloroform-*d*)**  $\delta$  -87.9 (d, *J* = 37.7 Hz), -89.2 (d, *J* = 37.7 Hz).

**HRMS (ESI-TOF)** *m/z*: [M + H]<sup>+</sup> Calcd for C<sub>18</sub>H<sub>24</sub>F<sub>2</sub>O 295.1868; Found: 295.1863.

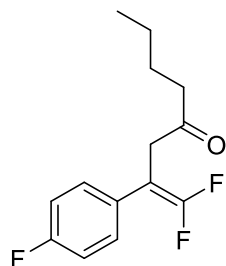

### 1,1-difluoro-2-(4-fluorophenyl)oct-1-en-4-one (3fa)

The title compound was prepared from 1-fluoro-4-(3,3,3-trifluoroprop-1-en-2-yl)benzene (38 mg, 0.20 mmol) and 1-iodobutane (37 mg, 0.20 mmol) according to general procedure 1. The crude residue was purified by flash chromatography (PE/EA = 50:1) to give the product as a colorless oil (26 mg, 51%).

**<sup>1</sup>H NMR (700 MHz, Chloroform-*d*)**  $\delta$  7.18 (ddd, *J* = 8.8, 5.1, 1.1 Hz, 2H), 6.95 (t, *J* = 8.7 Hz, 2H), 3.35 (s, 2H), 2.36 (t, *J* = 7.5 Hz, 2H), 1.46 (p, *J* = 7.5 Hz, 2H), 1.24 – 1.16 (m, 2H), 0.80 (t, *J* = 7.4 Hz, 3H).

**<sup>13</sup>C NMR (176 MHz, CDCl<sub>3</sub>)**  $\delta$  206.6 (dd, *J* = 2.6, 3.0 Hz), 162.0 (d, *J* = 248.5 Hz), 154.7 (dd, *J* = 293.7, 293.2 Hz), 129.7 (dt, *J* = 8.0, 7.5 Hz), 129.2 (q, *J* = 4.0 Hz), 115.6 (d, *J* = 21.7 Hz), 86.5 (dd, *J* = 22.4, 22.6 Hz), 42.2 (d, *J* = 1.8 Hz), 41.9, 25.7, 22.2, 13.8.

**<sup>19</sup>F NMR (56 MHz, Chloroform-*d*)**  $\delta$  -87.9 (d, *J* = 35.3 Hz), -89.2 (d, *J* = 35.3 Hz), -113.7 (s).

**HRMS (ESI-TOF)** *m/z*: [M + H]<sup>+</sup> Calcd for C<sub>14</sub>H<sub>15</sub>F<sub>3</sub>O 257.1148; Found: 257.1144.

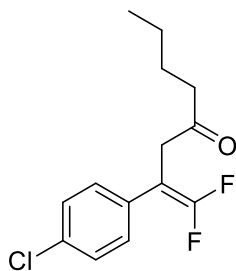

### 2-(4-chlorophenyl)-1,1-difluorooct-1-en-4-one (3ga)

The title compound was prepared from 1-chloro-4-(3,3,3-trifluoroprop-1-en-2-yl)benzene (42 mg, 0.20 mmol) and 1-iodobutane (37 mg, 0.20 mmol) according to general procedure 1. The crude residue was purified by flash chromatography (PE/EA = 50:1) to give the product as a colorless oil (30 mg, 55%).

$^1\text{H NMR}$  (700 MHz, Chloroform-*d*)  $\delta$  7.23 (d,  $J$  = 8.4 Hz, 2H), 7.15 (d,  $J$  = 8.2 Hz, 2H), 3.35 (s, 2H), 2.36 (t,  $J$  = 7.5 Hz, 2H), 1.46 (p,  $J$  = 7.5 Hz, 2H), 1.21 (dt,  $J$  = 15.1, 7.5 Hz, 2H), 0.81 (t,  $J$  = 7.4 Hz, 3H).

$^{13}\text{C NMR}$  (176 MHz,  $\text{CDCl}_3$ )  $\delta$  206.4 (dd,  $J$  = 2.6, 3.0 Hz), 154.8 (dd,  $J$  = 293.1, 294.1 Hz), 133.4, 129.2 (t,  $J$  = 3.8 Hz), 128.9, 128.8, 86.6 (dd,  $J$  = 23.2, 22.4 Hz), 42.0 (d,  $J$  = 1.8 Hz), 41.9, 25.7, 22.2, 13.8.

$^{19}\text{F NMR}$  (56 MHz, Chloroform-*d*)  $\delta$  -87.0 (d,  $J$  = 36.6 Hz), -88.3 (d,  $J$  = 35.8 Hz).

HRMS (ESI-TOF)  $m/z$ : [M + H]<sup>+</sup> Calcd for  $\text{C}_{14}\text{H}_{15}\text{ClF}_2\text{O}$  273.0852; Found: 273.0848.

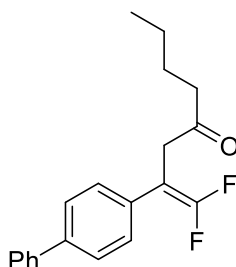

### 2-([1,1'-biphenyl]-4-yl)-1,1-difluorooct-1-en-4-one (3ha)

The title compound was prepared from 4-(3,3,3-trifluoroprop-1-en-2-yl)-1,1'-biphenyl (50 mg, 0.20 mmol) and 1-iodobutane (37 mg, 0.20 mmol) according to general procedure 1. The crude residue was purified by flash chromatography (PE/EA = 50:1) to give the product as a colorless oil (43 mg, 69%).

$^1\text{H NMR}$  (700 MHz, Chloroform-*d*)  $\delta$  7.49 (td,  $J$  = 8.3, 4.0 Hz, 4H), 7.35 (t,  $J$  = 7.6 Hz, 2H), 7.30 – 7.23 (m, 3H), 3.40 (s, 2H), 2.38 (t,  $J$  = 7.5 Hz, 2H), 1.48 (dd,  $J$  = 15.2, 7.6 Hz, 2H), 1.20 (dt,  $J$  = 14.7, 7.3 Hz, 2H), 0.80 (t,  $J$  = 7.4 Hz, 3H).

$^{13}\text{C NMR}$  (176 MHz,  $\text{CDCl}_3$ )  $\delta$  206.8 (dd,  $J$  = 2.9, 2.7 Hz), 154.9 (dd,  $J$  = 293.5, 294.4 Hz), 140.4, 140.3, 132.2 (t,  $J$  = 4.1 Hz), 128.8, 128.2 (t,  $J$  = 3.8 Hz), 127.5, 127.3, 127.0, 87.1 (dd,  $J$  = 21.8, 22.1 Hz), 42.1 (d,  $J$  = 1.5 Hz), 41.8, 25.8, 22.3, 13.8.

$^{19}\text{F NMR}$  (56 MHz, Chloroform-*d*)  $\delta$  -87.1 (d,  $J$  = 34.8 Hz), -88.4 (d,  $J$  = 37.7 Hz).

HRMS (ESI-TOF)  $m/z$ : [M + H]<sup>+</sup> Calcd for  $\text{C}_{20}\text{H}_{20}\text{F}_2\text{O}$  315.1555; Found: 315.1557.



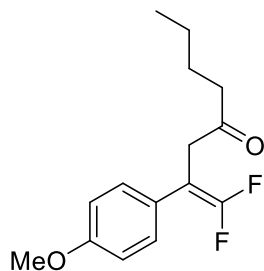

**1,1-difluoro-2-(4-methoxyphenyl)oct-1-en-4-one (3ia)**

The title compound was prepared from 1-methoxy-4-(3,3,3-trifluoroprop-1-en-2-yl)benzene (41 mg, 0.20 mmol) and 1-iodobutane (37 mg, 0.20 mmol) according to general procedure 1. The crude residue was purified by flash chromatography (PE/EA = 40:1) to give the product as a colorless oil (33 mg, 62%).

**<sup>1</sup>H NMR (700 MHz, Chloroform-*d*)**  $\delta$  7.14 (d, *J* = 8.5 Hz, 2H), 6.80 (d, *J* = 8.7 Hz, 2H), 3.72 (s, 3H), 3.34 (s, 2H), 2.35 (t, *J* = 7.4 Hz, 2H), 1.45 (p, *J* = 7.5 Hz, 2H), 1.22 – 1.18 (m, 2H), 0.80 (t, *J* = 7.4 Hz, 3H).

**<sup>13</sup>C NMR (176 MHz, CDCl<sub>3</sub>)**  $\delta$  206.0 (dd, *J* = 2.9, 3.3 Hz), 157.8, 153.5 (dd, *J* = 292.0, 292.0 Hz), 128.0 (t, *J* = 3.3 Hz), 124.3 (t, *J* = 3.9 Hz), 113.0, 85.8 (dd, *J* = 22.2, 21.6 Hz), 54.2, 41.3 (d, *J* = 2.0 Hz), 40.7, 24.7, 21.2, 12.8.

**<sup>19</sup>F NMR (56 MHz, Chloroform-*d*)**  $\delta$  -88.8 (d, *J* = 39.6 Hz), -90.0 (d, *J* = 39.6 Hz).

**HRMS (ESI-TOF)** *m/z*: [M + H]<sup>+</sup> Calcd for C<sub>15</sub>H<sub>18</sub>F<sub>2</sub>O<sub>2</sub> 269.1348; Found: 269.1347.

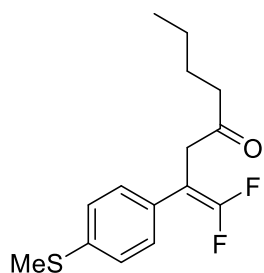

**1,1-difluoro-2-(4-(methylthio)phenyl)oct-1-en-4-one (3ja)**

The title compound was prepared from methyl(4-(3,3,3-trifluoroprop-1-en-2-yl)phenyl)sulfane (44 mg, 0.20 mmol) and 1-iodobutane (37 mg, 0.20 mmol) according to general procedure 1. The crude residue was purified by flash chromatography (PE/EA = 50:1) to give the product as a colorless oil (28 mg, 49%).

**<sup>1</sup>H NMR (700 MHz, Chloroform-*d*)**  $\delta$  7.12-7.15 (m, 4H), 3.35 (s, 2H), 2.40 (s, 3H), 2.36 (t, *J* = 7.4 Hz, 2H), 1.46 (p, *J* = 7.5 Hz, 2H), 1.22 – 1.17 (m, 2H), 0.80 (t, *J* = 7.4 Hz, 3H).

**<sup>13</sup>C NMR (176 MHz, CDCl<sub>3</sub>)**  $\delta$  206.7 (dd, *J* = 2.6, 2.6 Hz), 154.7 (dd, *J* = 293.1, 293.4 Hz), 138.0, 129.8 (t, *J* = 4.3 Hz), 128.2 (t, *J* = 4.3 Hz), 126.5, 86.9 (dd, *J* = 22.3, 22.3 Hz), 42.0 (d, *J* = 1.9 Hz), 41.8, 25.7, 22.2, 15.6, 13.8.

**<sup>19</sup>F NMR (56 MHz, Chloroform-*d*)**  $\delta$  -87.3 (d, *J* = 38.3 Hz), -88.6 (d, *J* = 39.6 Hz).

**HRMS (ESI-TOF)** *m/z*: [M + H]<sup>+</sup> Calcd for C<sub>15</sub>H<sub>18</sub>F<sub>2</sub>OS 285.1119; Found: 285.1120.

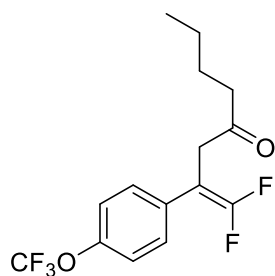

**1,1-difluoro-2-(4-(trifluoromethoxy)phenyl)oct-1-en-4-one (3ka)**

The title compound was prepared from 1-(trifluoromethoxy)-4-(3,3,3-trifluoroprop-1-en-2-yl)benzene (51 mg, 0.20 mmol) and 1-iodobutane (37 mg, 0.20 mmol) according to general procedure 1. The crude residue was purified by flash chromatography (PE/EA = 50:1) to give the product as a colorless oil (32 mg, 50%).

<sup>1</sup>H NMR (700 MHz, Chloroform-*d*) δ 7.24 (d, *J* = 8.4 Hz, 2H), 7.11 (d, *J* = 8.3 Hz, 2H), 3.37 (s, 2H), 2.37 (t, *J* = 7.4 Hz, 2H), 1.47 (p, *J* = 7.4 Hz, 2H), 1.20 (h, *J* = 7.4 Hz, 2H), 0.81 (t, *J* = 7.4 Hz, 3H).

<sup>13</sup>C NMR (176 MHz, CDCl<sub>3</sub>) δ 206.4 (dd, *J* = 2.8, 2.8 Hz), 154.8 (dd, *J* = 294.0, 293.4 Hz), 130.4, 129.4 (t, *J* = 4.0 Hz), 121.0, 120.3 (q, *J* = 257.2 Hz), 86.4 (dd, *J* = 22.9, 23.4 Hz), 42.0 (d, *J* = 2.0 Hz), 41.9, 25.7, 22.2, 13.8.

<sup>19</sup>F NMR (56 MHz, Chloroform-*d*) δ -57.5 (s), -86.9 (d, *J* = 36.0 Hz), -88.4 (d, *J* = 34.7 Hz).

HRMS (ESI-TOF) *m/z*: [M + H]<sup>+</sup> Calcd for C<sub>15</sub>H<sub>15</sub>F<sub>5</sub>O<sub>2</sub> 323.1065; Found: 323.1066.

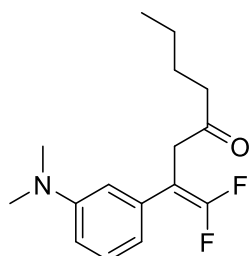

**2-(3-(dimethylamino)phenyl)-1,1-difluorooct-1-en-4-one (3la)**

The title compound was prepared from *N,N*-dimethyl-3-(3,3,3-trifluoroprop-1-en-2-yl)aniline (43 mg, 0.20 mmol) and 1-iodobutane (37 mg, 0.20 mmol) according to general procedure 1. The crude residue was purified by flash chromatography (PE/EA = 10:1) to give the product as a colorless oil (23 mg, 41%).

<sup>1</sup>H NMR (700 MHz, Chloroform-*d*) δ 7.12 (ddd, *J* = 8.5, 6.6, 1.8 Hz, 1H), 6.56 (q, *J* = 7.3 Hz, 3H), 3.35 (s, 2H), 2.86 (s, 6H), 2.36 (t, *J* = 7.4 Hz, 2H), 1.46 (p, *J* = 7.5 Hz, 2H), 1.24 – 1.17 (m, 2H), 0.80 (t, *J* = 7.4 Hz, 3H).

<sup>13</sup>C NMR (176 MHz, CDCl<sub>3</sub>) δ 207.1 (dd, *J* = 2.5, 3.3 Hz), 154.7 (dd, *J* = 292.1, 292.4 Hz), 150.6, 134.0 (t, *J* = 4.0 Hz), 129.2, 116.1, 112.1, 111.9, 87.8 (dd, *J* = 22.3, 21.4 Hz), 42.5 (d, *J* = 1.8 Hz), 41.7, 40.5, 25.8, 22.2, 13.8.

<sup>19</sup>F NMR (56 MHz, Chloroform-*d*) δ -88.4.

HRMS (ESI-TOF) *m/z*: [M + H]<sup>+</sup> Calcd for C<sub>16</sub>H<sub>21</sub>F<sub>2</sub>NO 282.1664; Found: 282.1667.

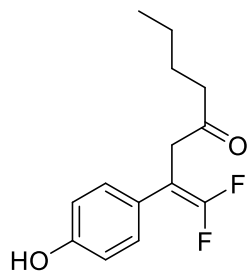

**1,1-difluoro-2-(4-hydroxyphenyl)oct-1-en-4-one (3ma)**

The title compound was prepared from 4-(3,3,3-trifluoroprop-1-en-2-yl)phenol (38 mg, 0.20 mmol) and 1-iodobutane (37 mg, 0.20 mmol) according to general procedure 1. The crude residue was purified by flash chromatography (PE/EA = 5:1) to give the product as a colorless oil (24 mg, 48%).

**<sup>1</sup>H NMR (400 MHz, Chloroform-*d*)**  $\delta$  7.05 (d, *J* = 8.4 Hz, 2H), 6.67 (d, *J* = 8.6 Hz, 2H), 5.85 (s, 1H), 3.36 (s, 2H), 2.38 (t, *J* = 7.4 Hz, 2H), 1.46 (p, *J* = 7.4 Hz, 2H), 1.18 (dt, *J* = 14.5, 7.4 Hz, 2H), 0.79 (t, *J* = 7.3 Hz, 3H).

**<sup>13</sup>C NMR (101 MHz, CDCl<sub>3</sub>)**  $\delta$  208.7 (dd, *J* = 2.3, 3.1 Hz), 155.3, 154.6 (dd, *J* = 292.5, 292.5 Hz), 129.1 (t, *J* = 3.7 Hz), 124.9 (t, *J* = 3.9 Hz), 115.6, 86.8 (dd, *J* = 21.8, 22.0 Hz), 42.3 (d, *J* = 1.9 Hz), 41.7, 25.7, 22.2, 13.8.

**<sup>19</sup>F NMR (56 MHz, Chloroform-*d*)**  $\delta$  -88.7 (d, *J* = 39.5 Hz), -89.9 (d, *J* = 39.5 Hz).

**HRMS (ESI-TOF)** *m/z*: [M + H]<sup>+</sup> Calcd for C<sub>14</sub>H<sub>16</sub>F<sub>2</sub>O<sub>2</sub> 255.1191; Found: 255.1188.

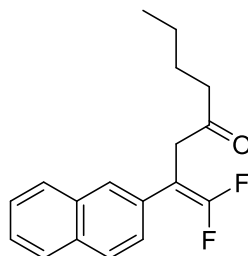

**1,1-difluoro-2-(naphthalen-2-yl)oct-1-en-4-one (3na)**

The title compound was prepared from 2-(3,3,3-trifluoroprop-1-en-2-yl)naphthalene (45 mg, 0.20 mmol) and 1-iodobutane (37 mg, 0.20 mmol) according to general procedure 1. The crude residue was purified by flash chromatography (PE/EA = 50:1) to give the product as a colorless oil (19 mg, 33%).

**<sup>1</sup>H NMR (700 MHz, Chloroform-*d*)**  $\delta$  7.75 – 7.70 (m, 3H), 7.65 (d, *J* = 1.8 Hz, 1H), 7.43 – 7.38 (m, 2H), 7.36 (dt, *J* = 8.5, 1.8 Hz, 1H), 3.47 (s, 2H), 2.41 – 2.31 (m, 2H), 1.46 (p, *J* = 7.5 Hz, 2H), 1.22 – 1.16 (m, 2H), 0.79 (t, *J* = 7.4 Hz, 3H).

**<sup>13</sup>C NMR (176 MHz, CDCl<sub>3</sub>)**  $\delta$  206.8 (dd, *J* = 2.8, 2.8 Hz), 155.0 (dd, *J* = 293.4, 293.7 Hz), 133.2, 132.5, 130.7 (t, *J* = 3.9 Hz), 128.3, 128.0, 127.6, 127.0 (t, *J* = 3.5 Hz), 126.4, 126.3, 125.6 (dd, *J* = 4.5, 4.5 Hz), 87.4 (dd, *J* = 21.7, 22.0 Hz), 42.3 (d, *J* = 1.7 Hz), 41.8, 25.8, 22.2, 13.8.

**<sup>19</sup>F NMR (56 MHz, Chloroform-*d*)**  $\delta$  -87.1 (d, *J* = 35.8 Hz), -88.6 (d, *J* = 35.8 Hz).

**HRMS (ESI-TOF)** *m/z*: [M + H]<sup>+</sup> Calcd for C<sub>18</sub>H<sub>18</sub>F<sub>2</sub>O 289.1398; Found: 289.1394.

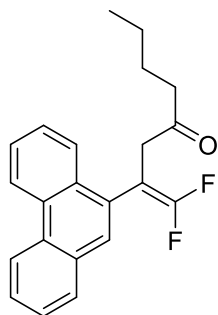

### 1,1-difluoro-2-(phenanthren-9-yl)oct-1-en-4-one (30a)

The title compound was prepared from 9-(3,3,3-trifluoroprop-1-en-2-yl)phenanthrene (55 mg, 0.20 mmol) and 1-iodobutane (37 mg, 0.20 mmol) according to general procedure 1. The crude residue was purified by flash chromatography (PE/EA = 50:1) to give the product as a colorless oil (47 mg, 70%).

**<sup>1</sup>H NMR (700 MHz, Chloroform-*d*)**  $\delta$  8.65 (d, *J* = 8.2 Hz, 1H), 8.58 (d, *J* = 8.3 Hz, 1H), 7.89 (d, *J* = 8.0 Hz, 1H), 7.79 (d, *J* = 7.8 Hz, 1H), 7.67 (s, 1H), 7.63 – 7.54 (m, 3H), 7.51 (t, *J* = 7.4 Hz, 1H), 3.45 (d, *J* = 127.8 Hz, 2H), 2.29 (dt, *J* = 15.0, 6.9 Hz, 2H), 1.41 (p, *J* = 7.5 Hz, 2H), 1.14 (h, *J* = 7.5 Hz, 2H), 0.73 (t, *J* = 7.3 Hz, 3H).

**<sup>13</sup>C NMR (176 MHz, CDCl<sub>3</sub>)**  $\delta$  205.0 (dd, *J* = 3.0, 3.1 Hz), 154.0 (dd, *J* = 290.5, 290.3 Hz), 130.2, 129.7, 129.2, 129.0 (d, *J* = 2.8 Hz), 128.4 (d, *J* = 4.7 Hz), 128.0 (dd, *J* = 3.0, 2.7 Hz), 127.8, 126.1, 125.9, 125.8, 125.7, 124.4, 122.2, 121.4, 83.9 (t, *J* = 22.4 Hz), 41.9, 41.4, 24.7, 21.1, 12.7.

**<sup>19</sup>F NMR (56 MHz, Chloroform-*d*)**  $\delta$  -86.4 (d, *J* = 35.6 Hz), -89.1 (d, *J* = 38.3 Hz).

**HRMS (ESI-TOF)** *m/z*: [M + H]<sup>+</sup> Calcd for C<sub>22</sub>H<sub>20</sub>F<sub>2</sub>O 339.1555; Found: 339.1556.

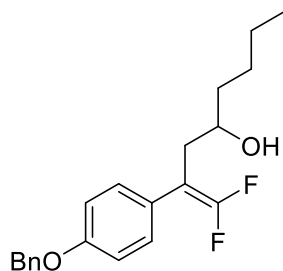

### 2-(4-(benzyloxy)phenyl)-1,1-difluorooct-1-en-4-ol (4a)

The title compound was prepared from **3aa** (69 mg, 0.20 mmol) general procedure 3. The crude residue was purified by flash chromatography (PE/EA = 10:1) to give the product as a colorless oil (69 mg, 99%).

**<sup>1</sup>H NMR (700 MHz, Chloroform-*d*)**  $\delta$  7.42 (d, *J* = 7.6 Hz, 2H), 7.38 (t, *J* = 7.5 Hz, 2H), 7.32 (t, *J* = 7.3 Hz, 1H), 7.25 (d, *J* = 8.4 Hz, 2H), 6.96 (d, *J* = 8.4 Hz, 2H), 5.05 (s, 2H), 3.61 – 3.53 (m, 1H), 2.50 (d, *J* = 5.6 Hz, 2H), 1.51 – 1.35 (m, 4H), 1.27 (ddt, *J* = 21.3, 14.2, 7.2 Hz, 3H), 0.87 (t, *J* = 7.0 Hz, 3H).

**<sup>13</sup>C NMR (176 MHz, CDCl<sub>3</sub>)**  $\delta$  158.1, 154.3 (dd, *J* = 290.8, 290.1 Hz), 136.8, 129.5 (t, *J* = 3.3 Hz), 128.6, 128.1, 127.5, 125.8 (t, *J* = 4.0 Hz), 115.0, 89.4 (dd, *J* = 21.0, 21.5 Hz), 70.1, 69.9 (t, *J* = 2.5 Hz), 36.7, 36.0, 27.7, 22.7, 14.0.

**<sup>19</sup>F NMR (56 MHz, Chloroform-*d*)**  $\delta$  -90.3.

**HRMS (ESI-TOF)** *m/z*: [M + H]<sup>+</sup> Calcd for C<sub>21</sub>H<sub>24</sub>F<sub>2</sub>O<sub>2</sub> 347.1817; Found: 347.1815.

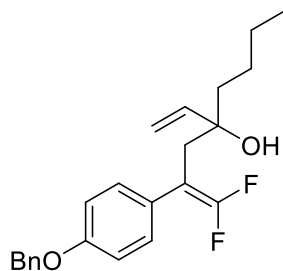

**2-(4-(benzyloxy)phenyl)-1,1-difluoro-4-vinyloct-1-en-4-ol (4b)**

The title compound was prepared from **3aa** (69 mg, 0.20 mmol) general procedure 2. The crude residue was purified by flash chromatography (PE/EA = 20:1) to give the product as a colorless oil (49 mg, 66%).

**<sup>1</sup>H NMR (700 MHz, Chloroform-*d*)**  $\delta$  7.34 (d, *J* = 7.2 Hz, 2H), 7.30 (t, *J* = 7.5 Hz, 2H), 7.24 (t, *J* = 7.2 Hz, 1H), 7.14 (d, *J* = 8.4 Hz, 2H), 6.87 (d, *J* = 8.8 Hz, 2H), 5.64 (dd, *J* = 17.3, 10.8 Hz, 1H), 5.04 (dd, *J* = 17.3, 1.4 Hz, 1H), 4.96 (d, *J* = 10.4 Hz, 3H), 2.54 (s, 2H), 1.43 (ddd, *J* = 13.3, 11.3, 4.1 Hz, 1H), 1.38 – 1.32 (m, 1H), 1.18 (s, 1H), 1.13 (dddd, *J* = 15.1, 9.7, 6.6, 2.3 Hz, 4H), 0.76 (t, *J* = 7.1 Hz, 3H).

**<sup>13</sup>C NMR (176 MHz, CDCl<sub>3</sub>)**  $\delta$  158.1, 154.5 (dd, *J* = 289.7, 289.9 Hz), 143.0, 136.9, 129.9 (t, *J* = 3.0 Hz), 128.6, 128.1, 127.5, 126.7 (dd, *J* = 4.3, 4.4 Hz), 114.9, 112.7, 88.6 (dd, *J* = 21.1, 21.5 Hz), 76.6 (t, *J* = 3.0 Hz), 70.1, 40.5, 39.4, 25.5, 23.0, 14.0.

**<sup>19</sup>F NMR (56 MHz, Chloroform-*d*)**  $\delta$  -89.2 (d, *J* = 42.2 Hz), -91.2 (d, *J* = 42.3 Hz).

**HRMS (ESI-TOF)** *m/z*: [M + H]<sup>+</sup> Calcd for C<sub>23</sub>H<sub>26</sub>F<sub>2</sub>O<sub>2</sub> 373.1974; Found: 373.1970.

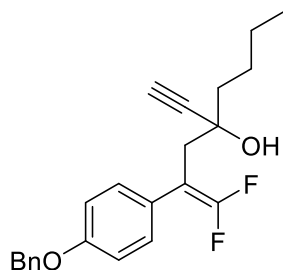

**2-(4-(benzyloxy)phenyl)-4-ethynyl-1,1-difluorooct-1-en-4-ol (4c)**

The title compound was prepared from **3aa** (69 mg, 0.20 mmol) general procedure 2. The crude residue was purified by flash chromatography (PE/EA = 20:1) to give the product as a colorless oil (47 mg, 64%).

**<sup>1</sup>H NMR (700 MHz, Chloroform-*d*)**  $\delta$  7.34 (d, *J* = 7.6 Hz, 2H), 7.30 (t, *J* = 7.5 Hz, 2H), 7.24 (t, *J* = 7.5 Hz, 1H), 7.20 (d, *J* = 8.3 Hz, 2H), 6.88 (d, *J* = 8.3 Hz, 2H), 4.97 (s, 2H), 2.81 – 2.59 (m, 2H), 2.26 (s, 1H), 1.73 (s, 1H), 1.51 (ddt, *J* = 11.6, 7.8, 4.5 Hz, 2H), 1.40 – 1.32 (m, 2H), 1.24 – 1.16 (m, 2H), 0.79 (t, *J* = 7.4 Hz, 3H).

**<sup>13</sup>C NMR (176 MHz, CDCl<sub>3</sub>)**  $\delta$  158.1, 154.9 (t, *J* = 289.2 Hz), 136.8, 130.0 (t, *J* = 2.5 Hz), 128.6, 128.1, 127.5, 126.4 (dd, *J* = 4.1, 4.4 Hz), 114.9, 88.4 (dd, *J* = 21.1, 20.9 Hz), 85.6, 73.2, 71.5 (t, *J* = 2.4 Hz), 70.0, 41.4, 40.3, 26.3, 22.7, 14.0.

**<sup>19</sup>F NMR (56 MHz, Chloroform-*d*)**  $\delta$  -88.5 (d, *J* = 39.0 Hz), -90.2 (d, *J* = 37.1 Hz).

**HRMS (ESI-TOF)** *m/z*: [M + H]<sup>+</sup> Calcd for C<sub>23</sub>H<sub>24</sub>F<sub>2</sub>O<sub>2</sub> 371.1817; Found: 371.1816.

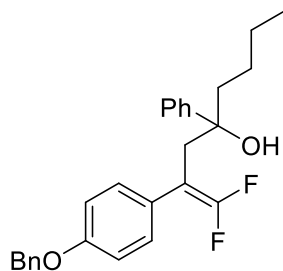

#### 2-(4-(benzyloxy)phenyl)-1,1-difluoro-4-phenyloct-1-en-4-ol (4d)

The title compound was prepared from **3aa** (69 mg, 0.20 mmol) general procedure 2. The crude residue was purified by flash chromatography (PE/EA = 50:1) to give the product as a colorless oil (66 mg, 78%).

**<sup>1</sup>H NMR (700 MHz, Chloroform-*d*)**  $\delta$  7.50 – 7.41 (m, 5H), 7.32 (s, 5H), 7.10 (d,  $J$  = 10.0 Hz, 2H), 6.94 (d,  $J$  = 9.2 Hz, 2H), 5.08 (s, 4H), 2.95 (t,  $J$  = 2.5 Hz, 3H), 1.60 (s, 1H), 0.83 – 0.81 (m, 3H).

**<sup>13</sup>C NMR (176 MHz, CDCl<sub>3</sub>)**  $\delta$  158.0, 154.4 (t,  $J$  = 288.6 Hz), 145.4, 136.9, 129.8 (t,  $J$  = 2.6 Hz), 128.6, 128.1, 127.9, 127.5, 126.5, 126.4 (t,  $J$  = 5.2 Hz), 125.3, 115.0, 88.7 (dd,  $J$  = 21.3, 21.1 Hz), 77.9 (t,  $J$  = 2.7 Hz), 70.0, 42.1, 41.5, 25.4, 23.0, 14.0.

**<sup>19</sup>F NMR (56 MHz, Chloroform-*d*)**  $\delta$  -89.7 (d,  $J$  = 44.4 Hz), -91.2 (d,  $J$  = 37.9 Hz).

**HRMS (ESI-TOF)**  $m/z$ : [M + H]<sup>+</sup> Calcd for C<sub>27</sub>H<sub>28</sub>F<sub>2</sub>O<sub>2</sub> 423.2130; Found: 423.2128.

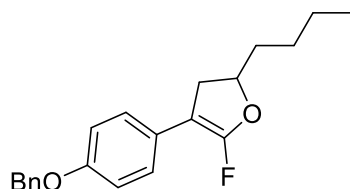

#### 4-(4-(benzyloxy)phenyl)-2-butyl-5-fluoro-2,3-dihydrofuran (4e)

The title compound was prepared from **4a** (69 mg, 0.20 mmol) general procedure 4. The crude residue was purified by flash chromatography (PE/EA = 50:1) to give the product as a colorless oil (40 mg, 62%).

**<sup>1</sup>H NMR (700 MHz, Chloroform-*d*)**  $\delta$  7.35 (d,  $J$  = 7.6 Hz, 2H), 7.30 (t,  $J$  = 7.5 Hz, 2H), 7.24 (t,  $J$  = 7.3 Hz, 1H), 7.13 – 7.06 (m, 2H), 6.88 – 6.83 (m, 2H), 4.97 (s, 2H), 4.61 (dq,  $J$  = 9.0, 6.6 Hz, 1H), 2.99 (ddd,  $J$  = 13.2, 9.7, 3.7 Hz, 1H), 2.58 (ddd,  $J$  = 12.5, 7.3, 4.1 Hz, 1H), 1.76 (qd,  $J$  = 11.1, 9.1, 5.8 Hz, 1H), 1.59 (ddt,  $J$  = 14.2, 11.1, 5.0 Hz, 1H), 1.39 – 1.28 (m, 4H), 0.86 (t,  $J$  = 6.8 Hz, 3H).

**<sup>13</sup>C NMR (176 MHz, CDCl<sub>3</sub>)**  $\delta$  156.2 (d,  $J$  = 2.2 Hz), 155.4 (d,  $J$  = 277.8 Hz), 137.1, 128.6, 127.9, 127.5, 125.9 (d,  $J$  = 6.2 Hz), 125.7 (d,  $J$  = 5.6 Hz), 115.0, 80.3 (d,  $J$  = 11.3 Hz), 79.6 (d,  $J$  = 2.3 Hz), 70.1, 35.9, 35.2 (d,  $J$  = 3.0 Hz), 27.0, 22.5, 14.0.

**<sup>19</sup>F NMR (56 MHz, Chloroform-*d*)**  $\delta$  -150.2.

**HRMS (ESI-TOF)**  $m/z$ : [M + H]<sup>+</sup> Calcd for C<sub>21</sub>H<sub>23</sub>FO<sub>2</sub> 327.1755; Found: 327.1752.

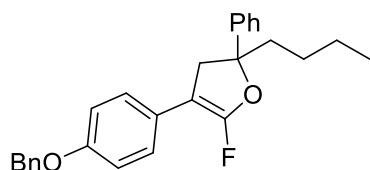

#### 4-(4-(benzyloxy)phenyl)-2-butyl-5-fluoro-2-phenyl-2,3-dihydrofuran (4f)

The title compound was prepared from **4d** (85 mg, 0.20 mmol) general procedure 4. The crude residue

was purified by flash chromatography (PE/EA = 50:1) to give the product as a colorless oil (54 mg, 67%).

**<sup>1</sup>H NMR (700 MHz, Chloroform-*d*)**  $\delta$  7.34 – 7.30 (m, 4H), 7.28 (td,  $J$  = 7.7, 2.1 Hz, 4H), 7.24 – 7.16 (m, 2H), 7.09 (d,  $J$  = 8.8 Hz, 2H), 6.83 (d,  $J$  = 8.8 Hz, 2H), 4.95 (s, 2H), 3.17 – 3.05 (m, 2H), 1.99 (ddd,  $J$  = 13.9, 11.7, 4.4 Hz, 1H), 1.88 (dddd,  $J$  = 13.9, 11.9, 4.5, 1.7 Hz, 1H), 1.33 – 1.26 (m, 1H), 1.23 – 1.15 (m, 2H), 1.11 – 1.01 (m, 1H), 0.76 (t,  $J$  = 7.4 Hz, 3H).

**<sup>13</sup>C NMR (176 MHz, CDCl<sub>3</sub>)**  $\delta$  155.2 (d,  $J$  = 1.8 Hz), 153.1 (d,  $J$  = 278.4 Hz), 144.1, 136.0, 127.5, 127.4, 126.9, 126.4, 126.1, 124.7 (d,  $J$  = 5.5 Hz), 124.5 (d,  $J$  = 6.4 Hz), 123.4, 114.0, 86.8, 79.2 (d,  $J$  = 10.9 Hz), 69.0, 42.4 (d,  $J$  = 2.7 Hz), 41.6, 24.6, 21.7, 12.9.

**<sup>19</sup>F NMR (56 MHz, Chloroform-*d*)**  $\delta$  -149.2.

**HRMS (ESI-TOF)**  $m/z$ : [M + H]<sup>+</sup> Calcd for C<sub>27</sub>H<sub>27</sub>FO<sub>2</sub> 403.2068; Found: 403.2066.

## 6. Copies of NMR spectra for compounds

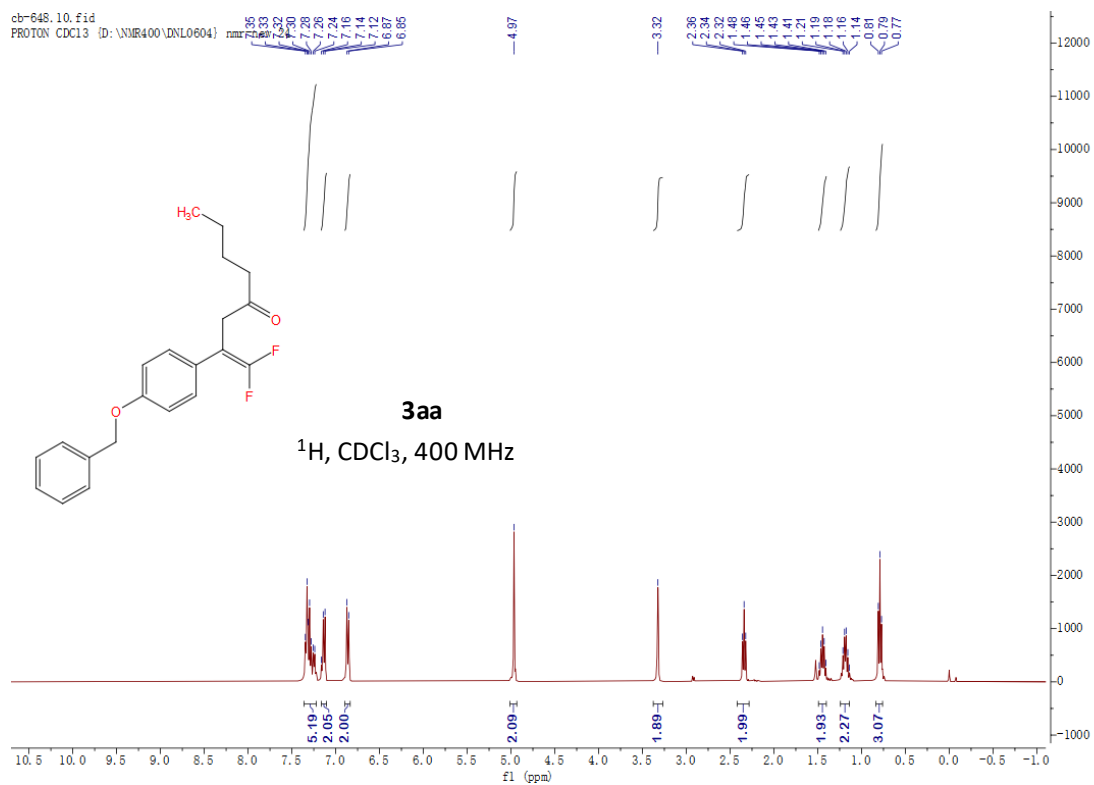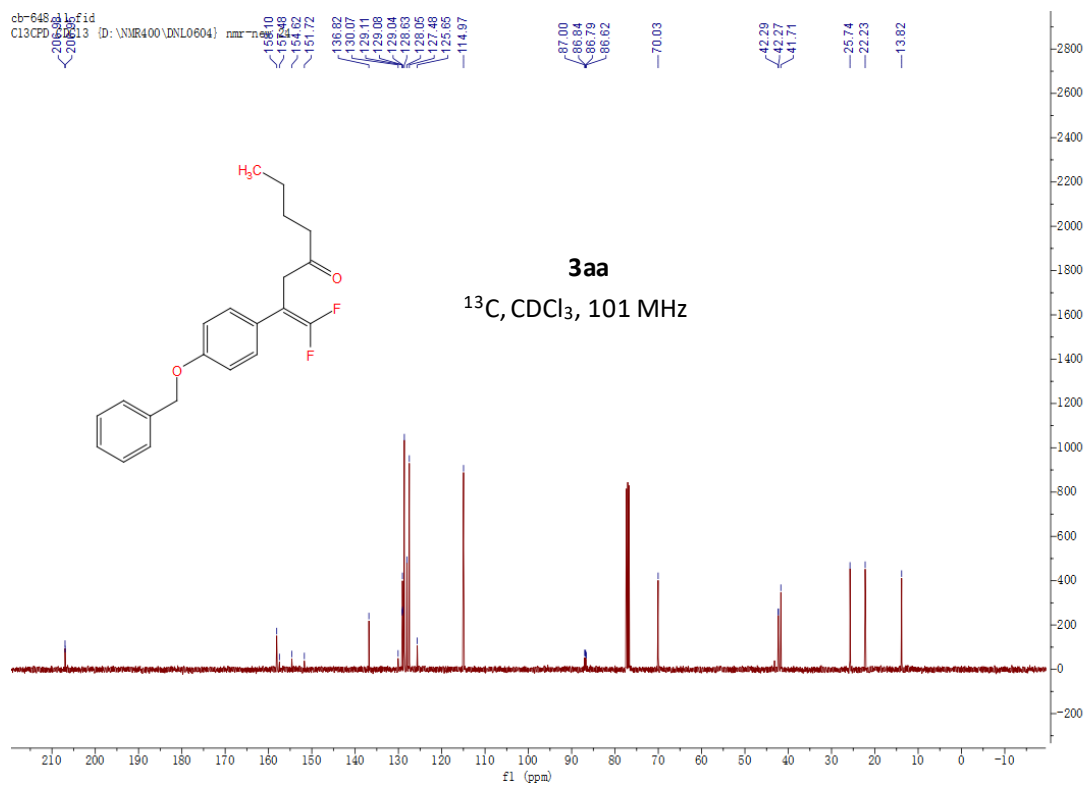



cb-648.12.fid  
F19 CDCl3 [D:\NMR400\DNL0604] nmr-new 24

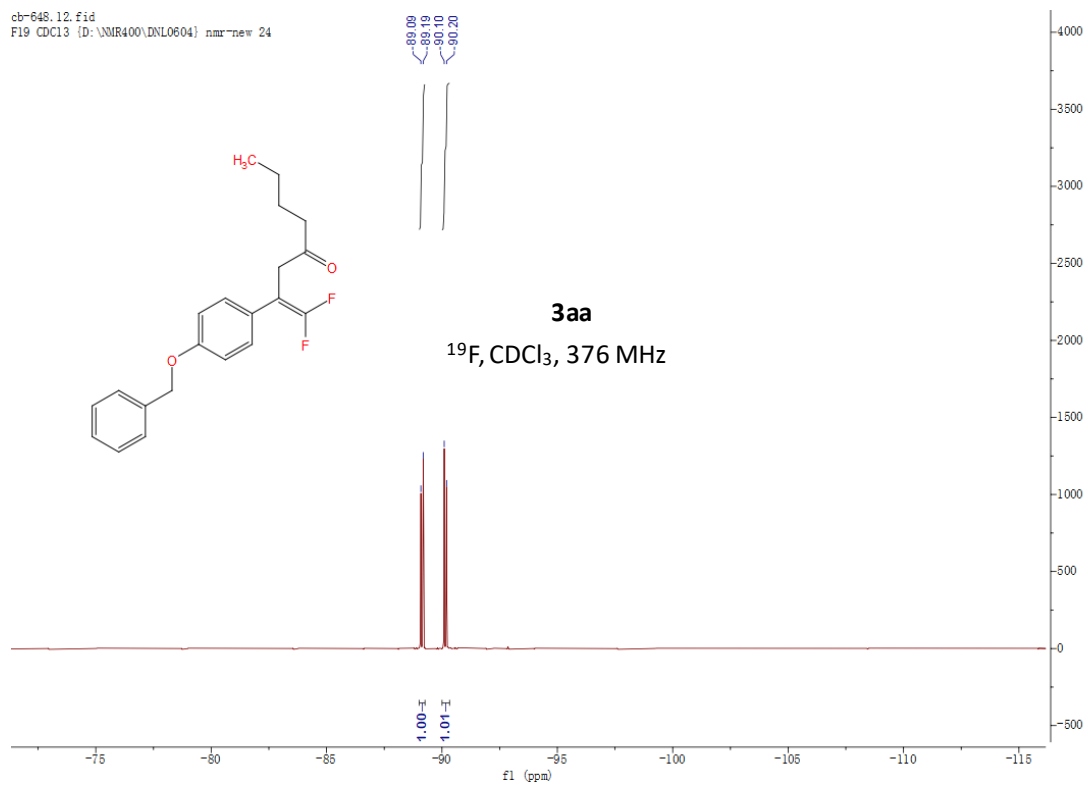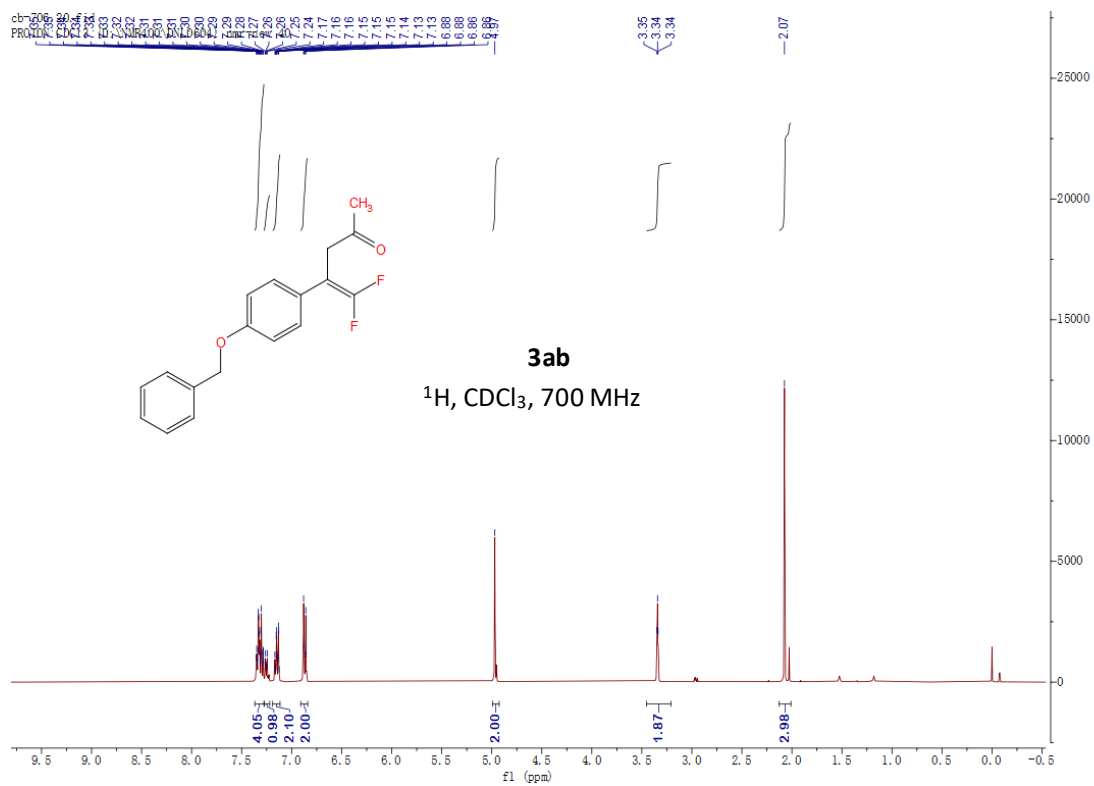

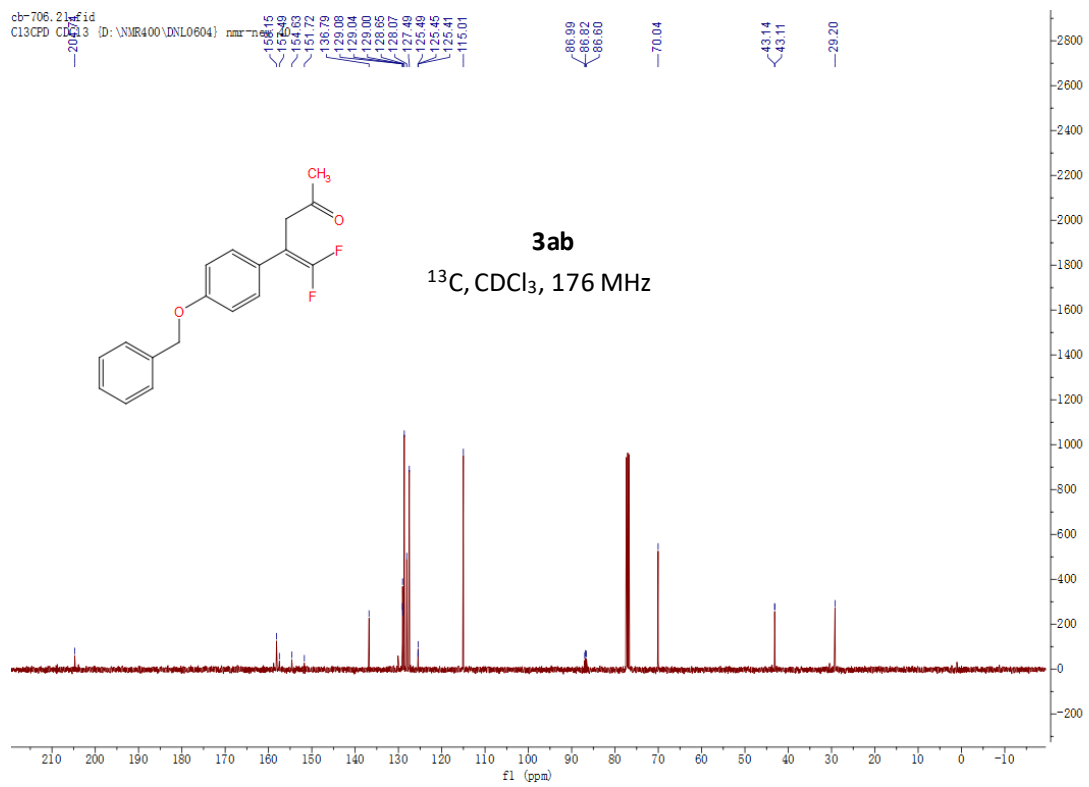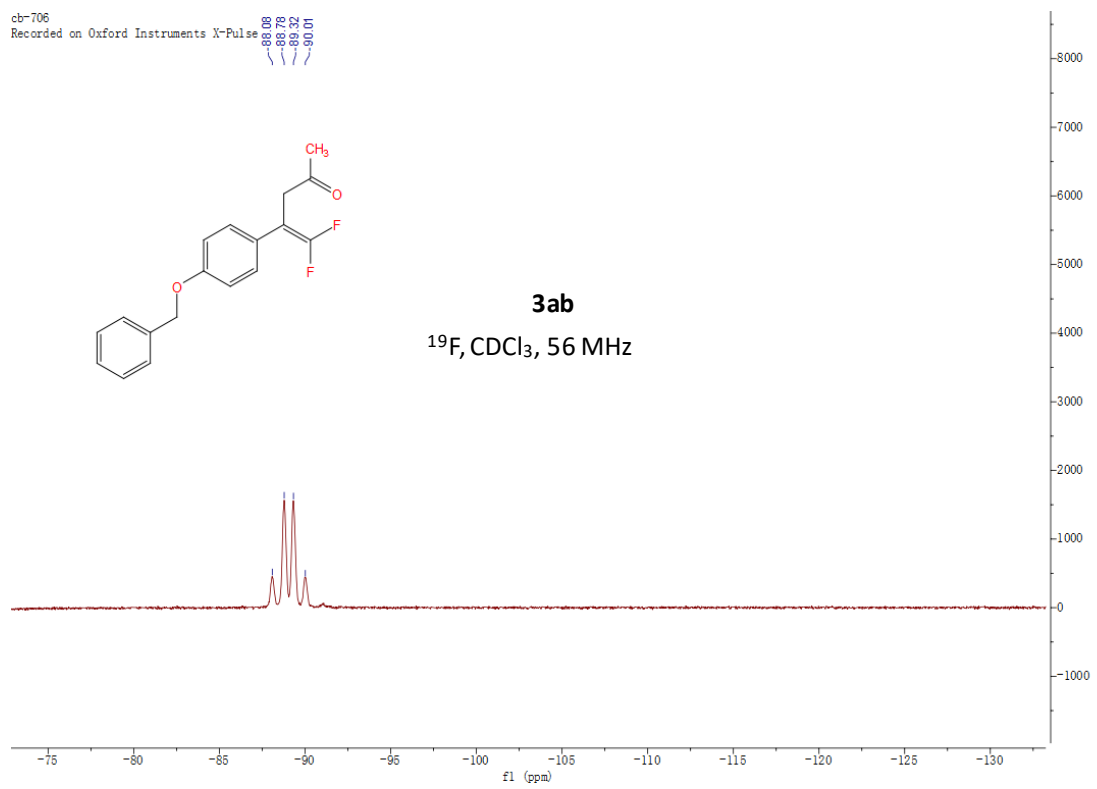

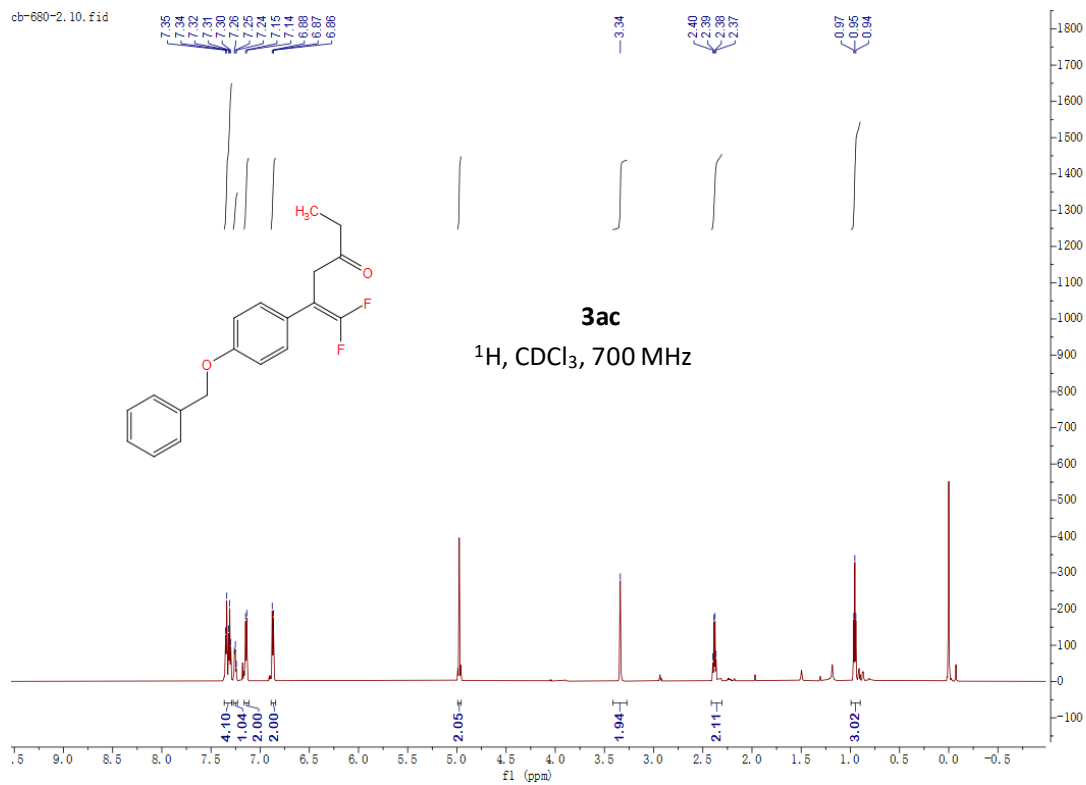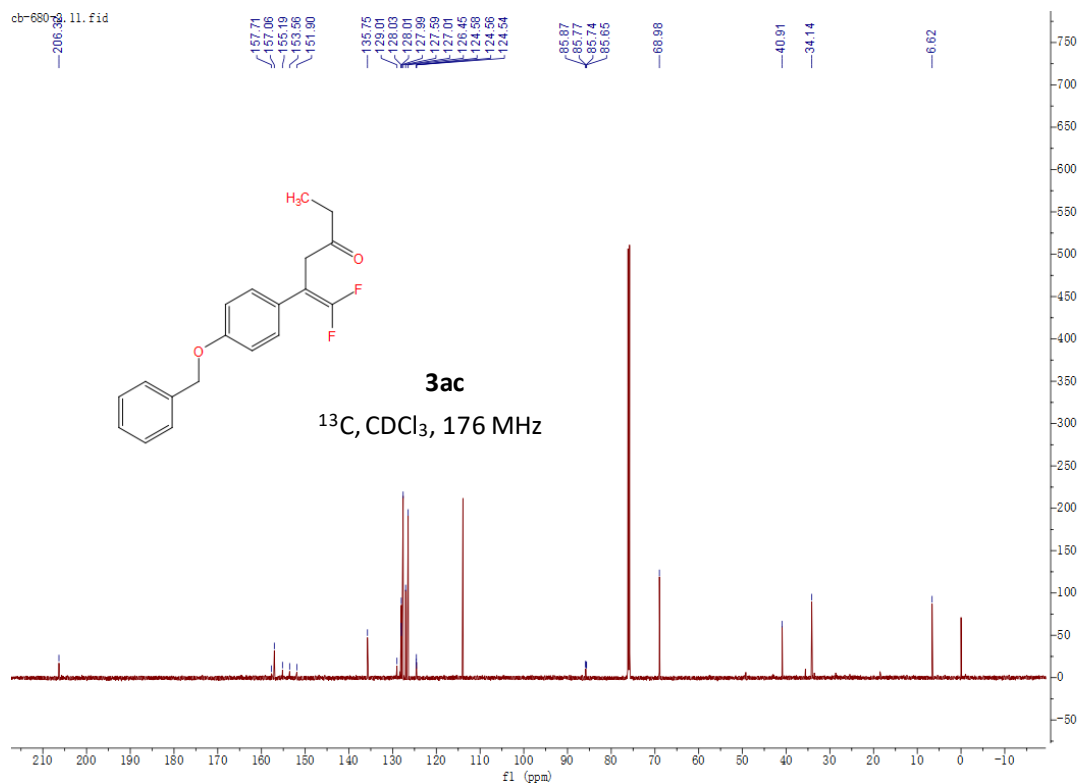

cb-680  
Recorded on Oxford Instruments X-Pulse

88.32  
89.02  
89.49  
90.18

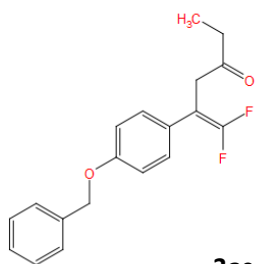

$^{19}\text{F}$ ,  $\text{CDCl}_3$ , 56 MHz

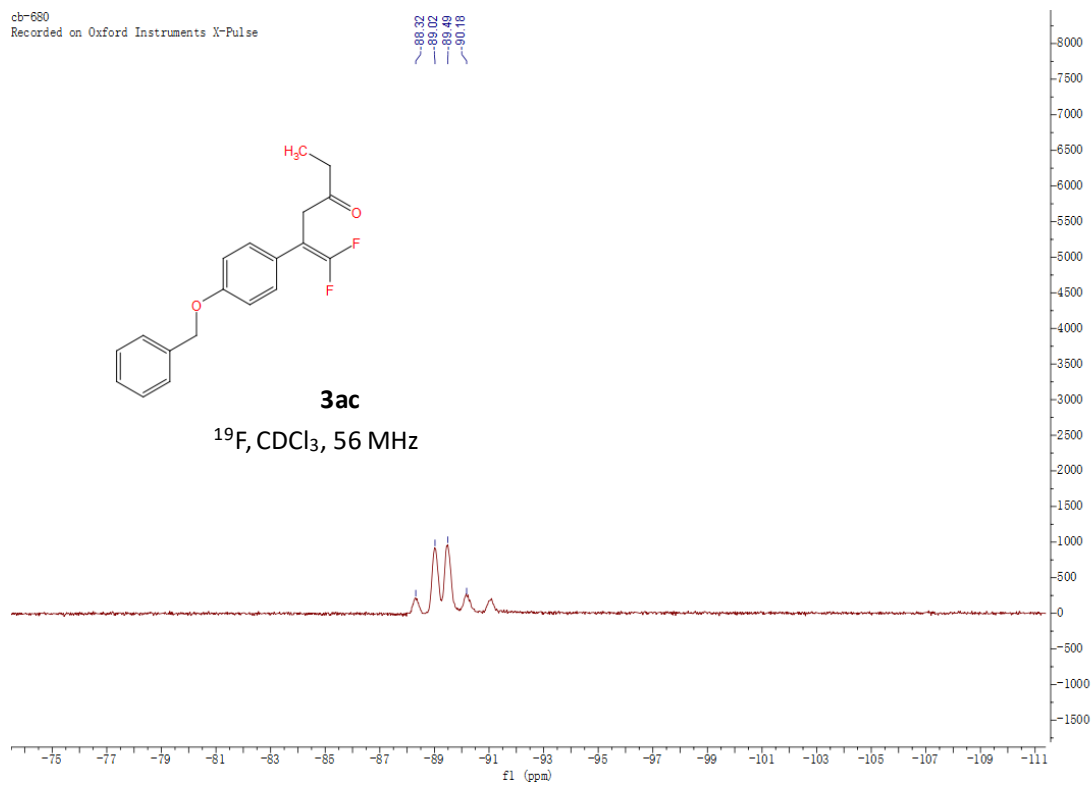

cb-678.70.fid

7.34  
7.34  
7.33  
7.32  
7.31  
7.30  
7.29  
7.28  
7.25  
7.24  
7.23  
7.14  
7.13  
6.87  
6.86

4.96

3.32

2.95  
2.93  
2.92  
2.91  
1.46  
1.45  
1.44  
1.20  
1.19  
1.18  
1.17  
1.16  
1.15  
1.14  
1.14  
1.079  
0.77

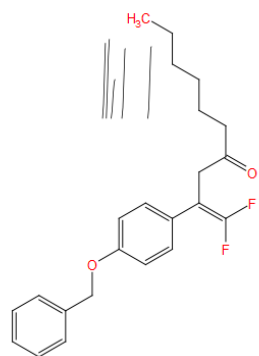

$^1\text{H}$ ,  $\text{CDCl}_3$ , 700 MHz

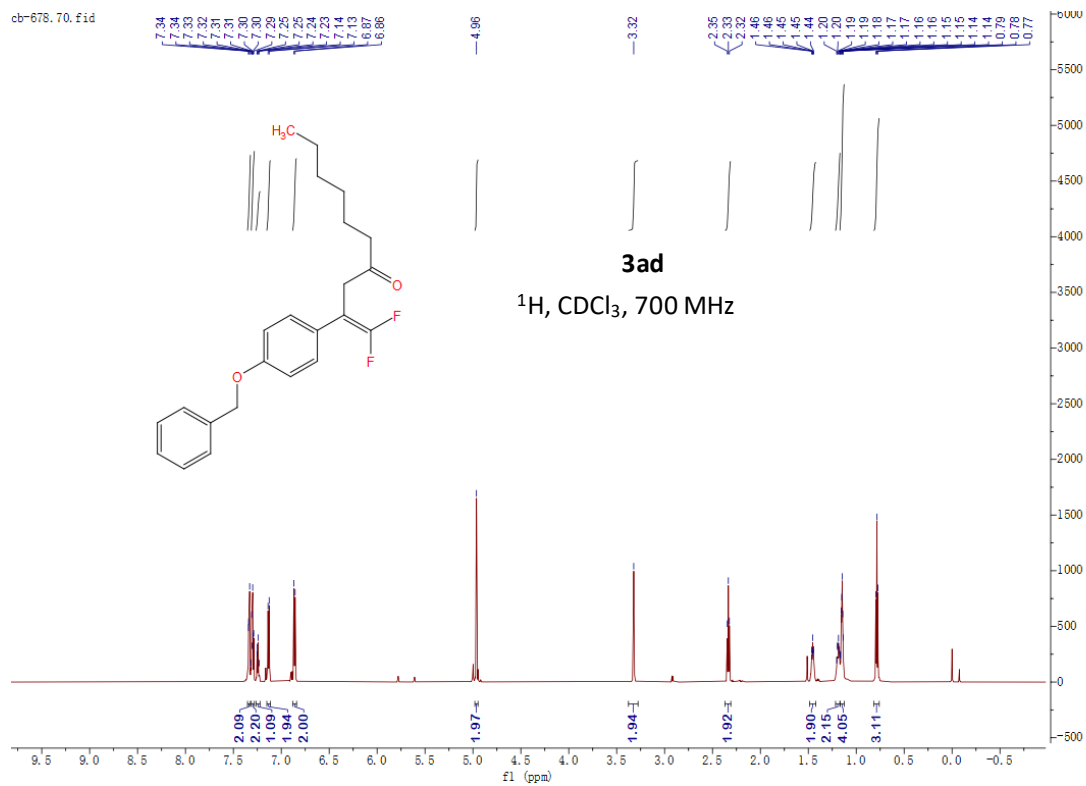

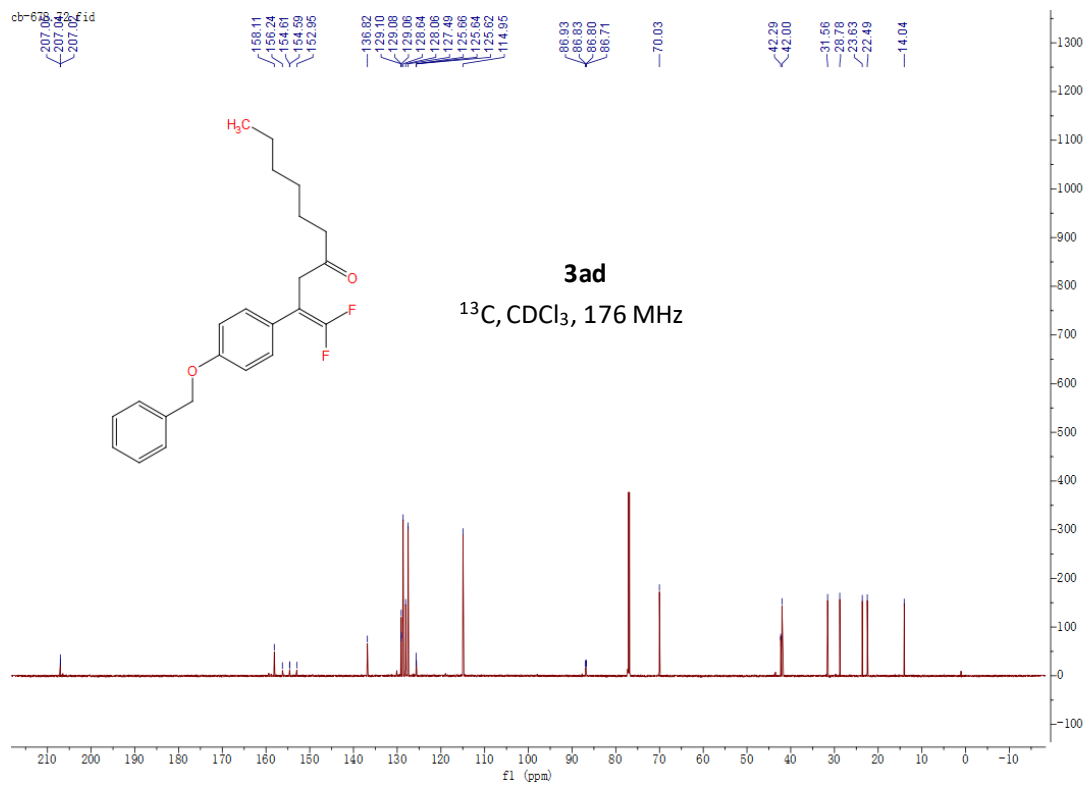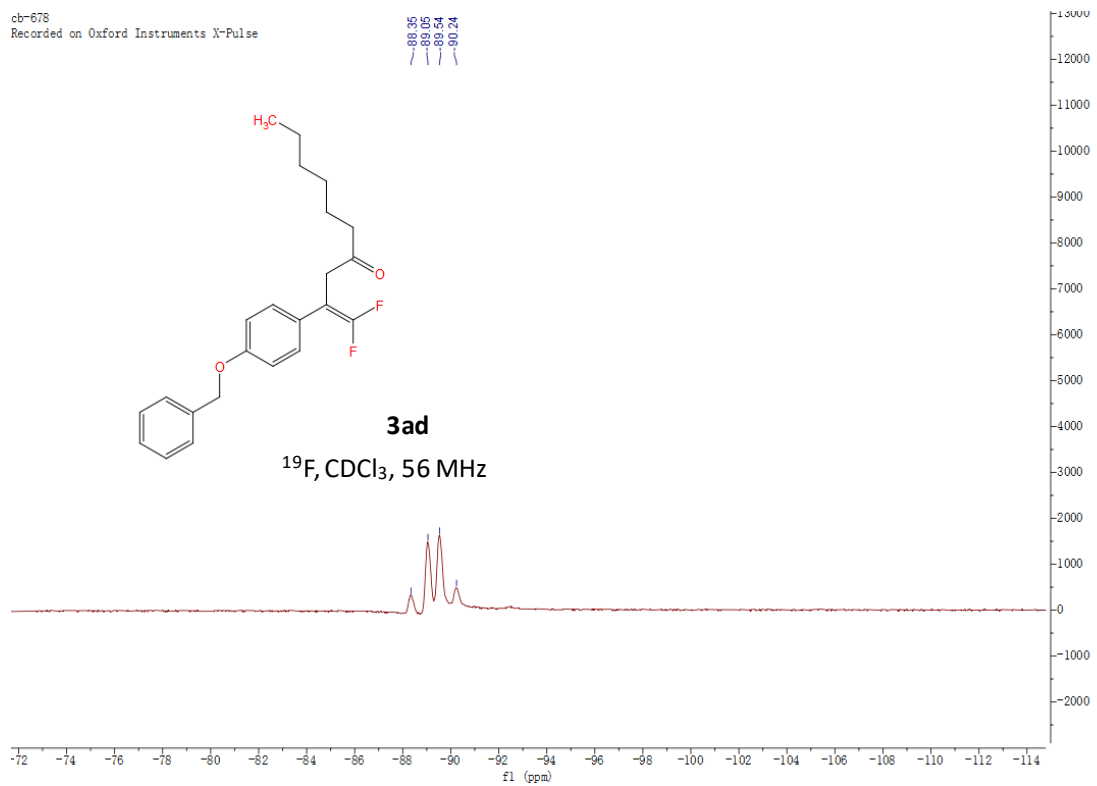

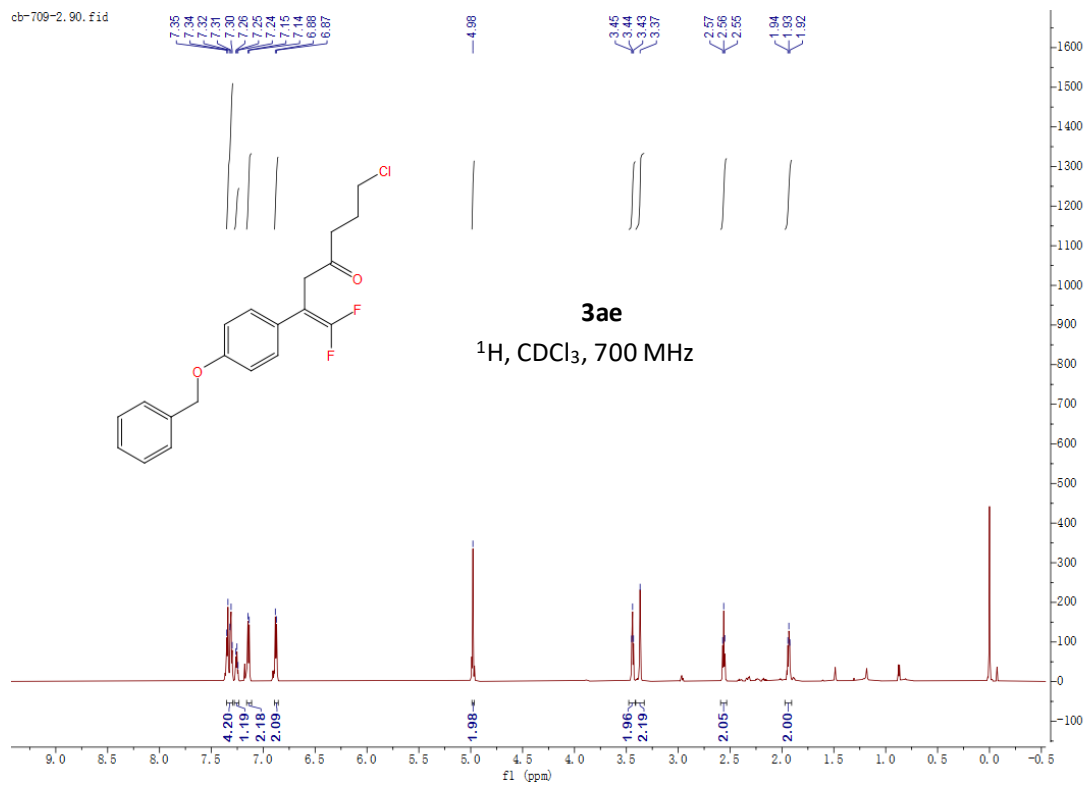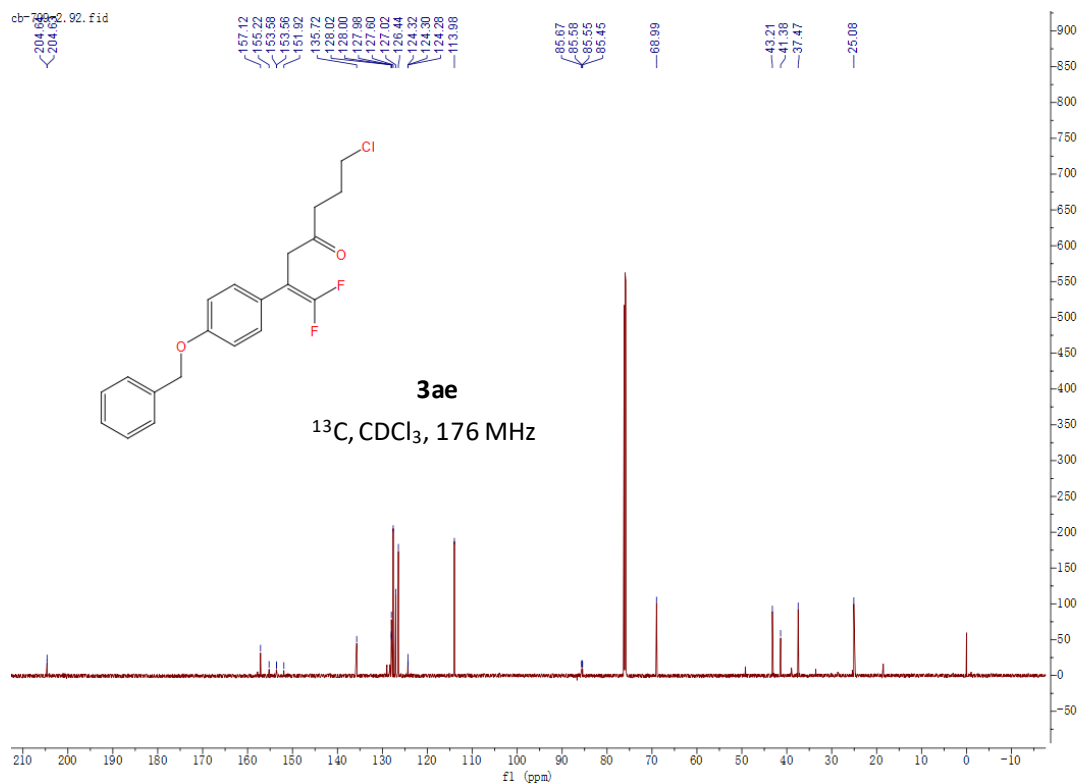

cb-709  
Recorded on Oxford Instruments X-Pulse

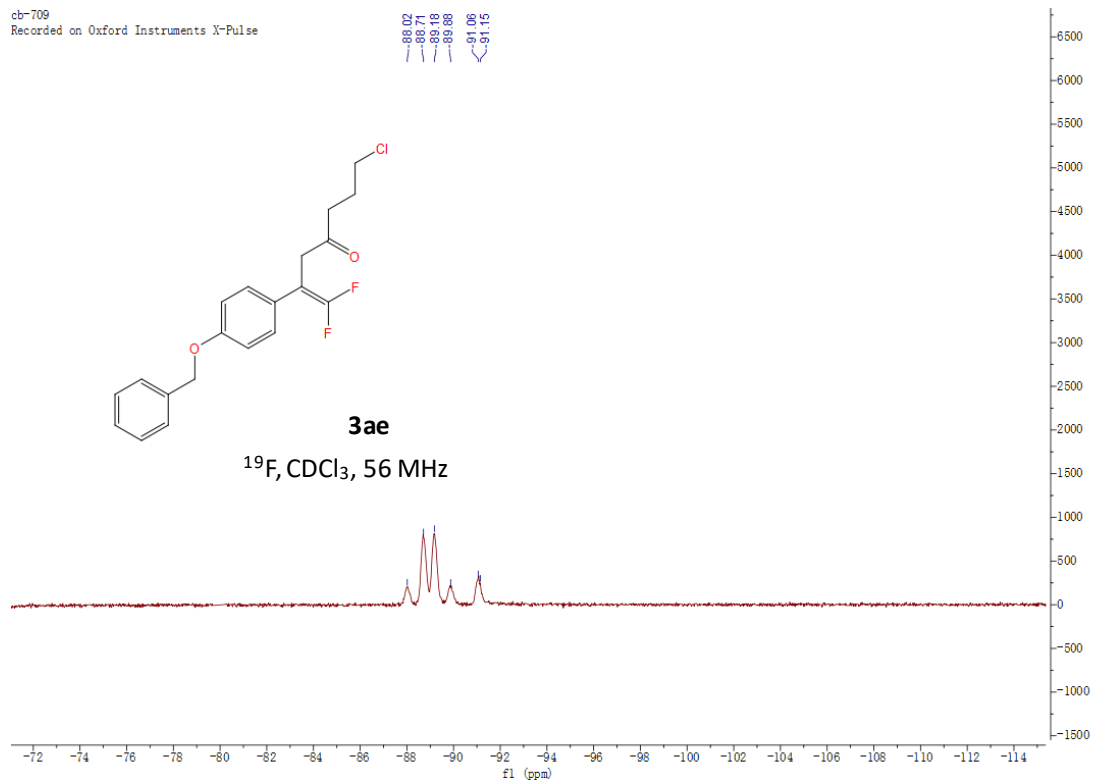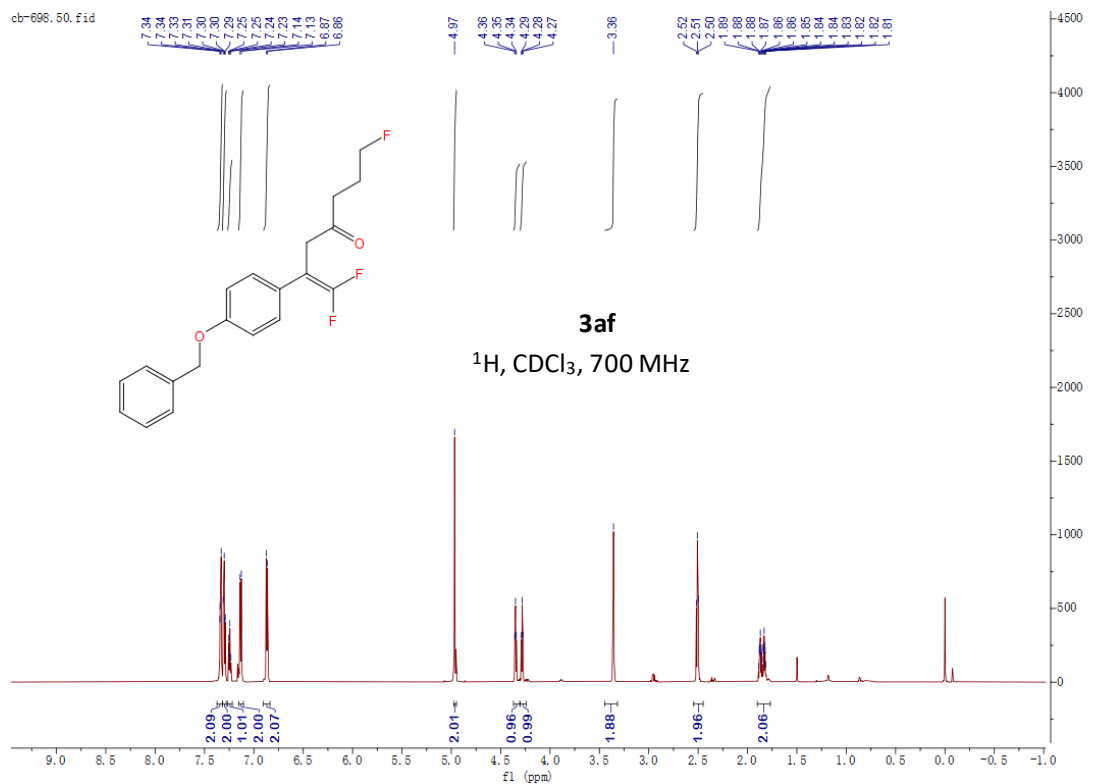





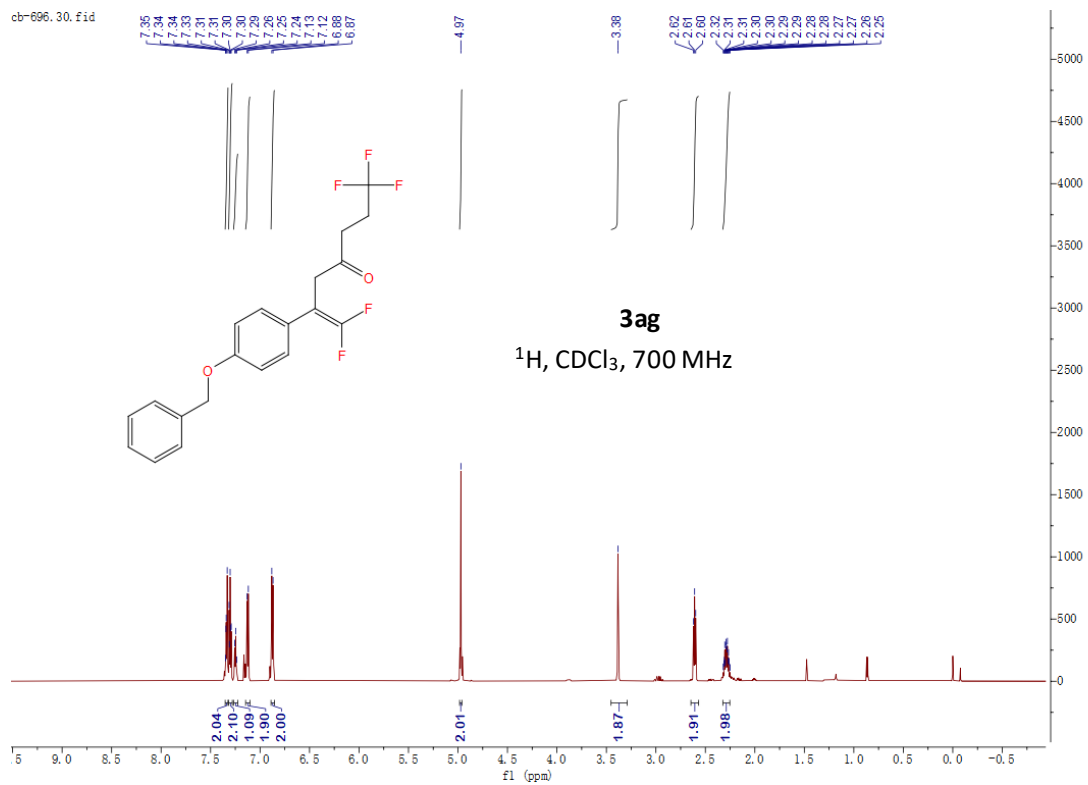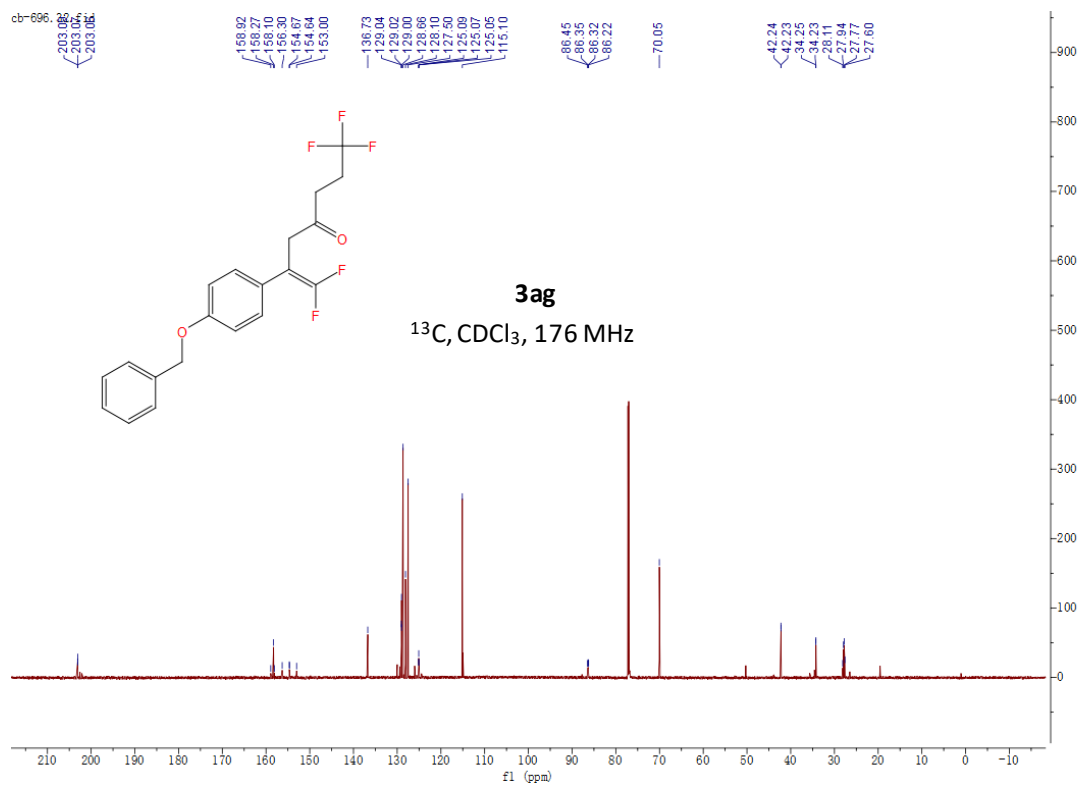

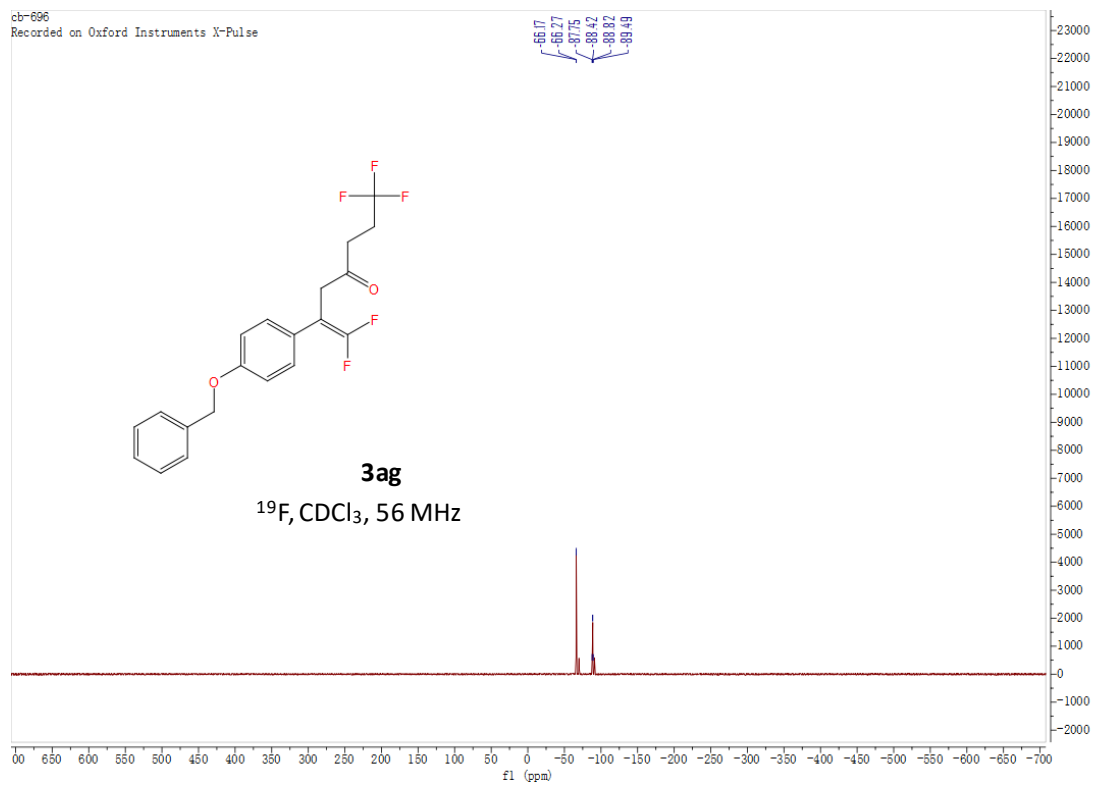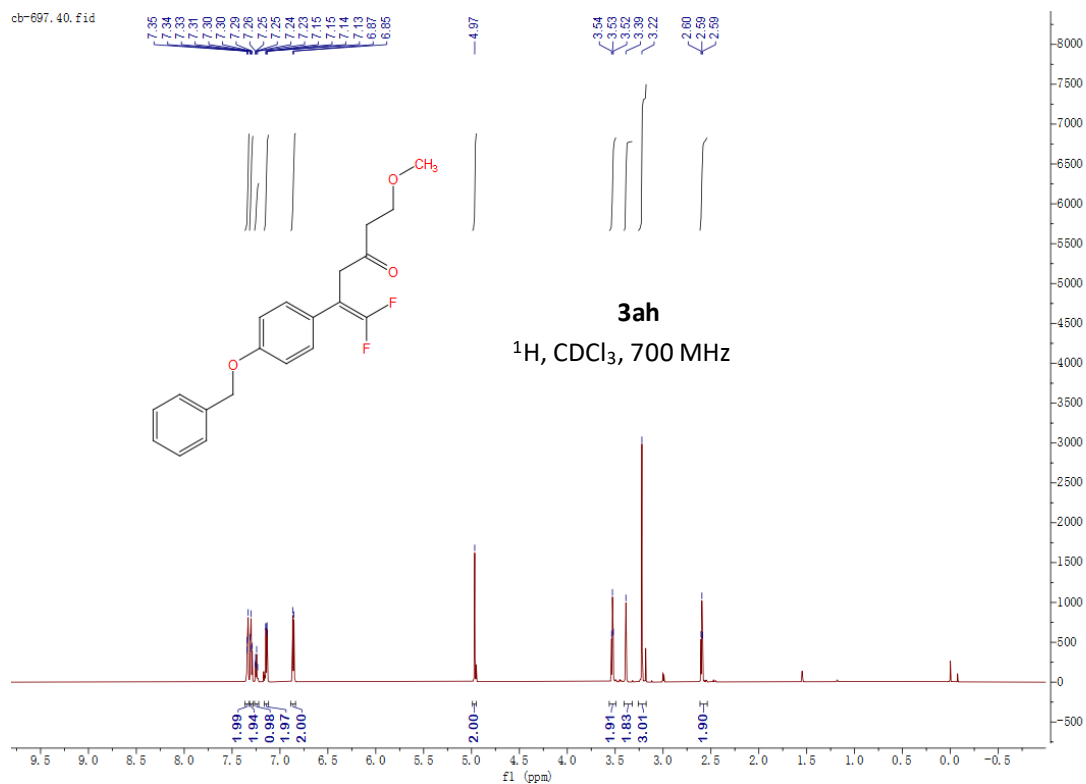

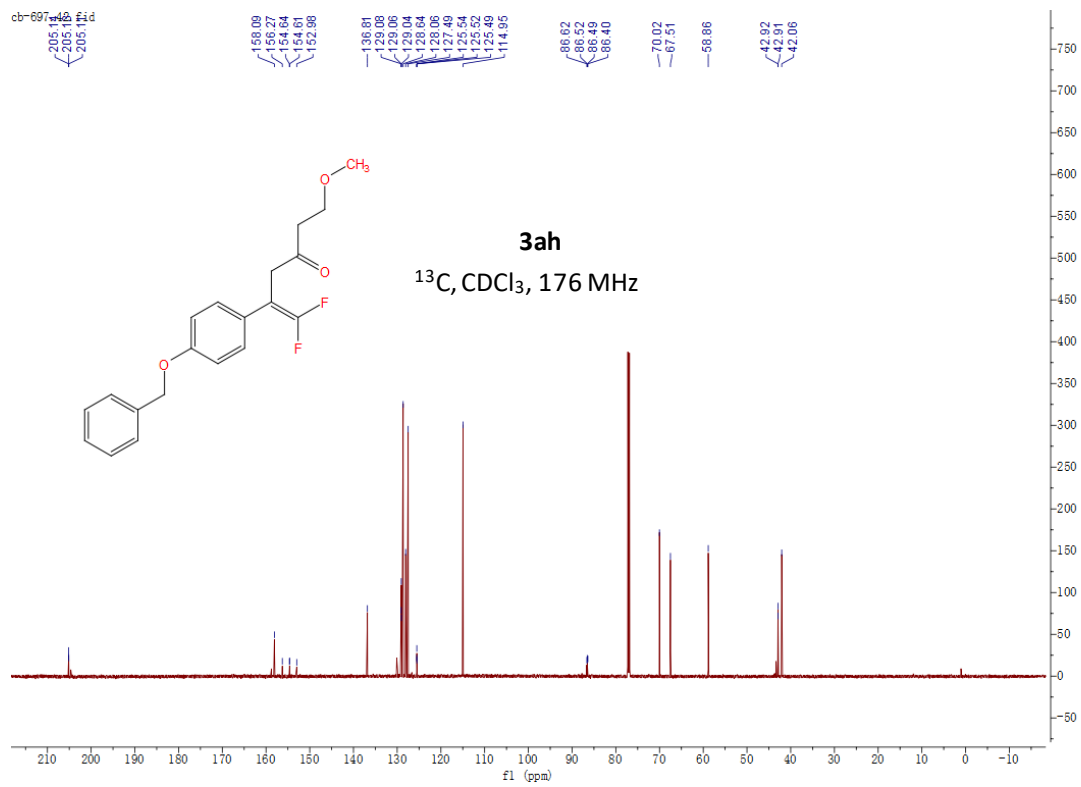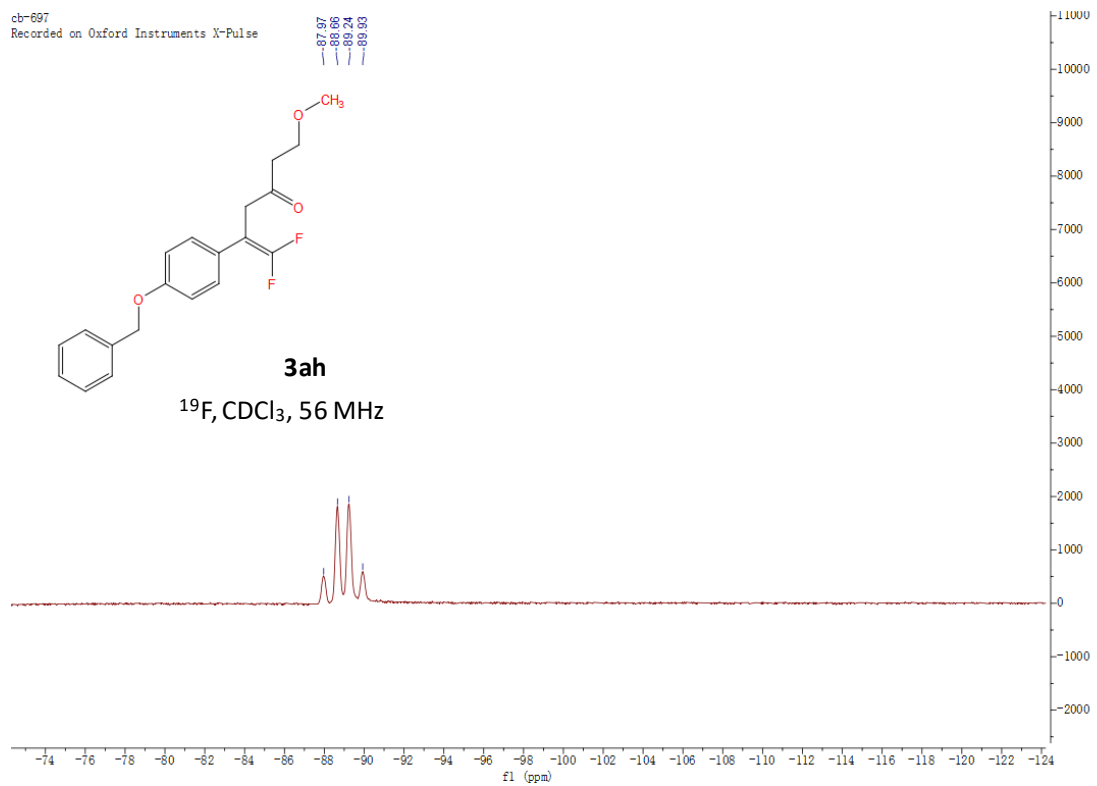

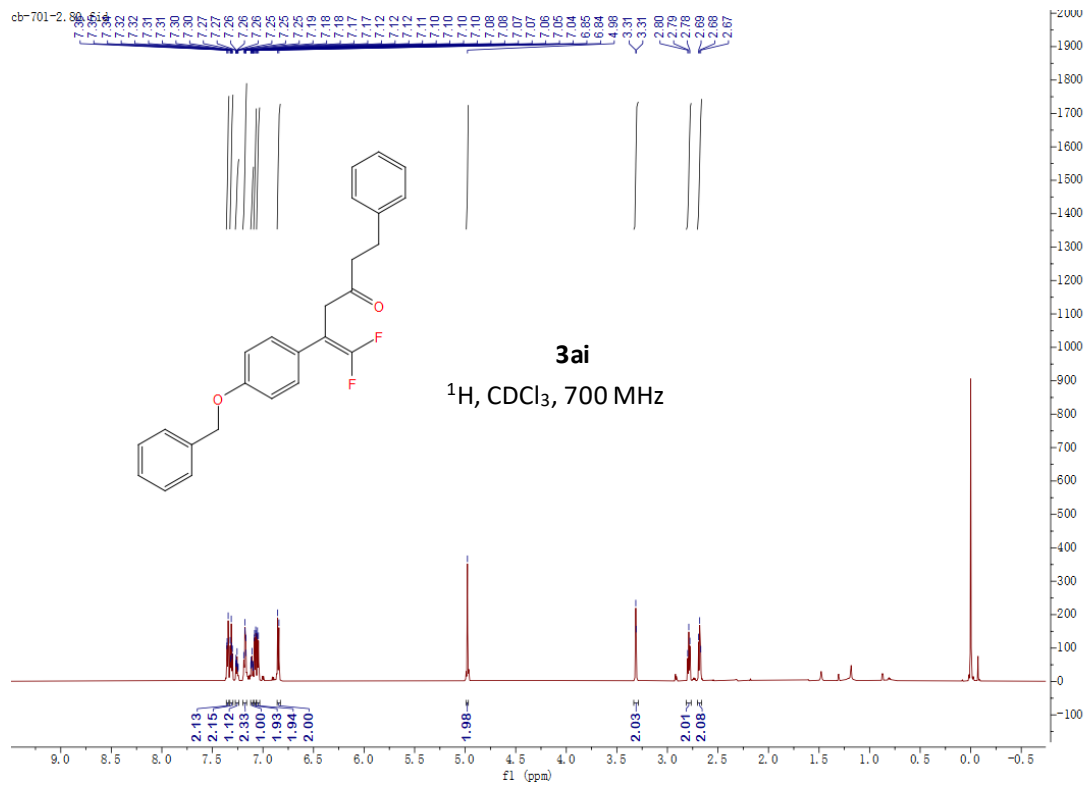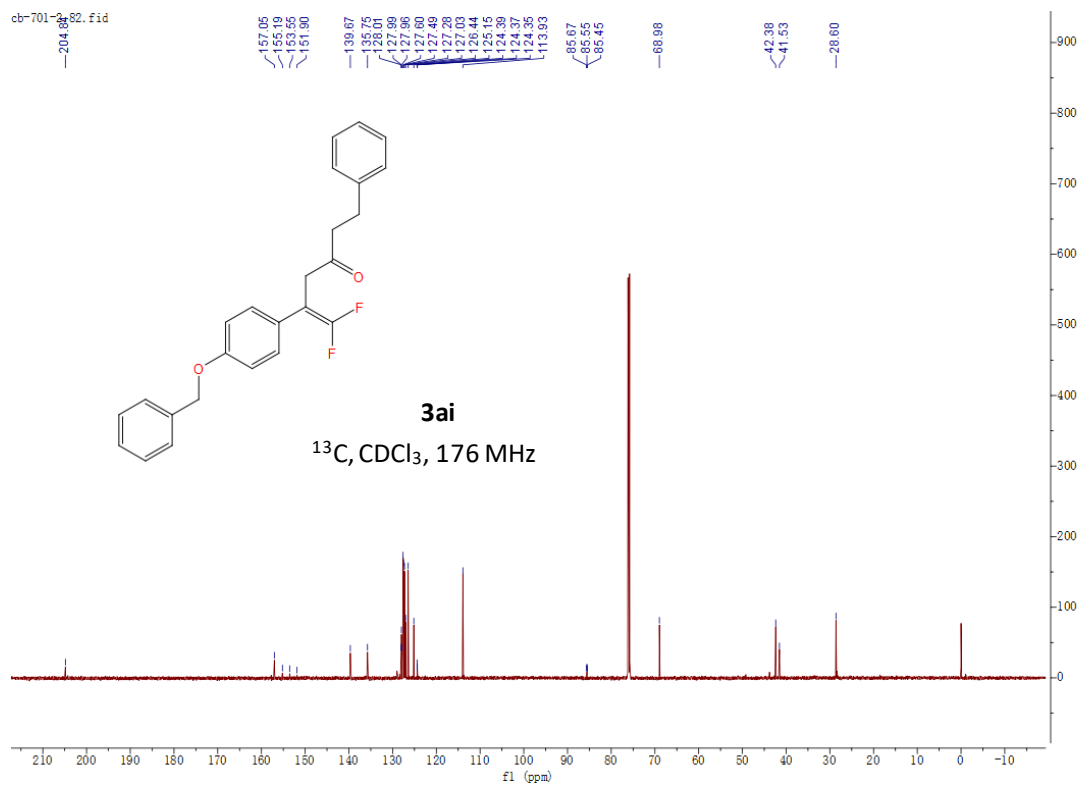

cb-701-2  
Recorded on Oxford Instruments X-Pulse

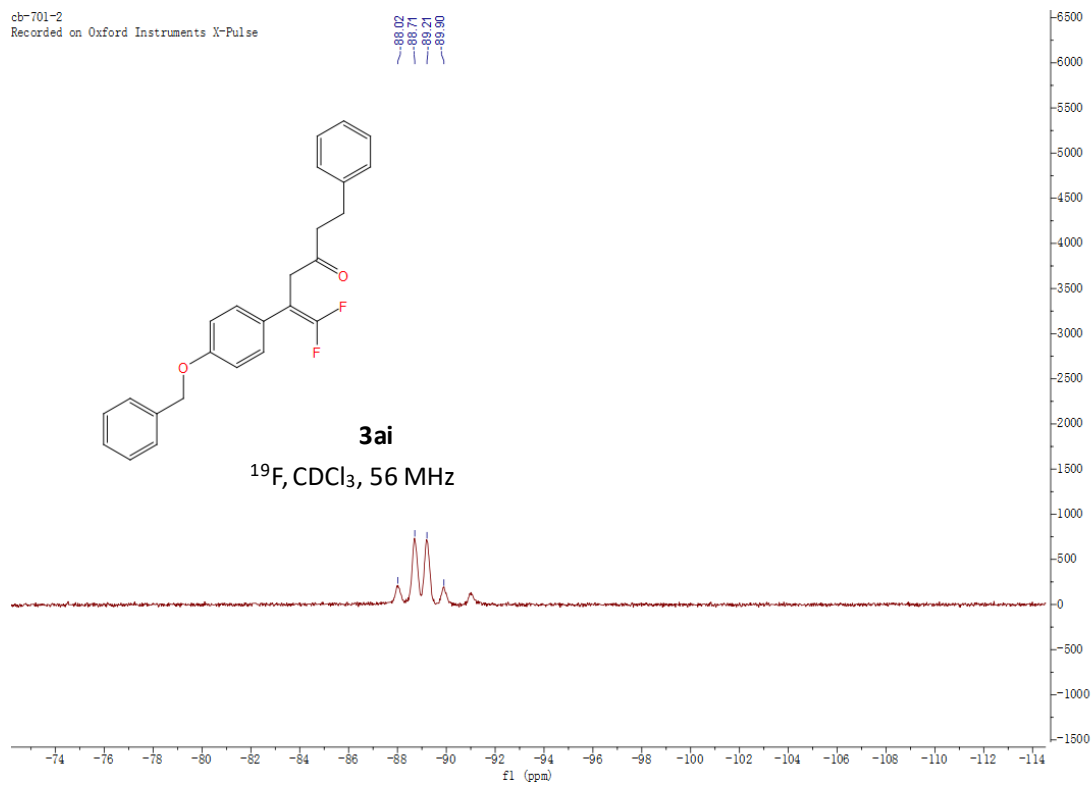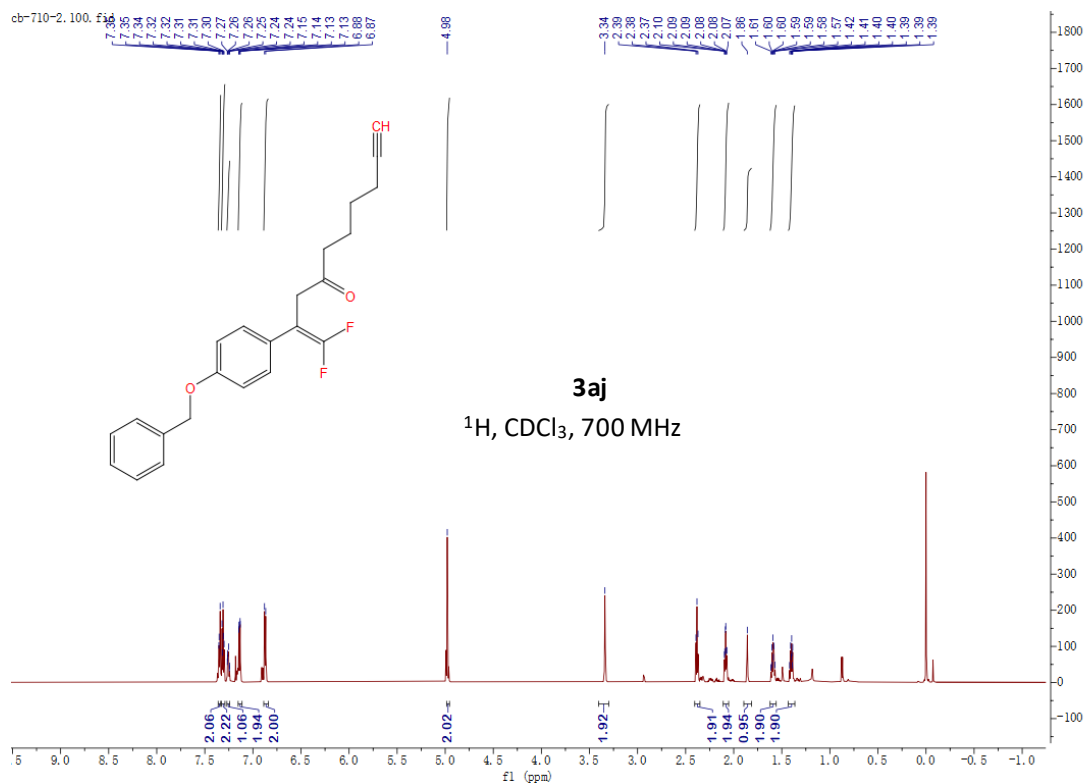

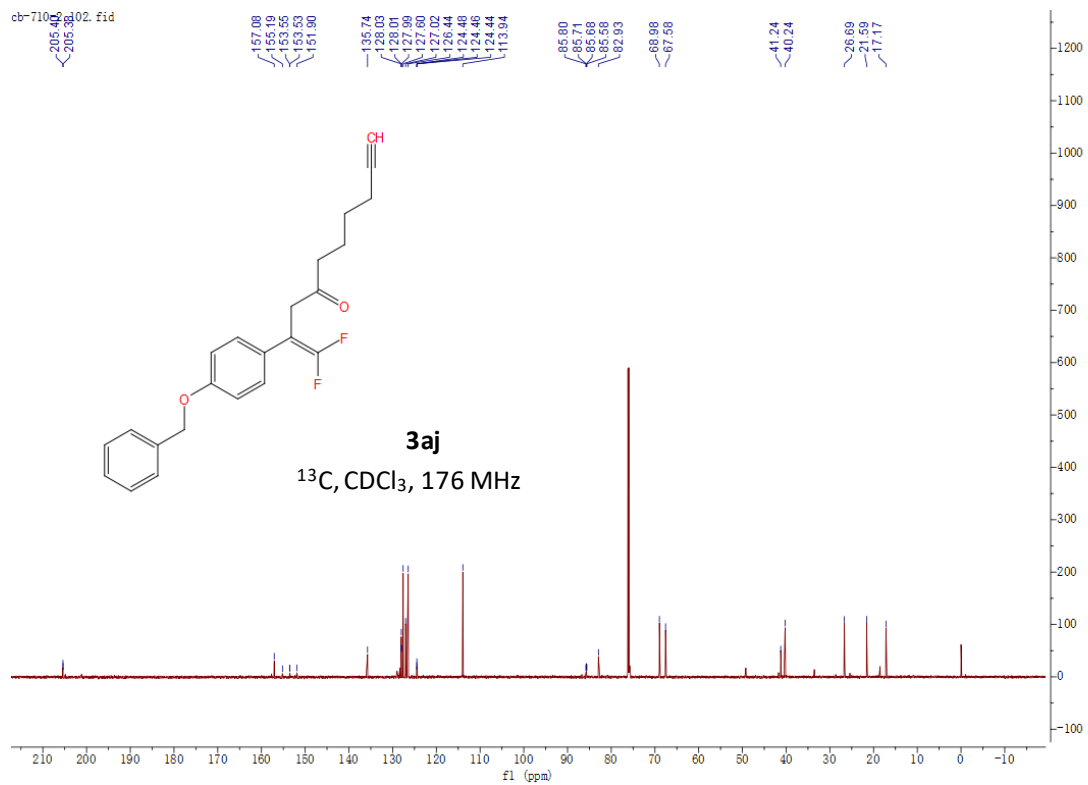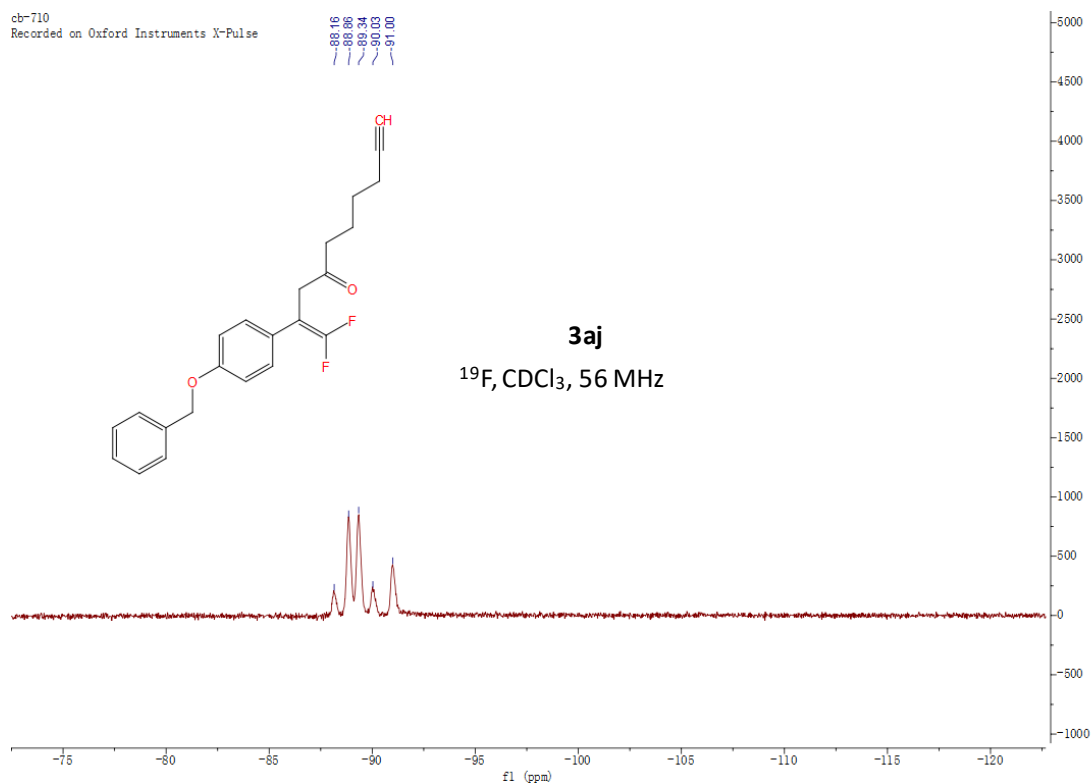

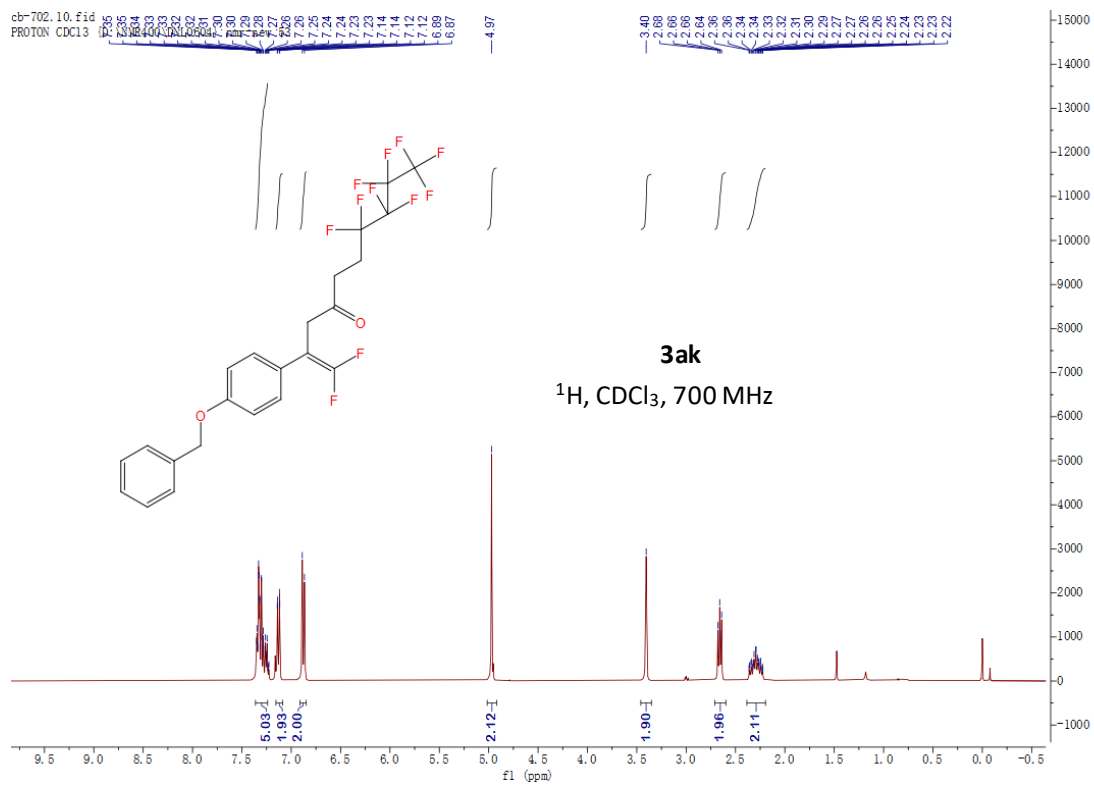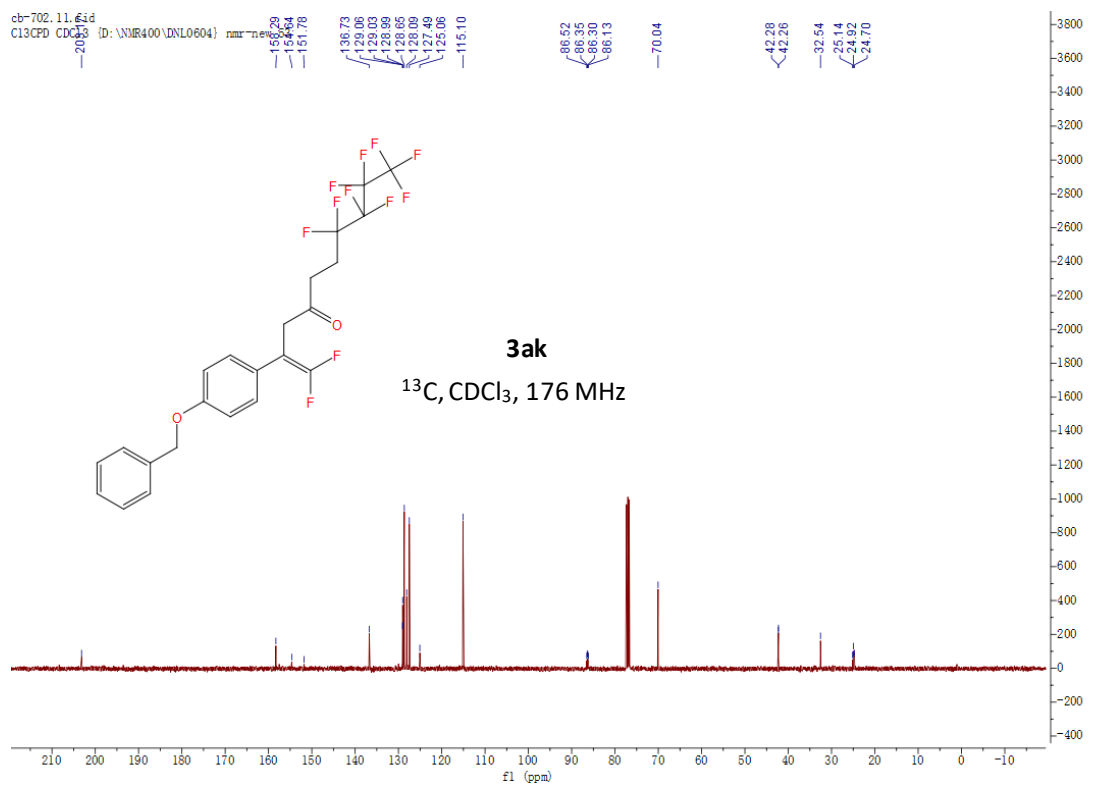





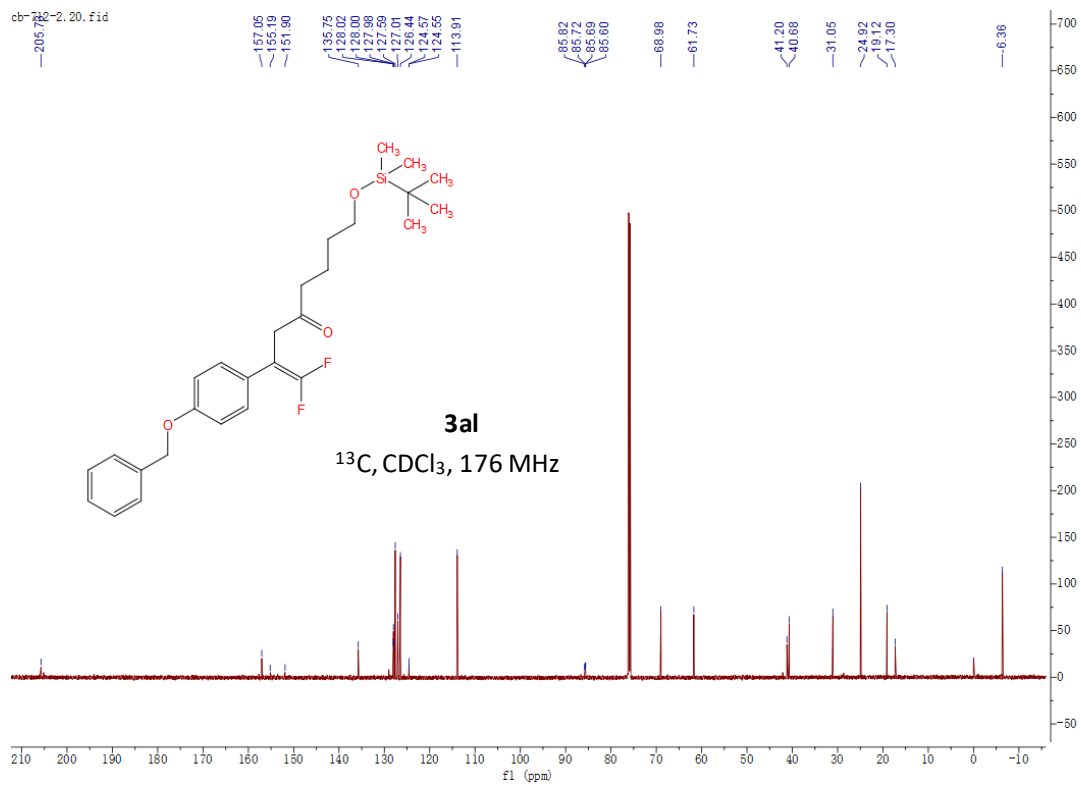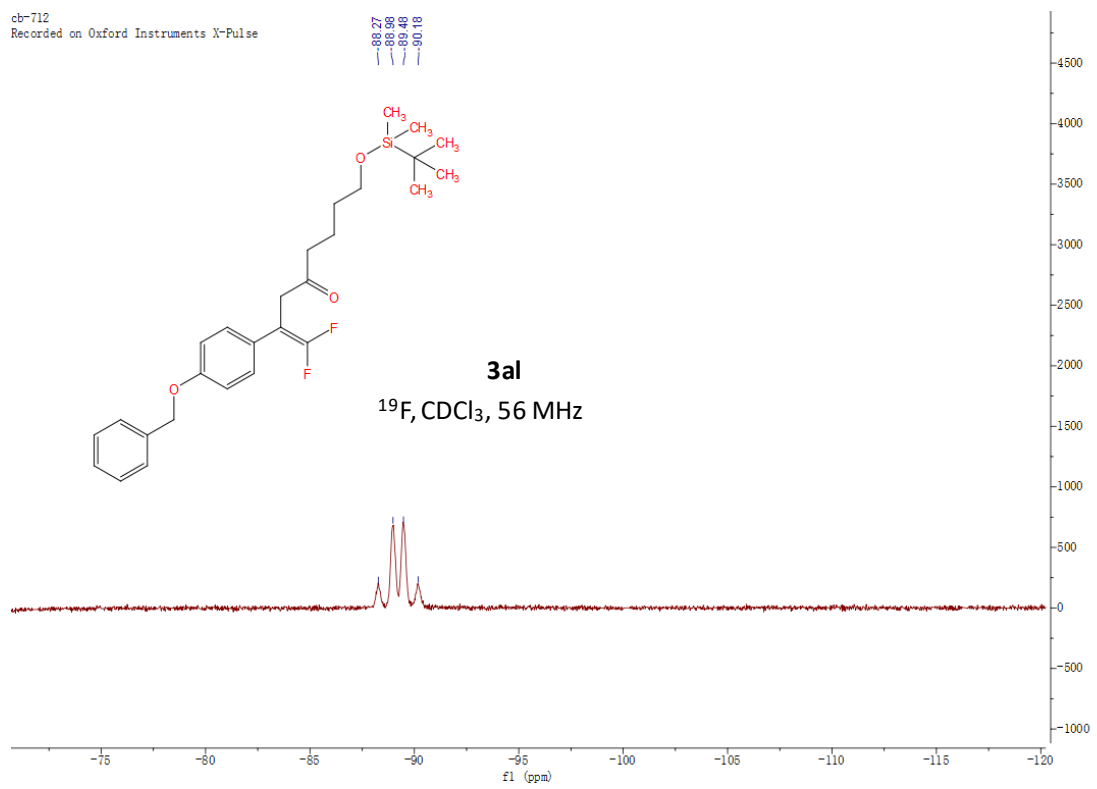

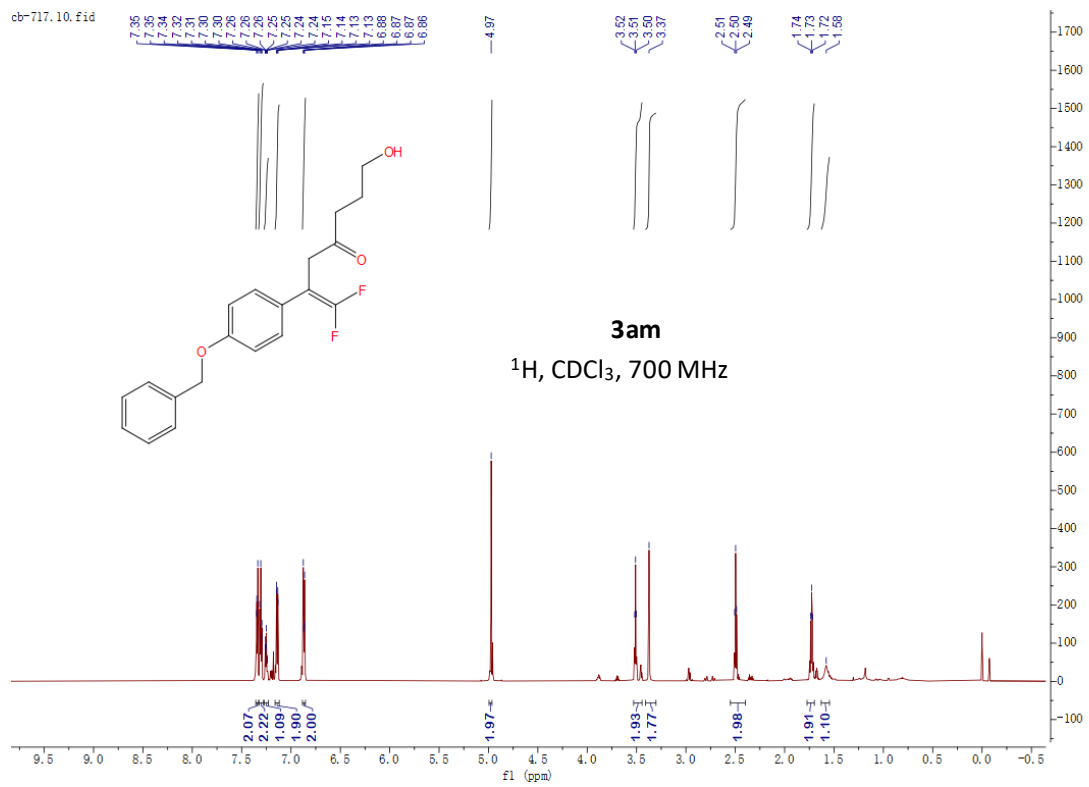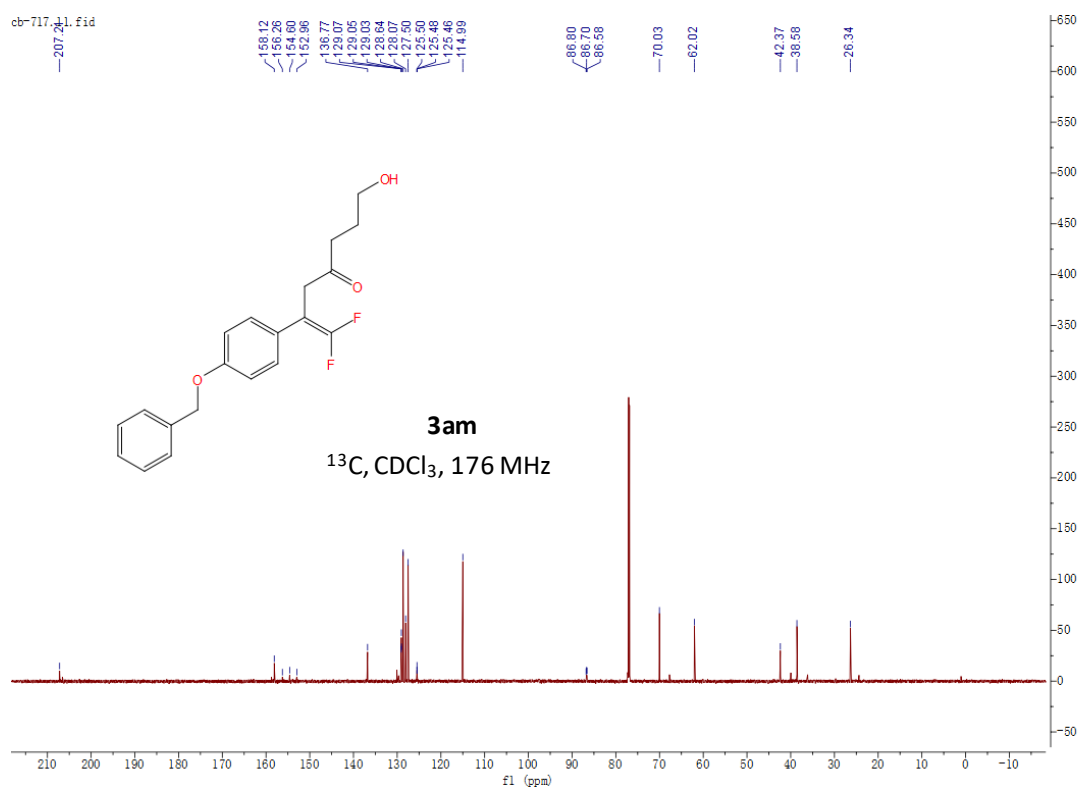

cb-717-2  
Recorded on Oxford Instruments X-Pulse

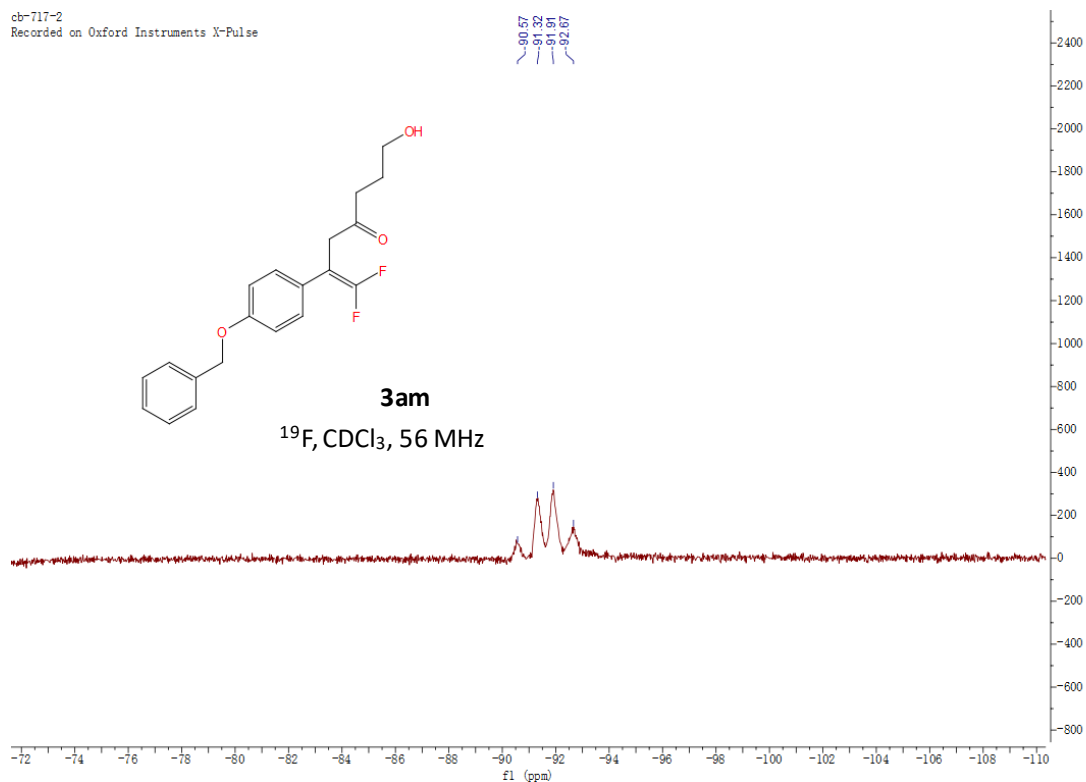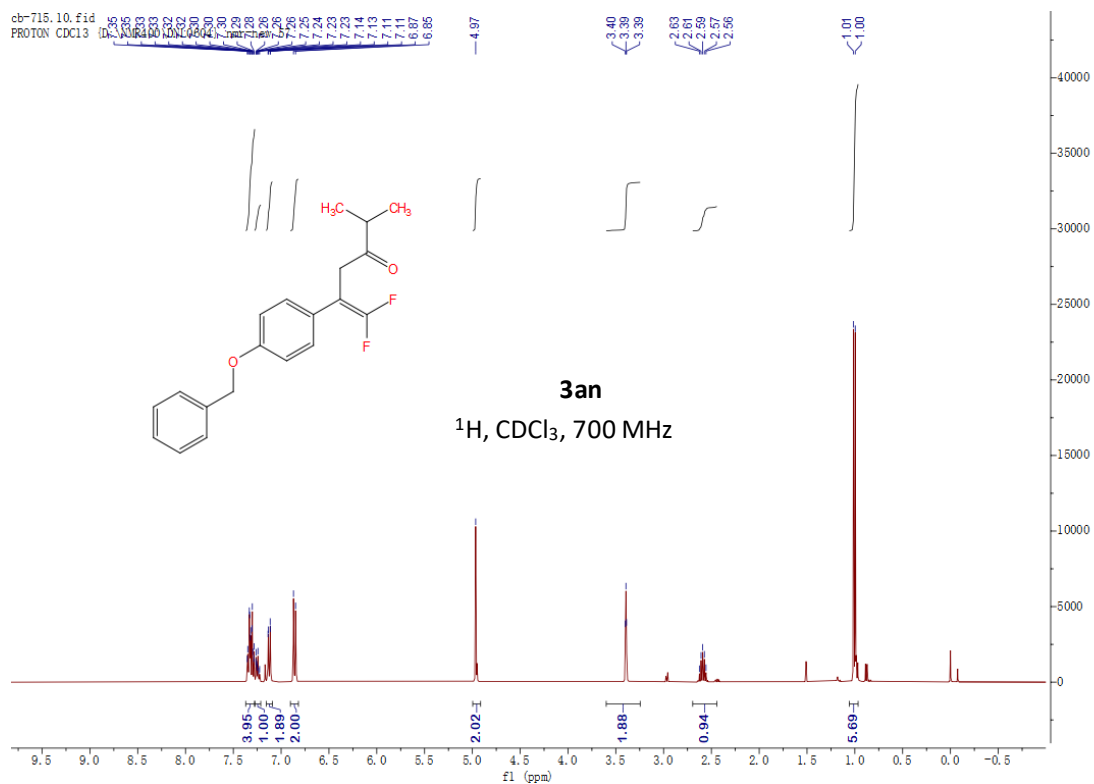

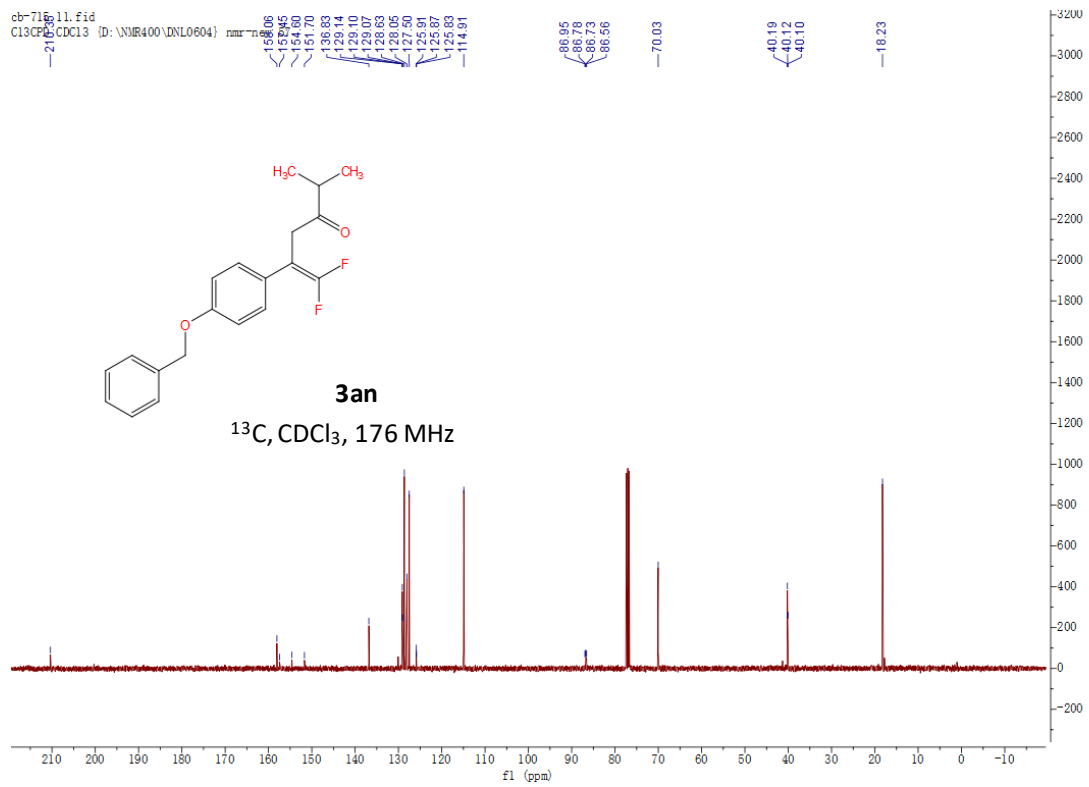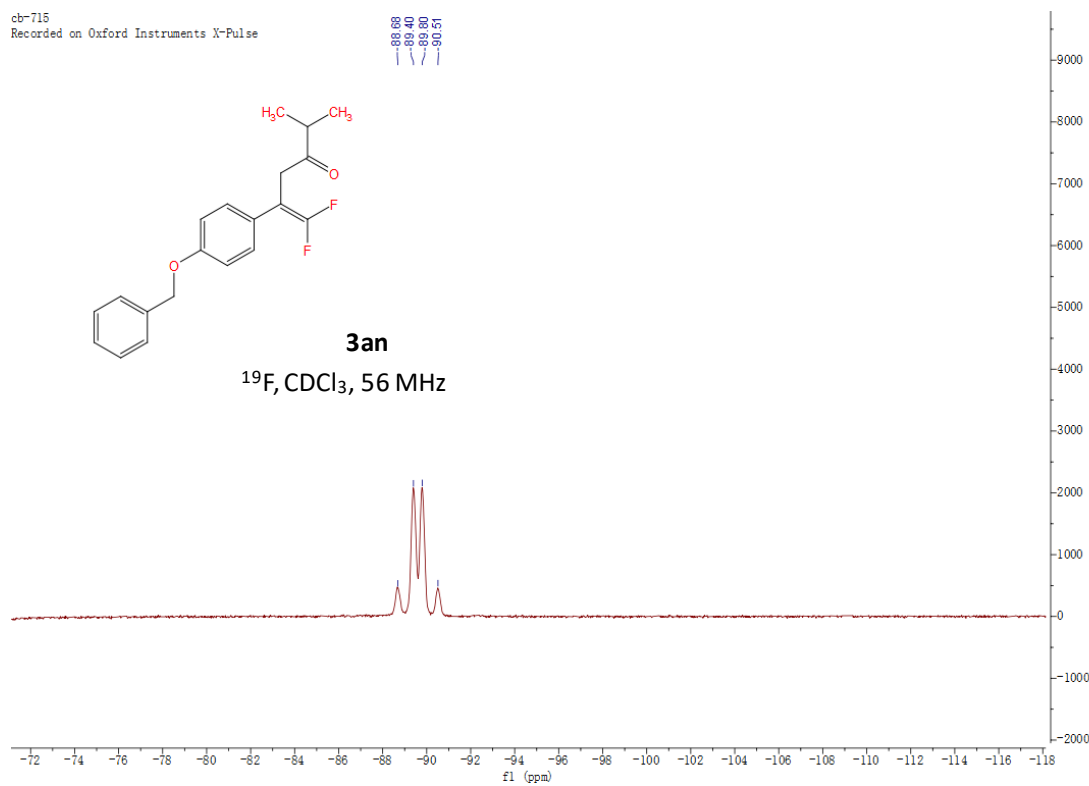

cb-700-2.10.fid

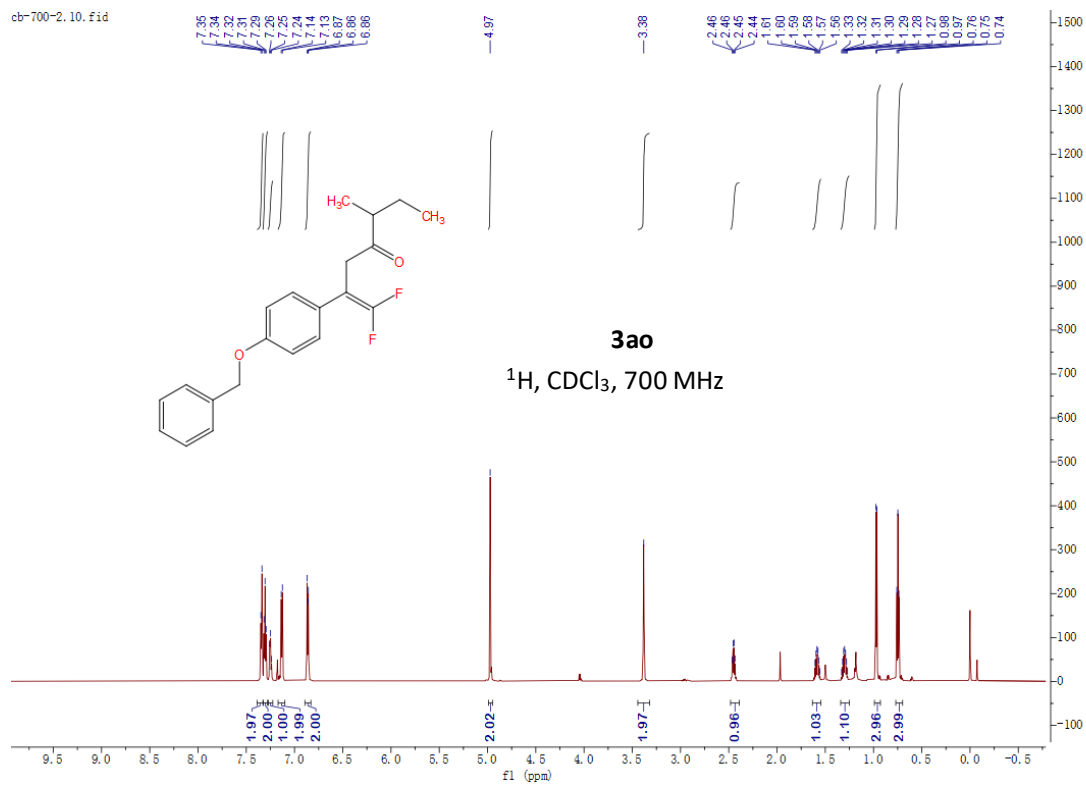

cb-700-2.11.fid

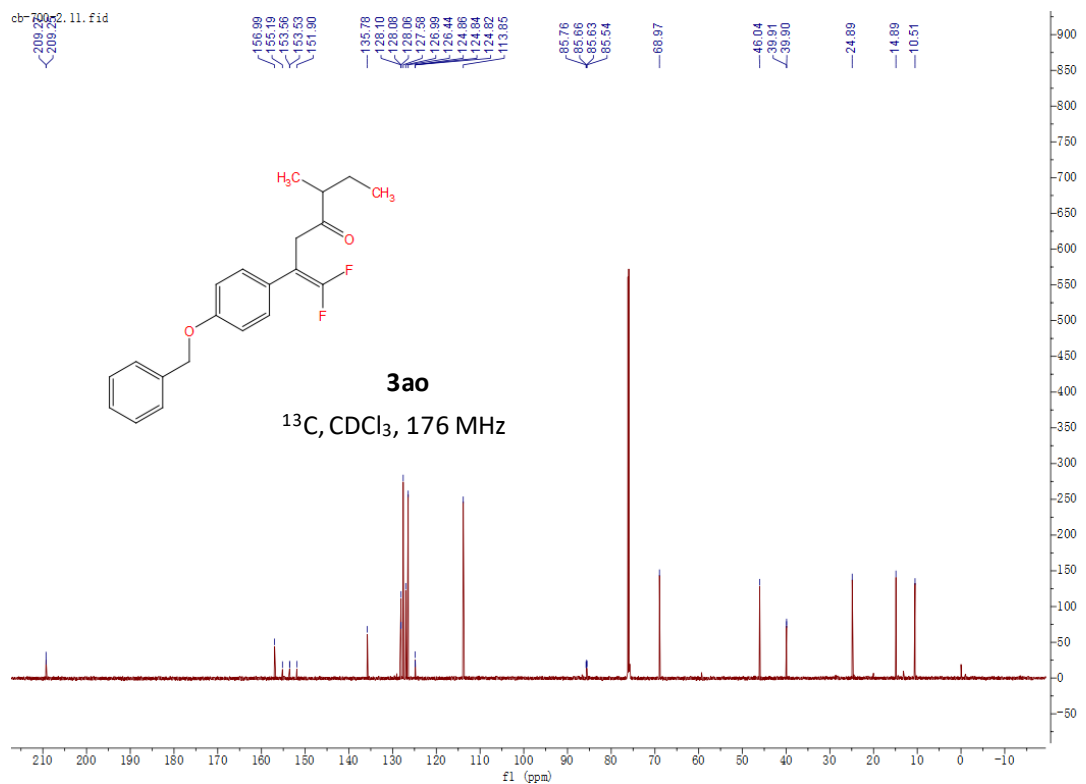

cb-700  
Recorded on Oxford Instruments X-Pulse

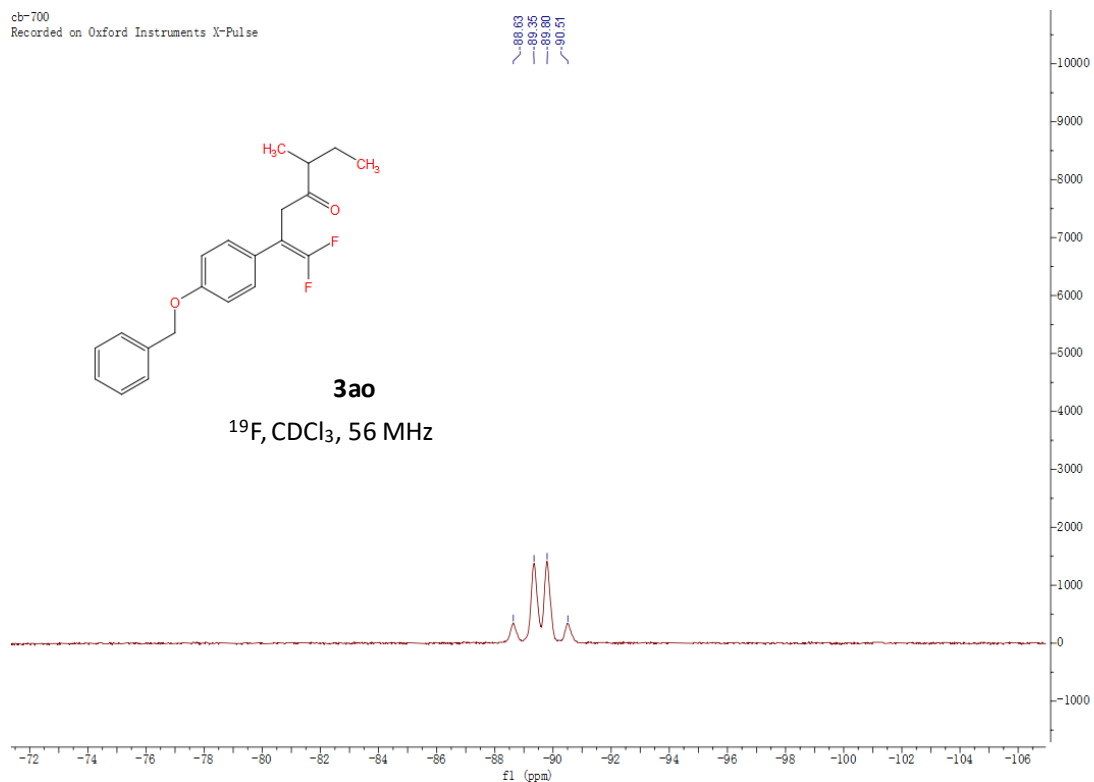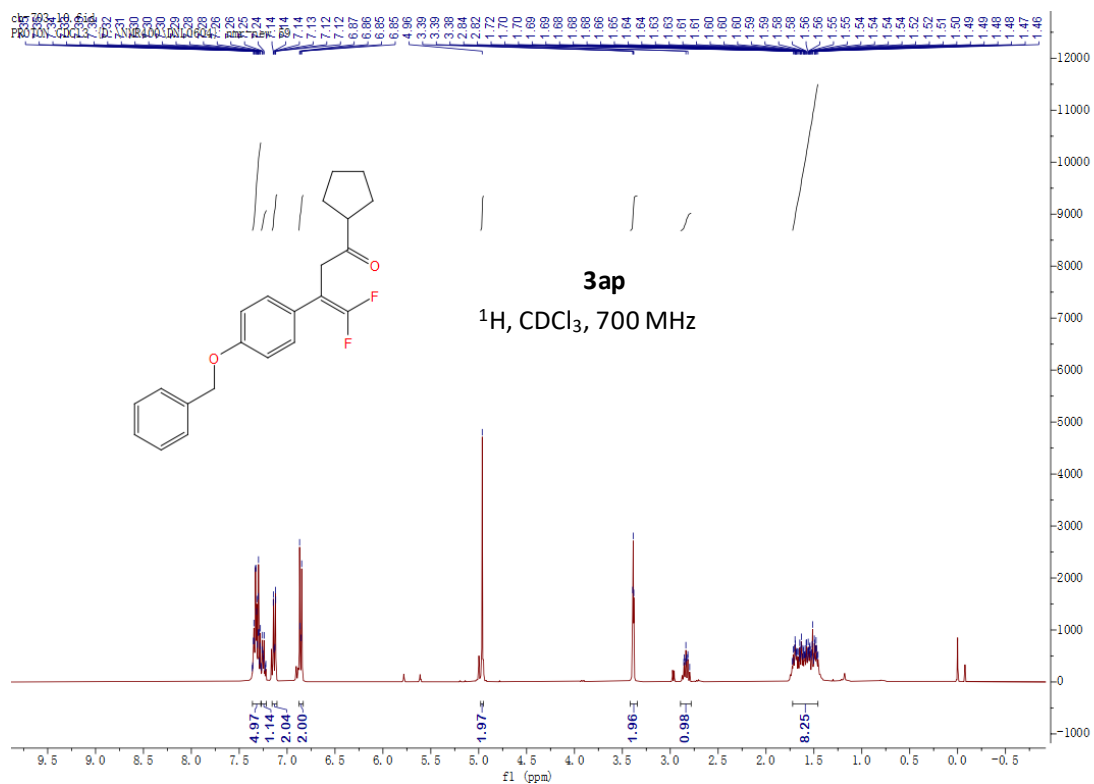

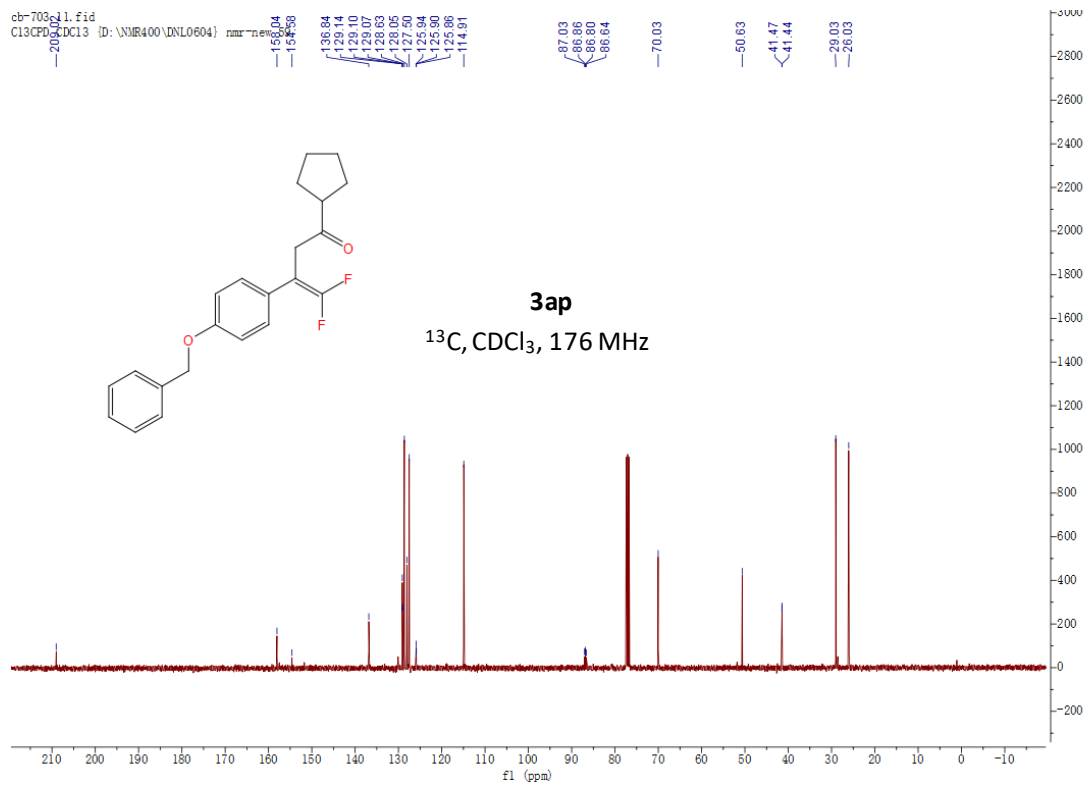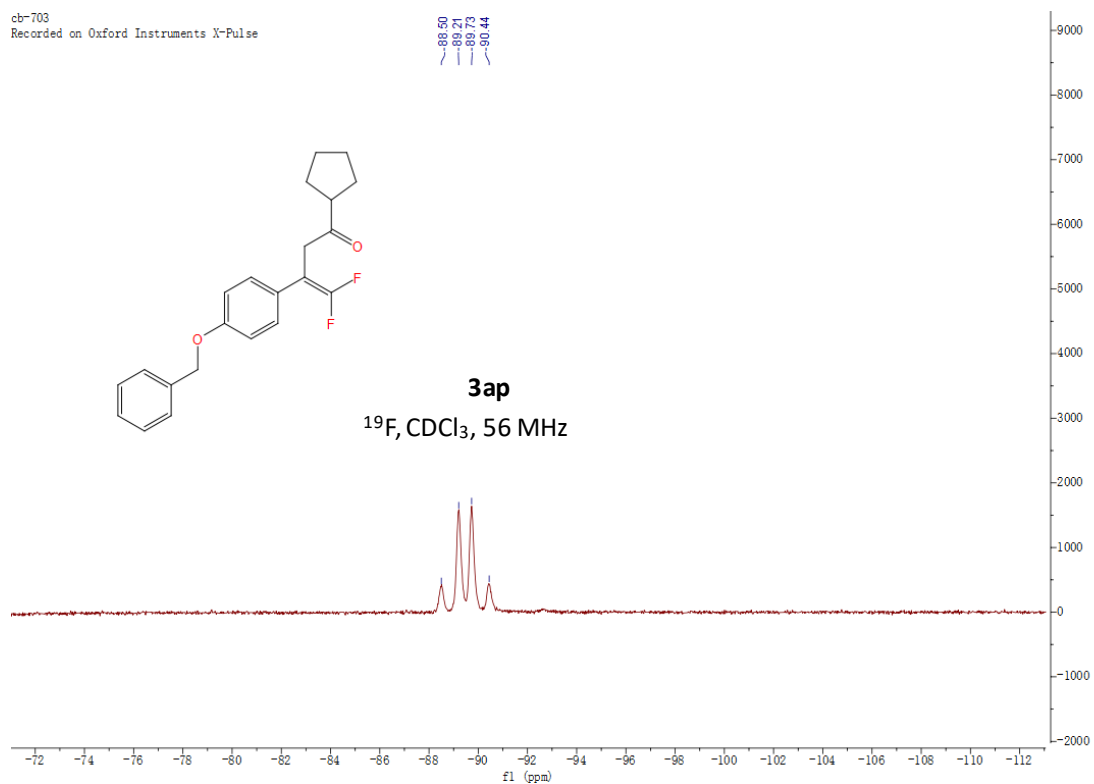

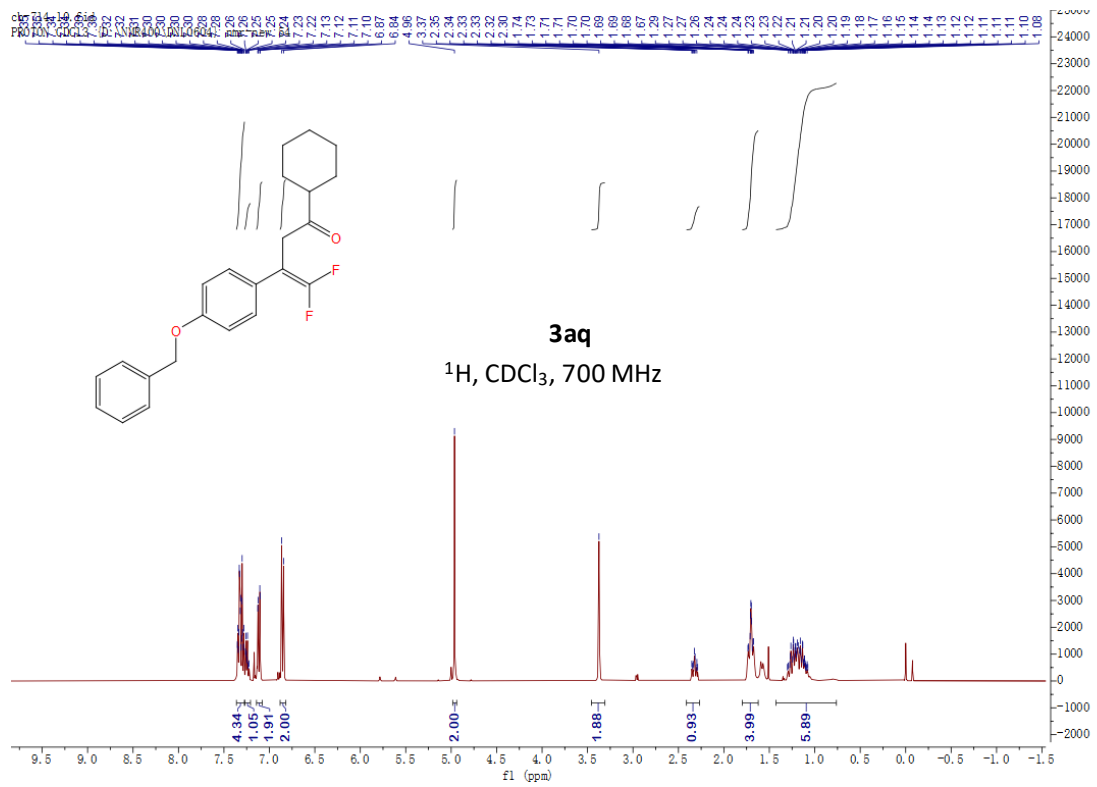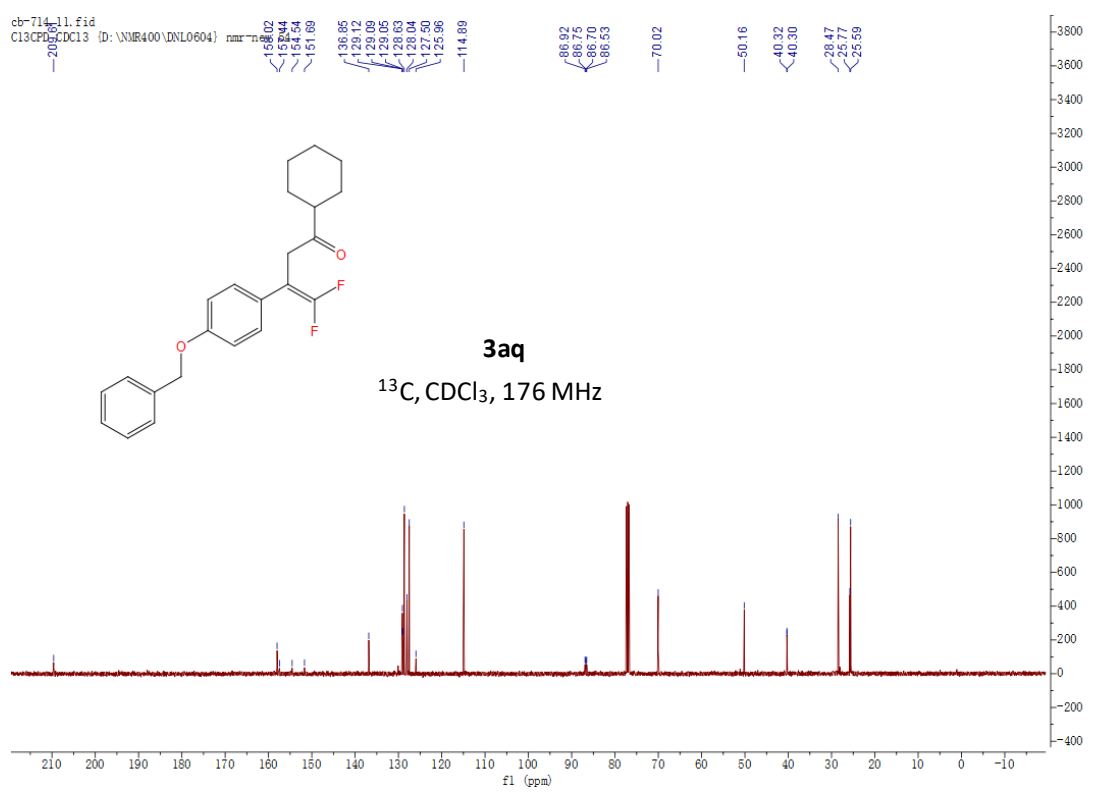



cb-714  
Recorded on Oxford Instruments X-Pulse

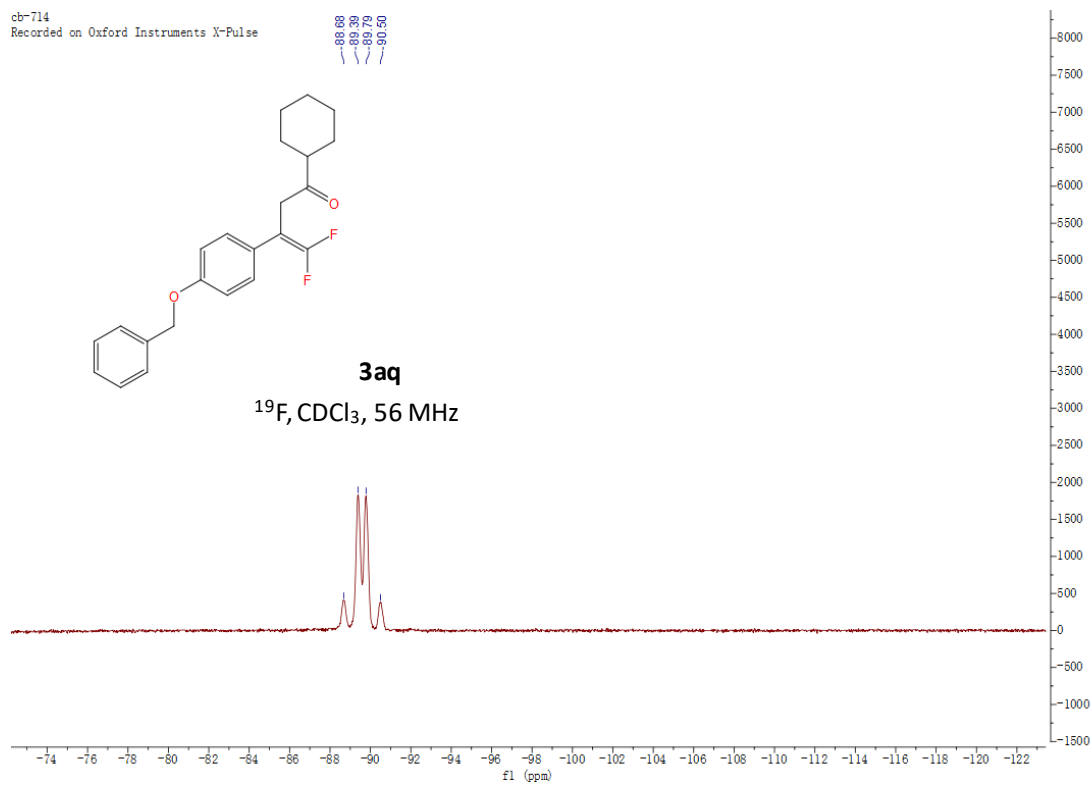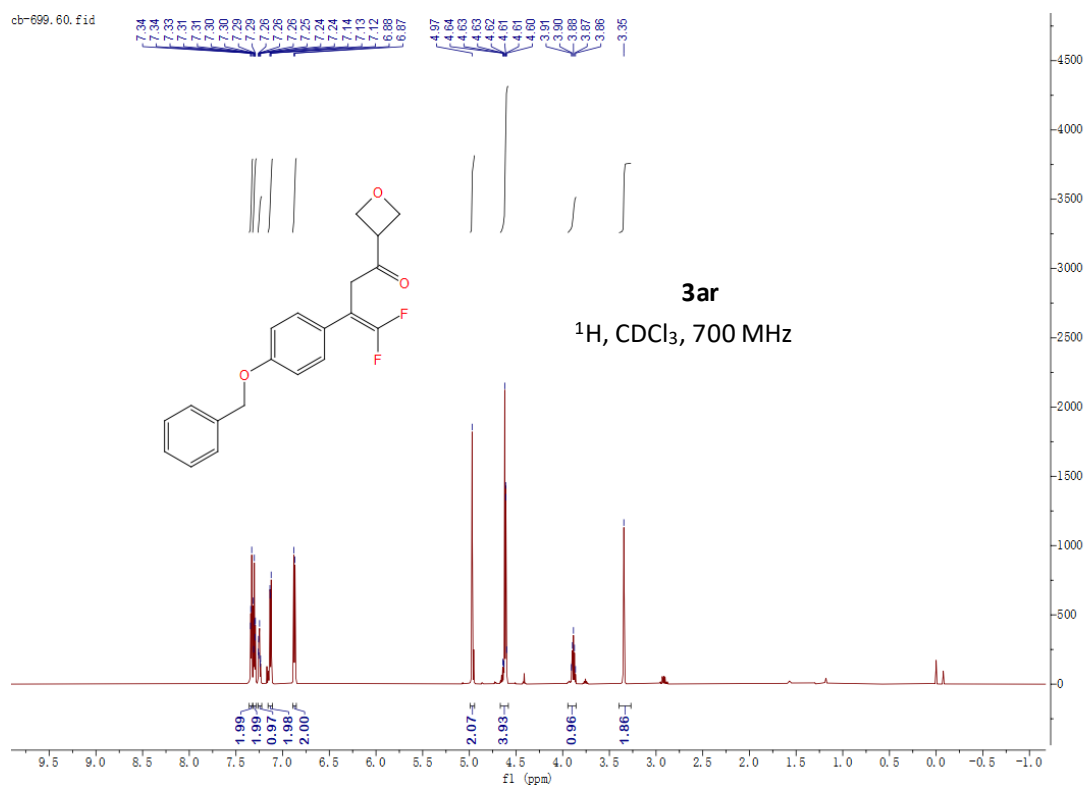

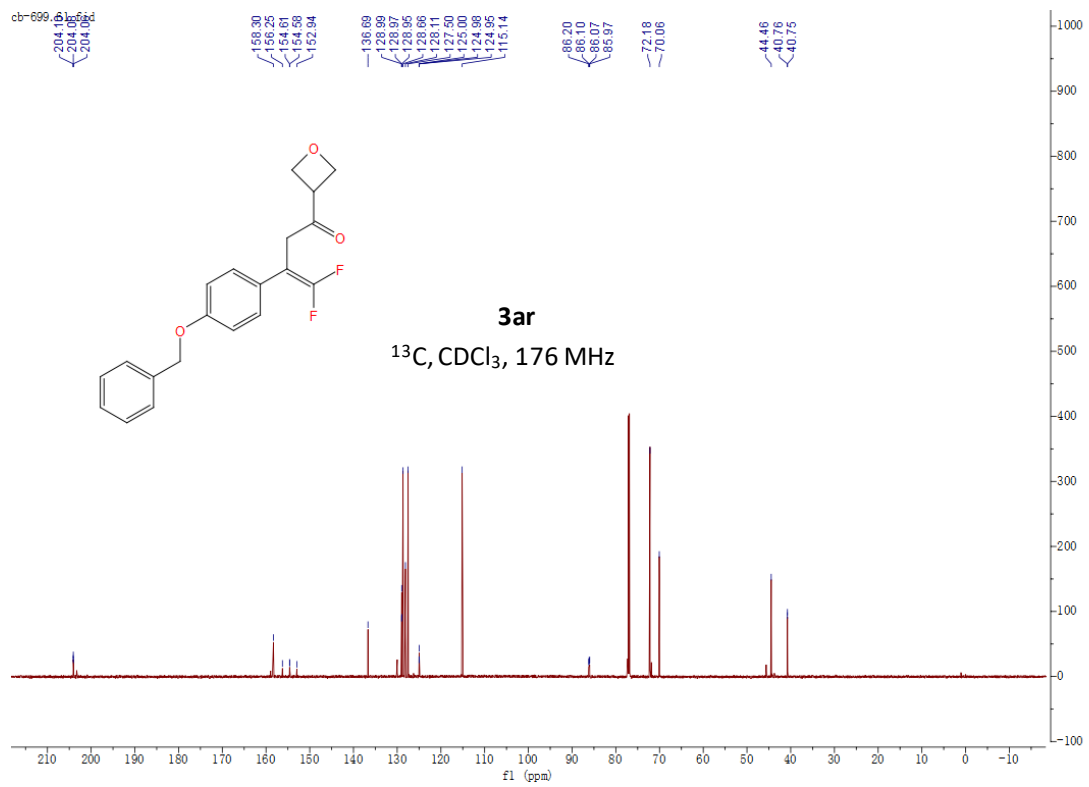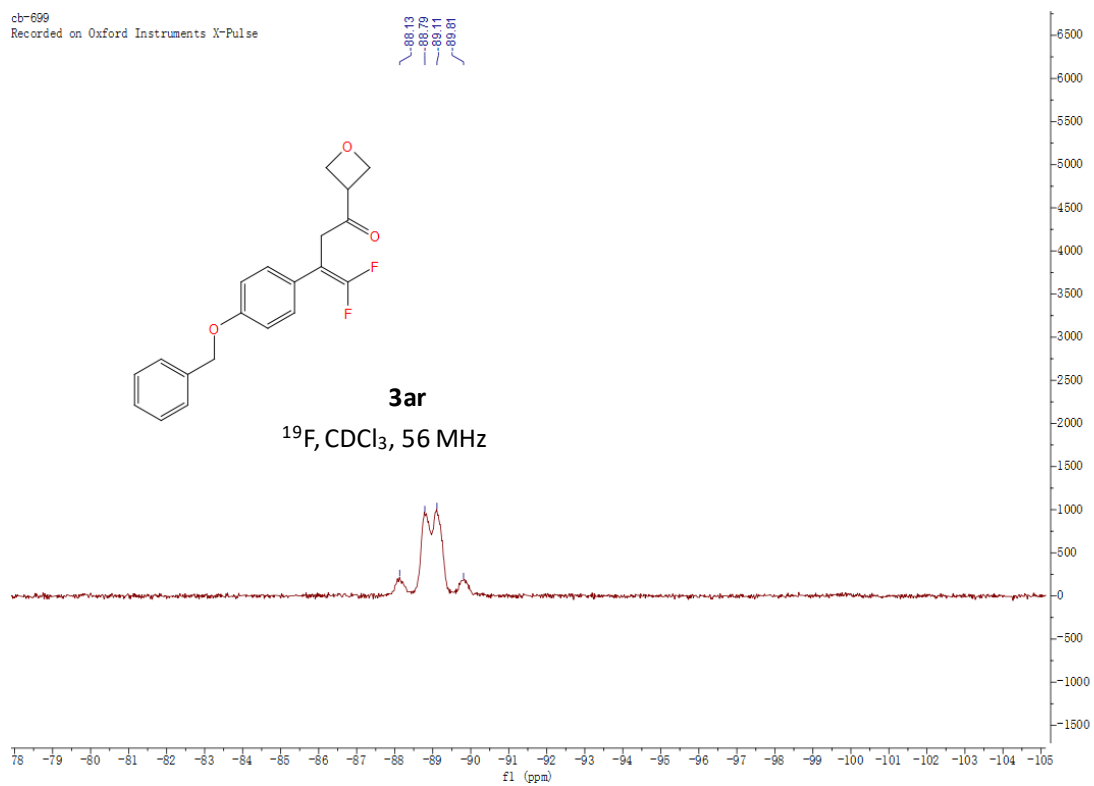



cb-704  
Recorded on Oxford Instruments X-Pulse

98.37  
98.08  
98.42  
90.13

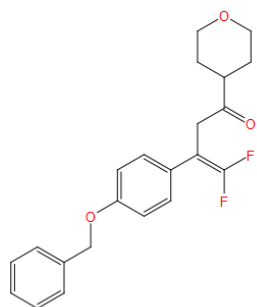

**3as**  
 $^{19}\text{F}$ ,  $\text{CDCl}_3$ , 56 MHz

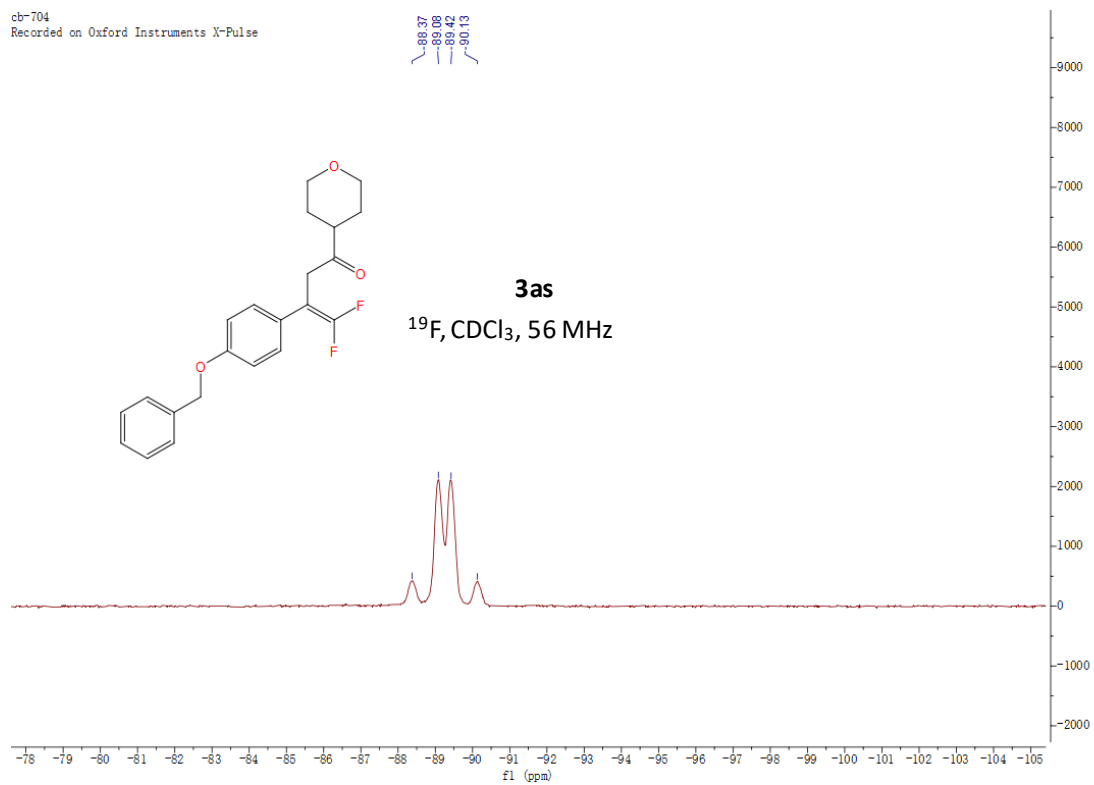

cb-707.10.616  
PROTON  $\text{CDCl}_3$

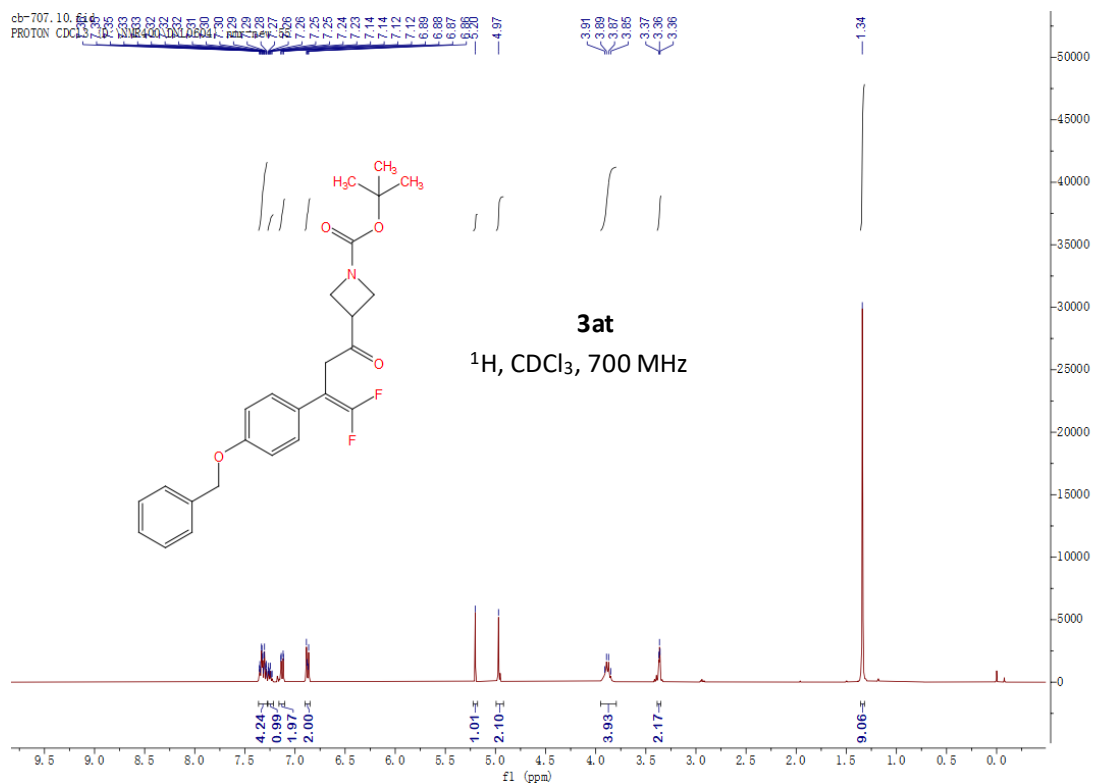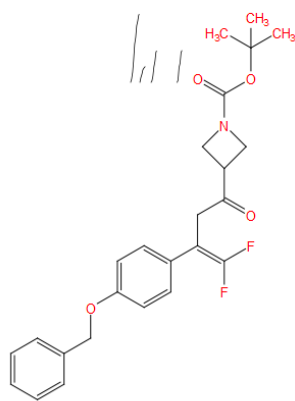

**3at**  
 $^1\text{H}$ ,  $\text{CDCl}_3$ , 700 MHz

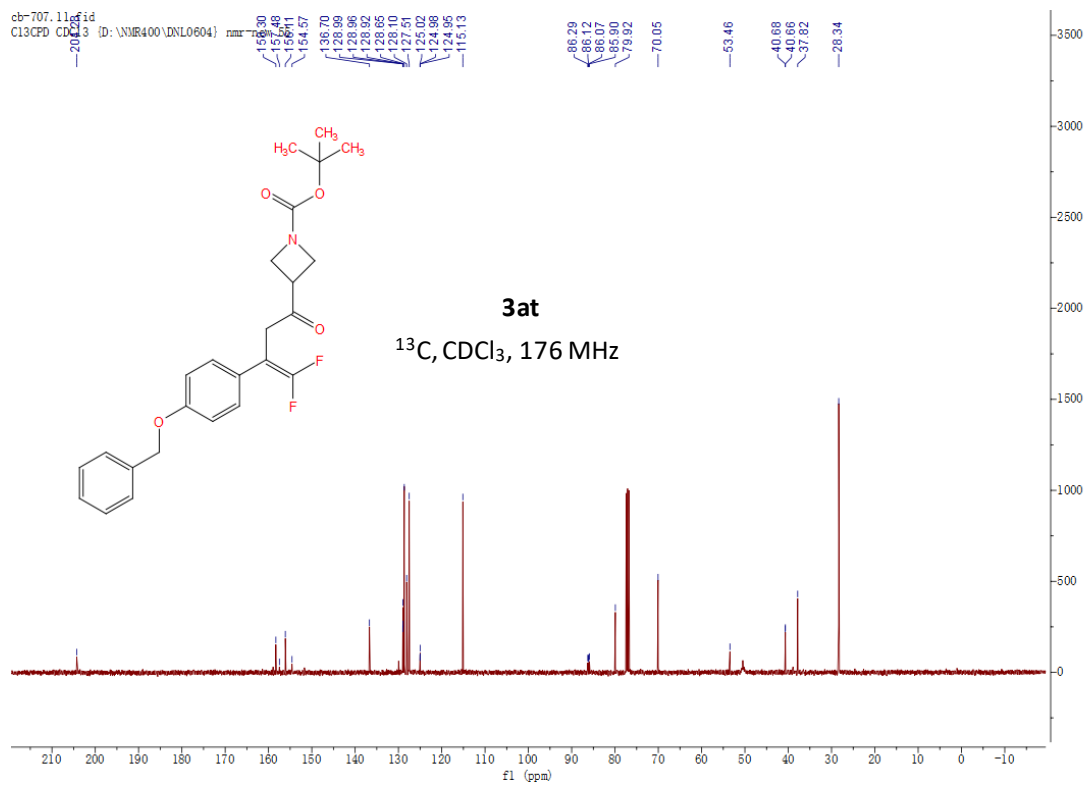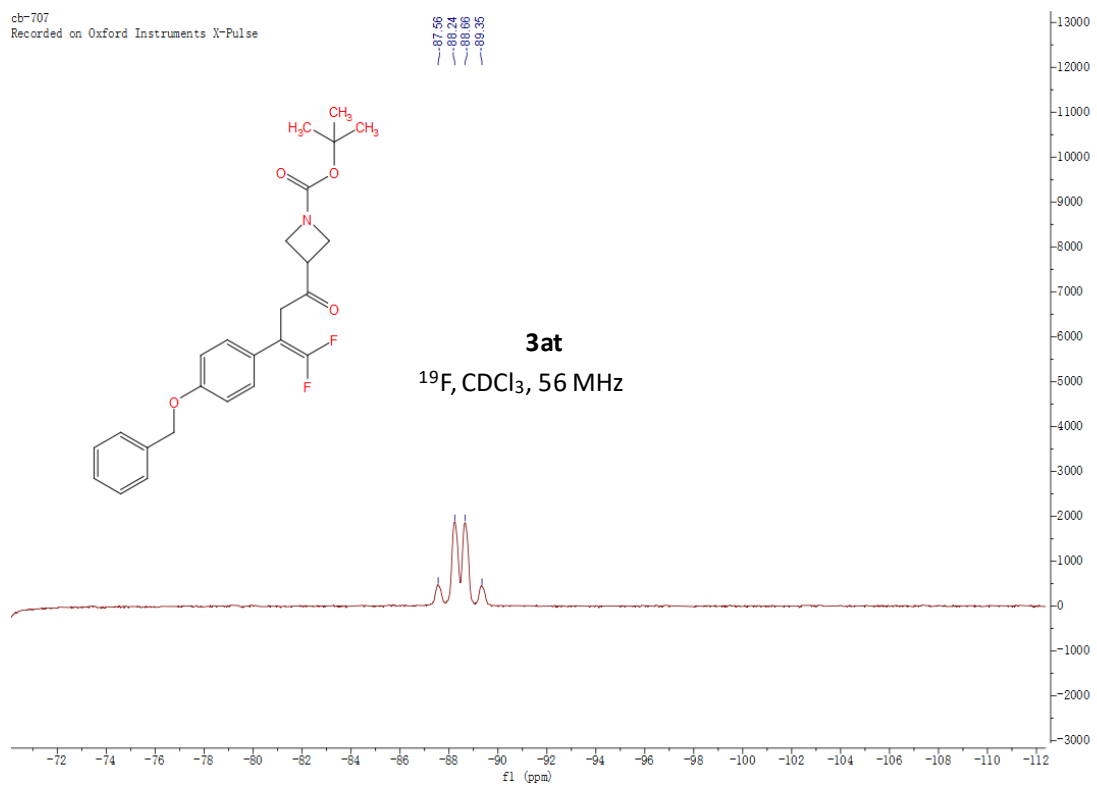

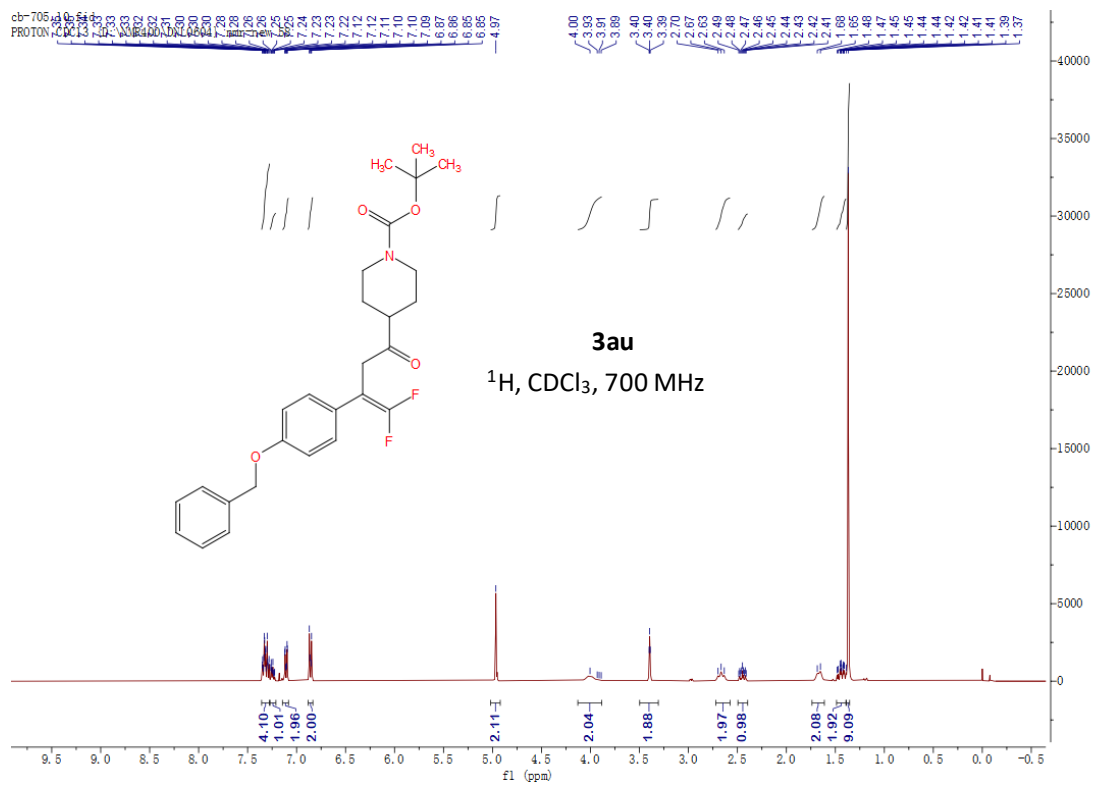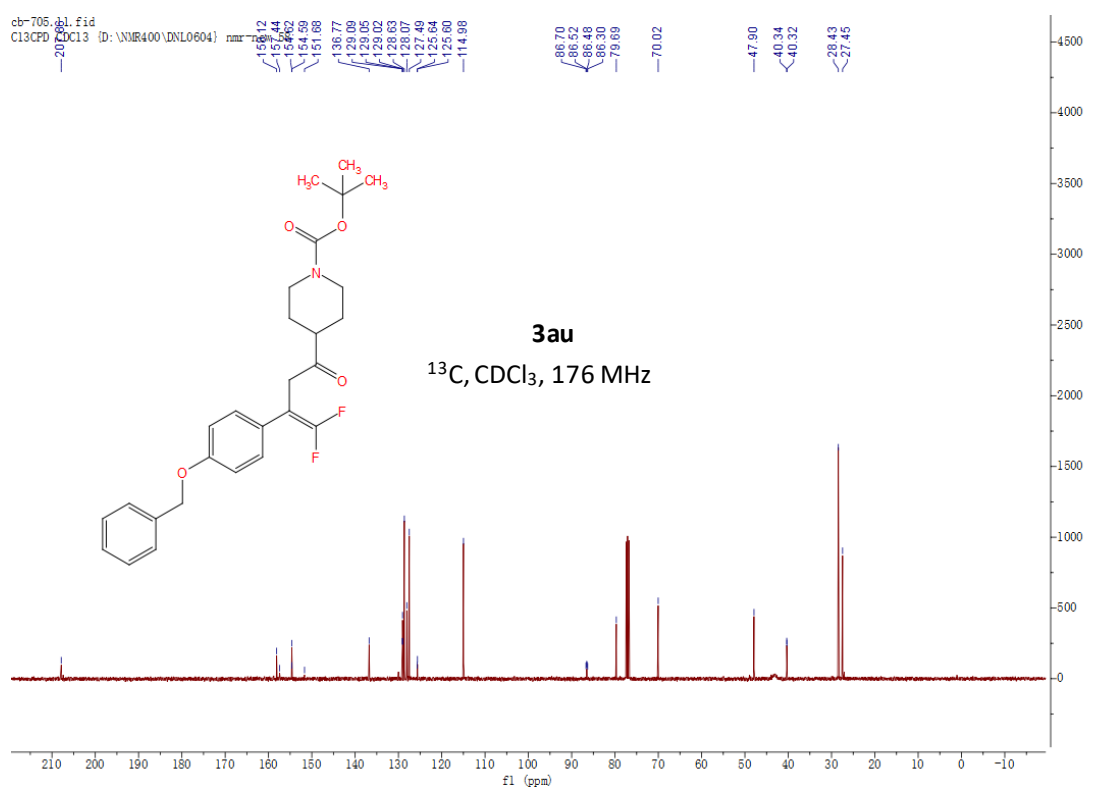

cb-705  
Recorded on Oxford Instruments X-Pulse

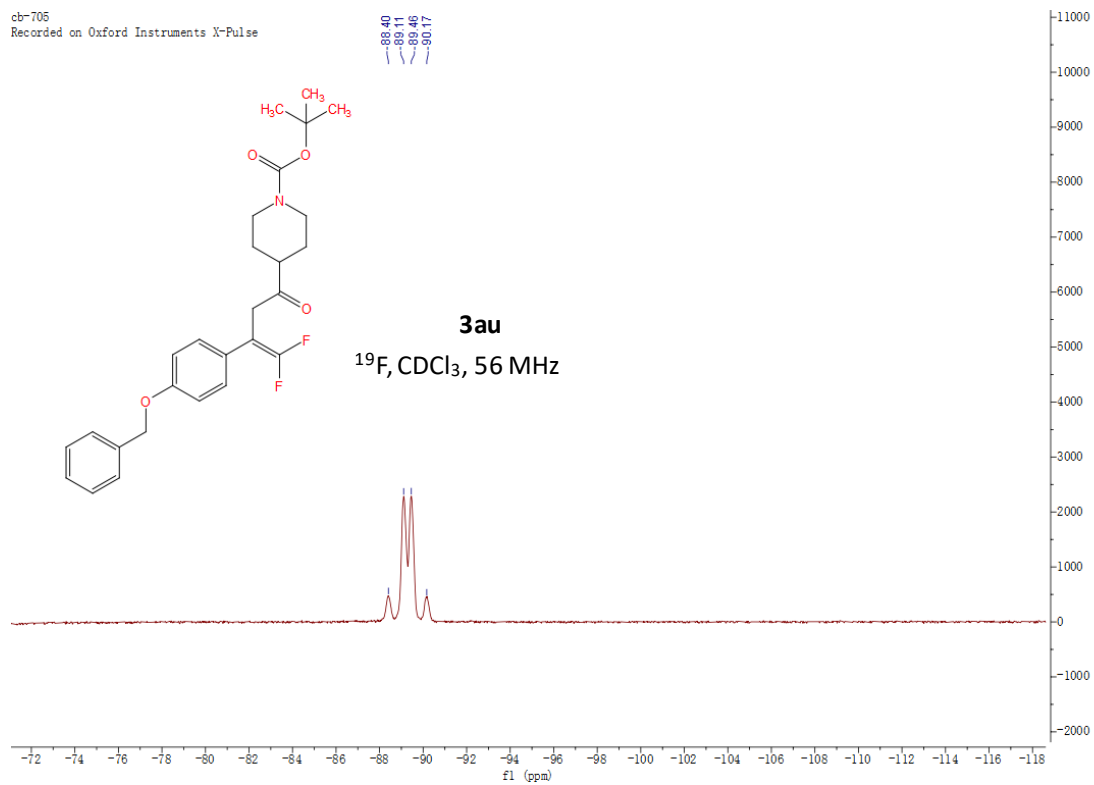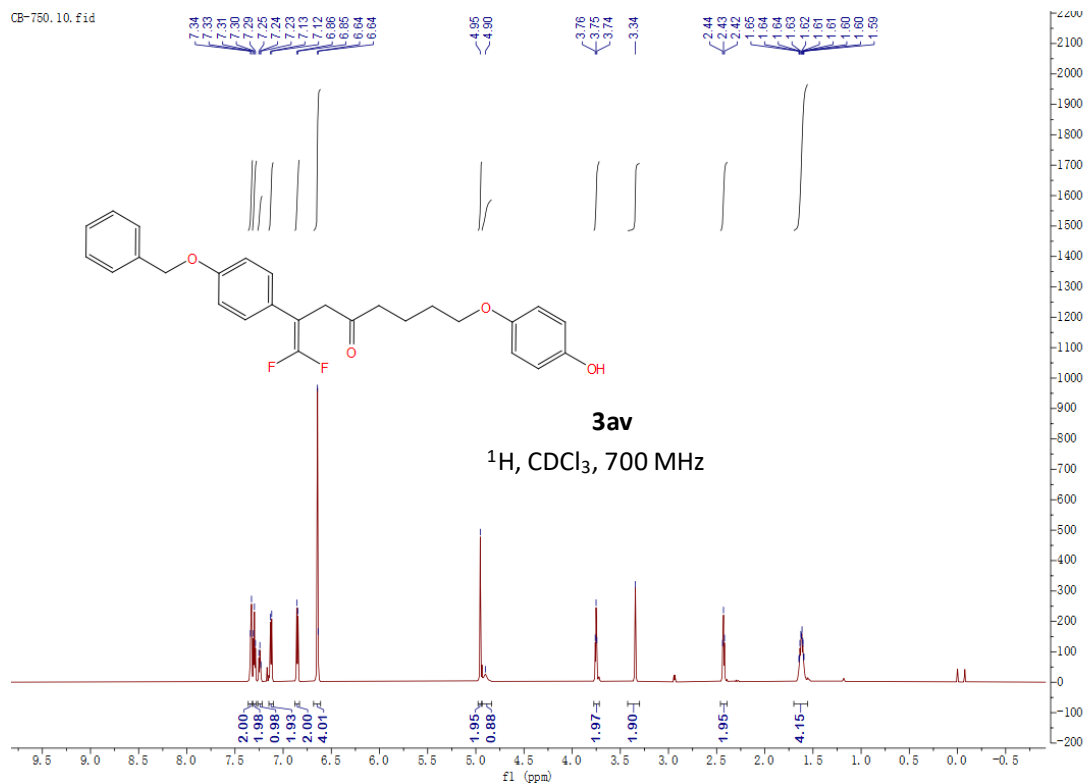

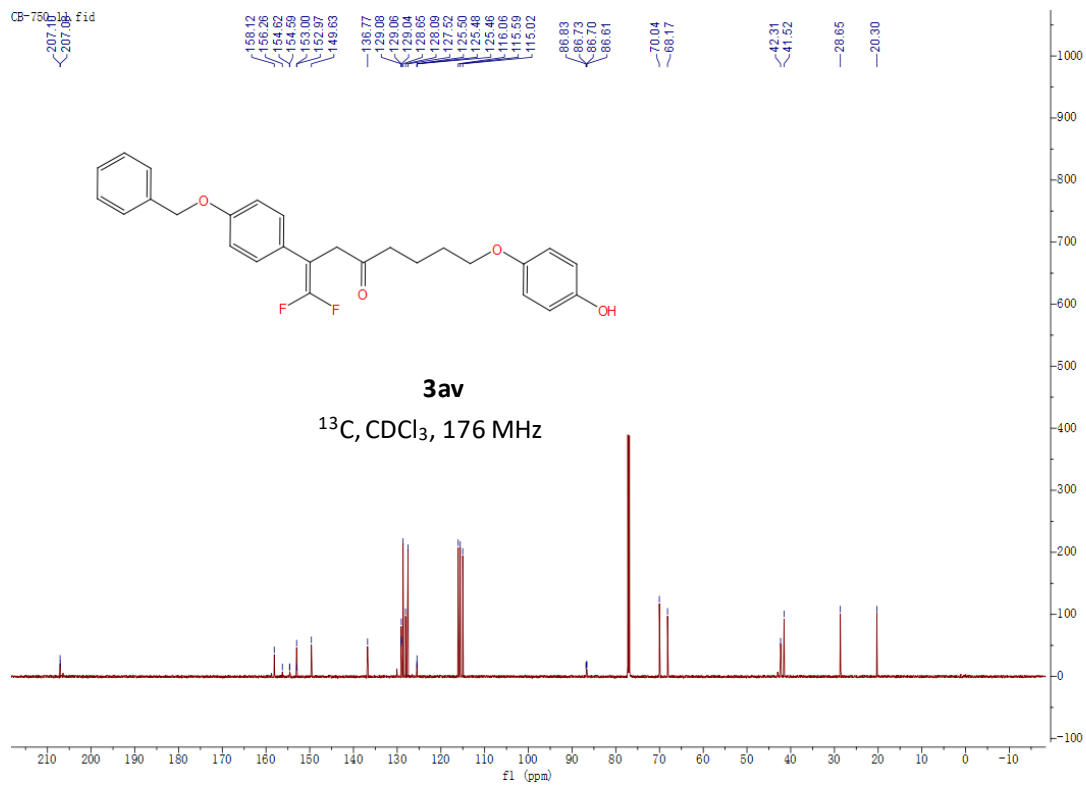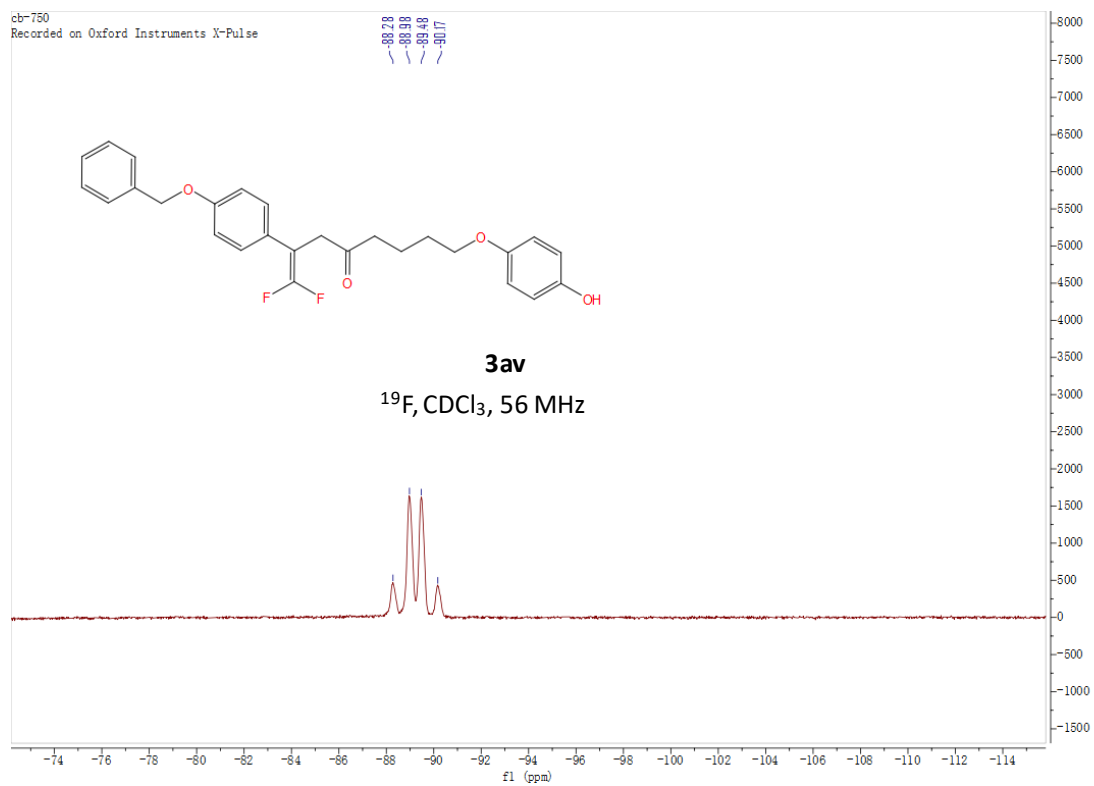





cb-752  
Recorded on Oxford Instruments X-Pulse

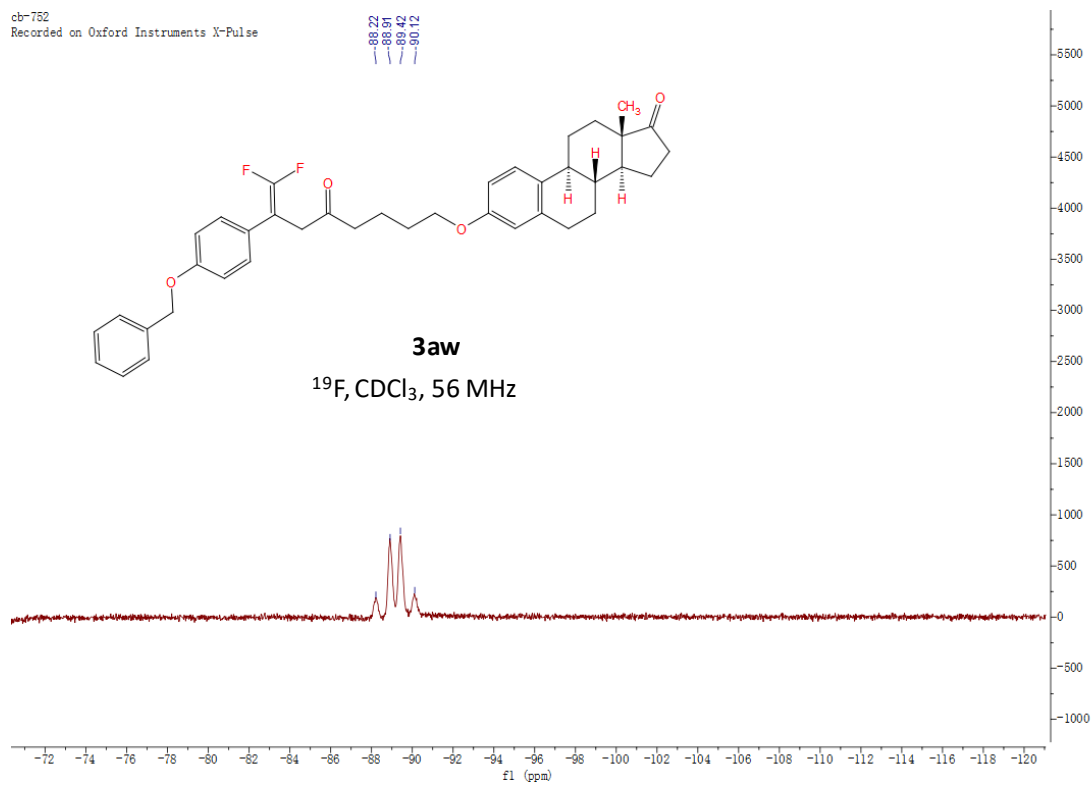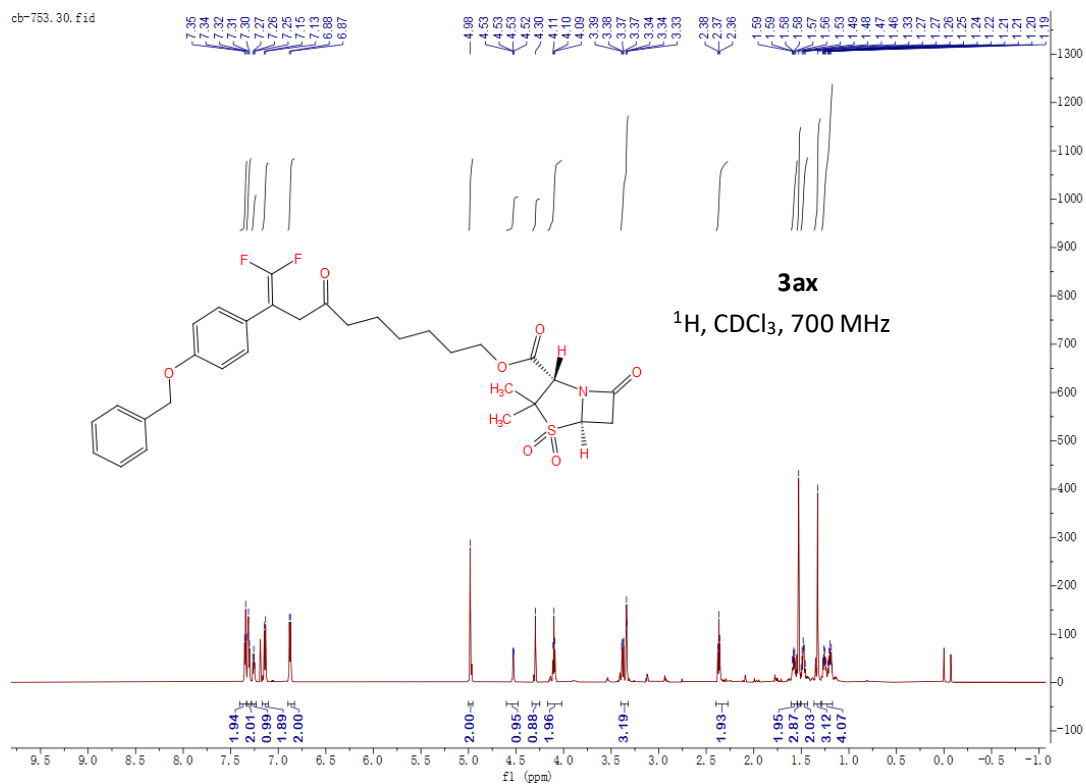

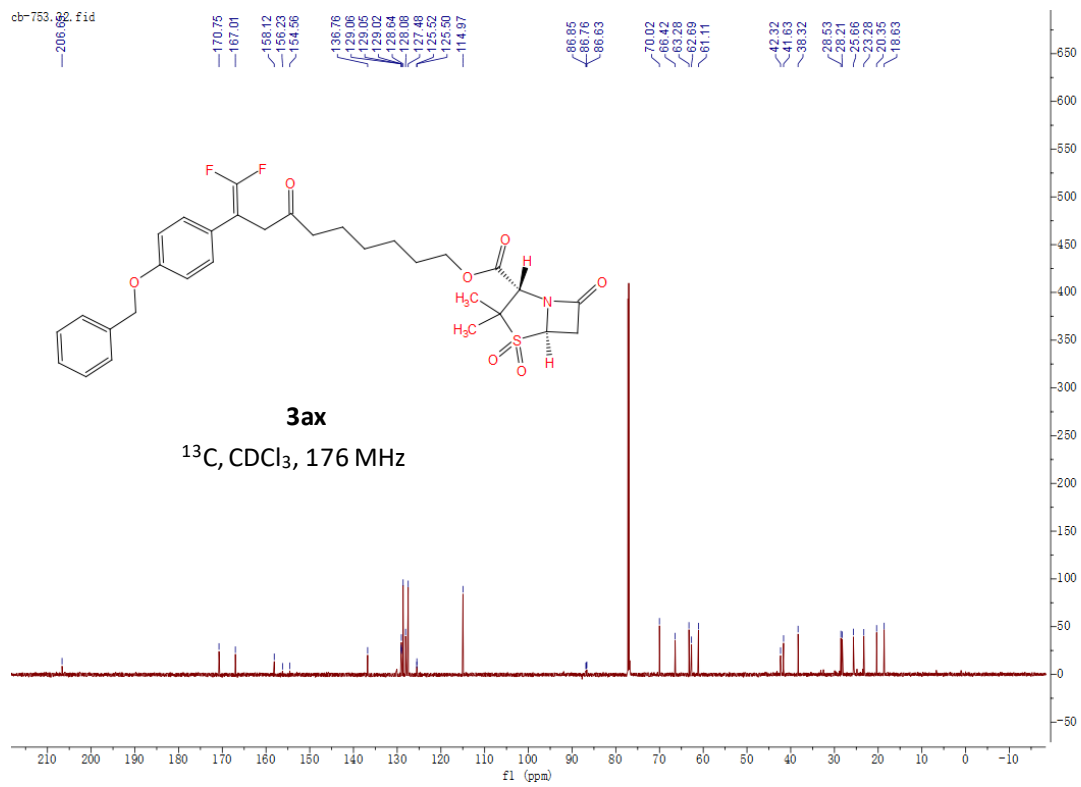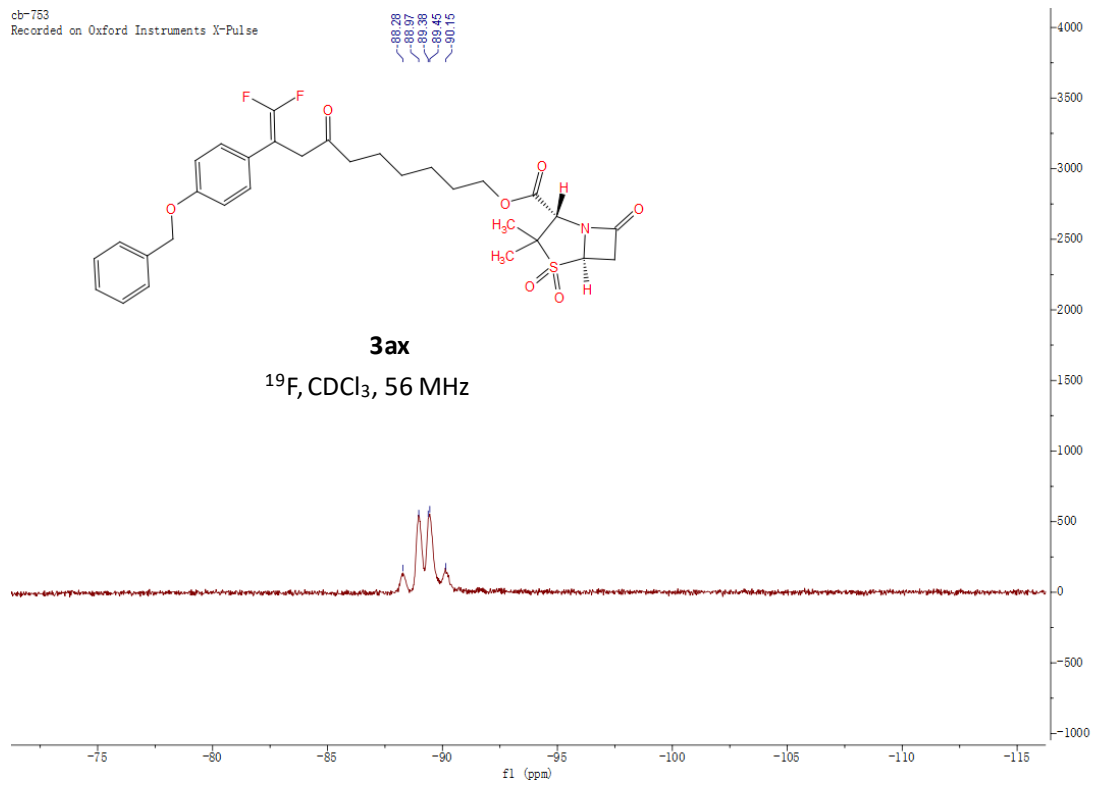



cb-755  
Recorded on Oxford Instruments X-Pulse

88.61  
88.38  
88.82  
90.54

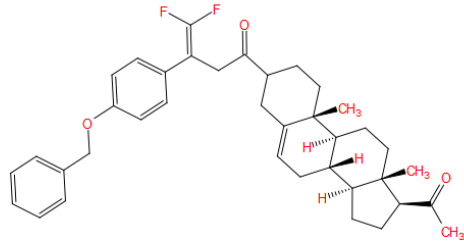

**3ay**

$^{19}\text{F}$ ,  $\text{CDCl}_3$ , 56 MHz

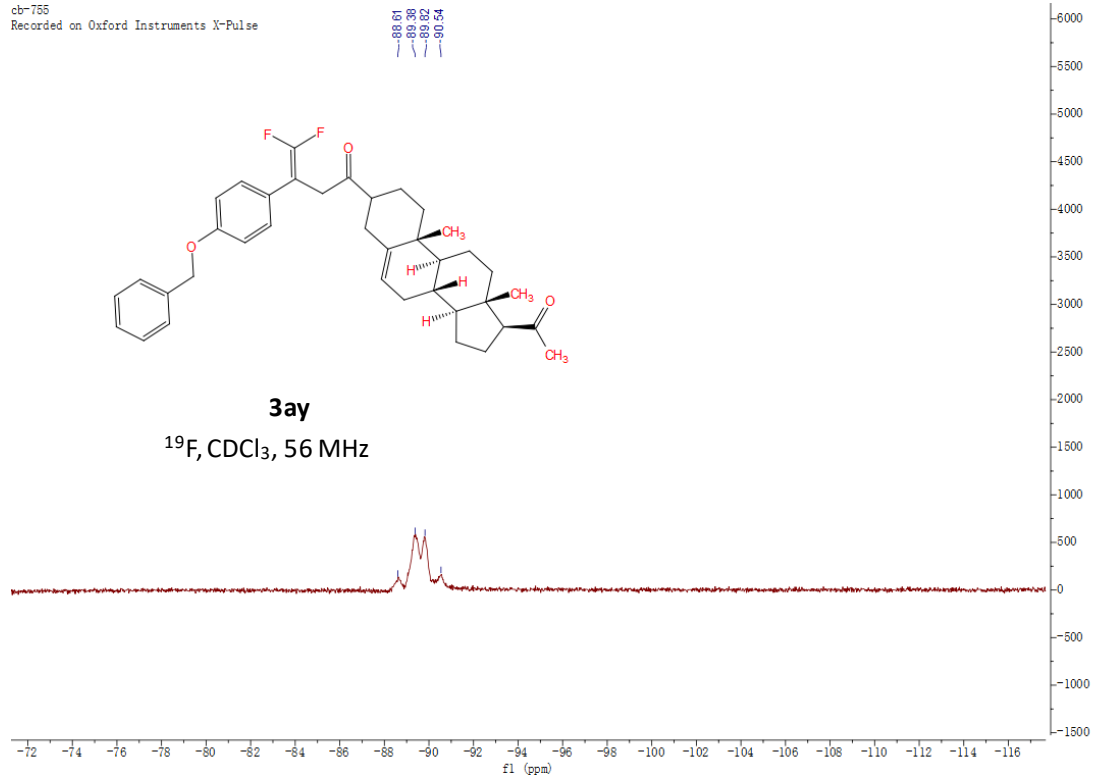

CB-749-2.30.fid

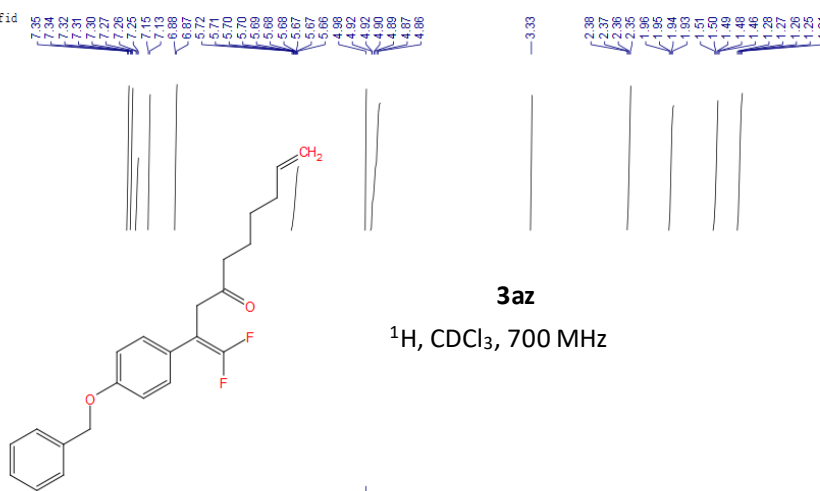

**3az**

$^1\text{H}$ ,  $\text{CDCl}_3$ , 700 MHz

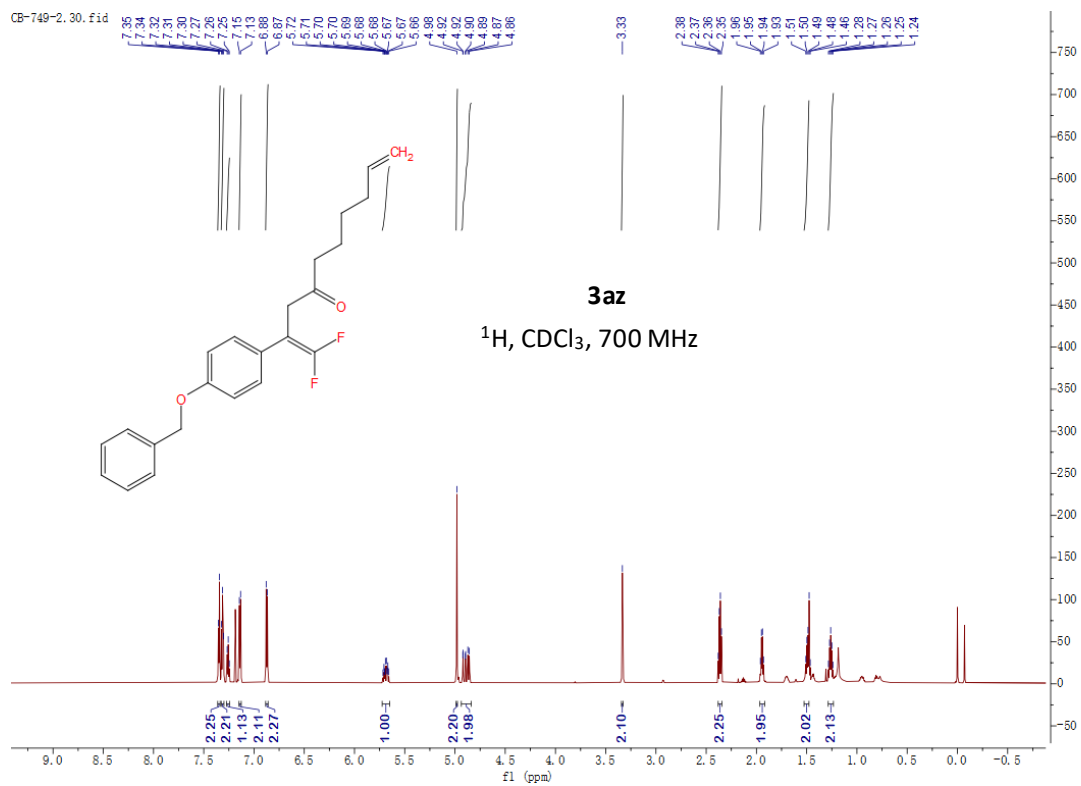

cb-749-31.fid

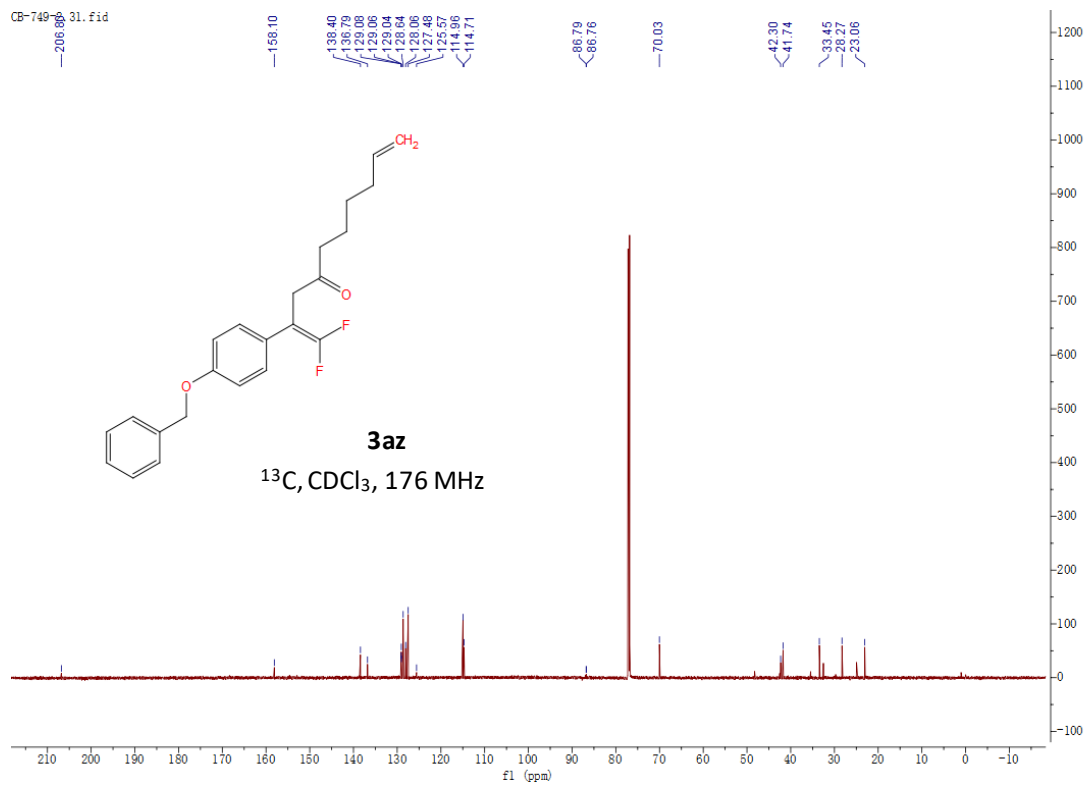

cb-749-2  
Recorded on Oxford Instruments X-Pulse

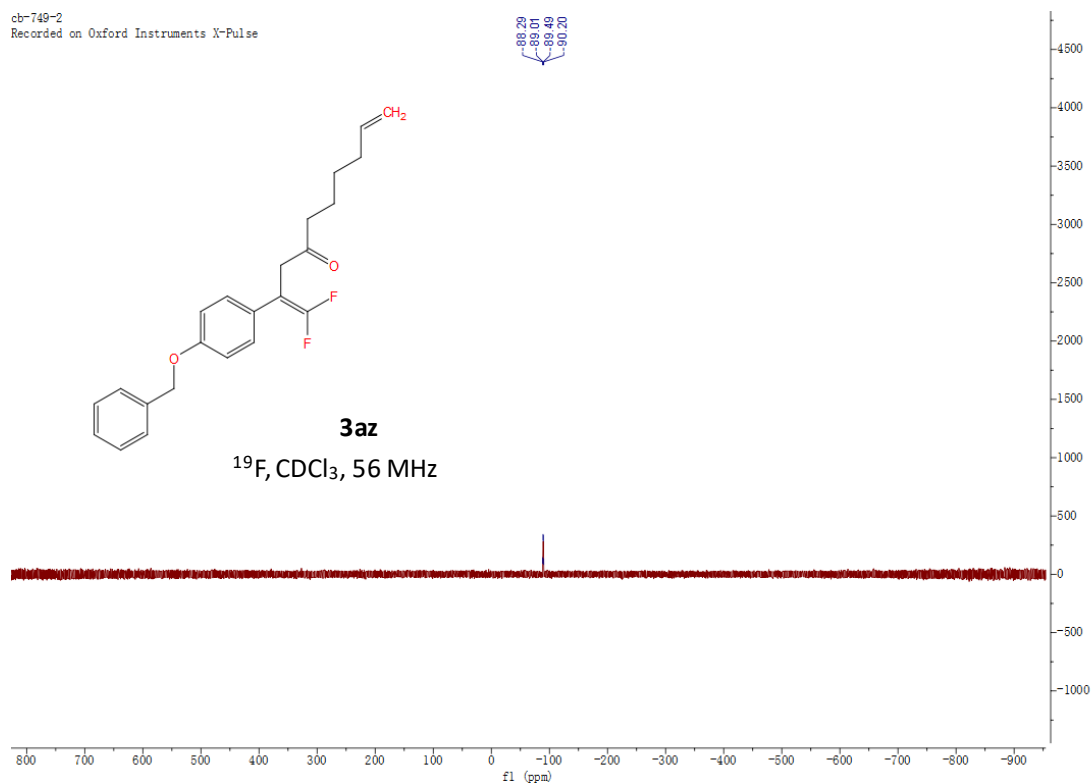

cb-694.10.fid

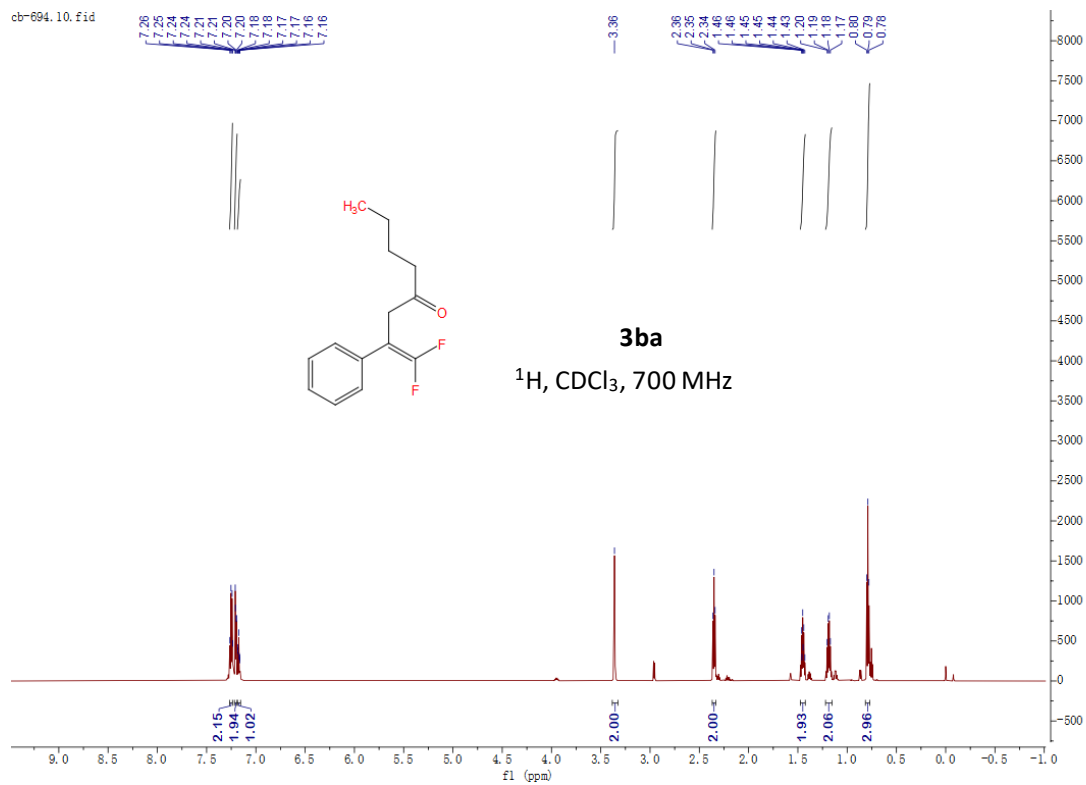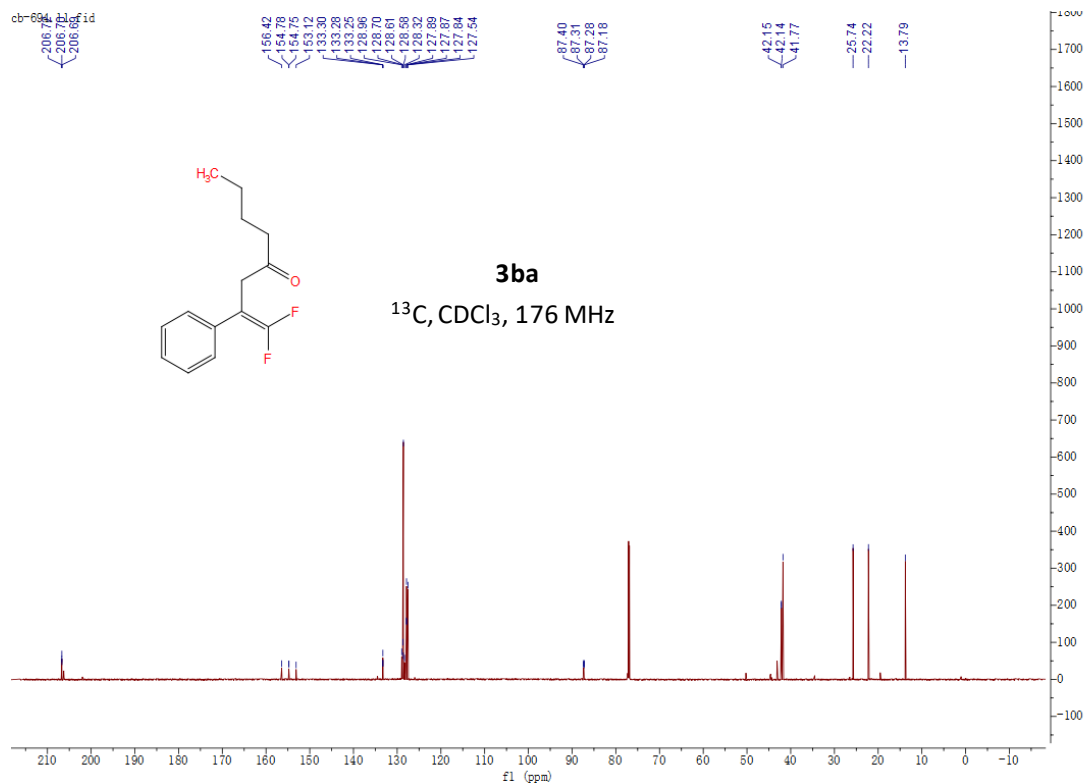

cb-694  
Recorded on Oxford Instruments X-Pulse

— 87.45  
— 86.16  
— 85.80  
— 85.46

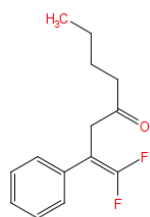

**3ba**  
<sup>19</sup>F, CDCl<sub>3</sub>, 56 MHz

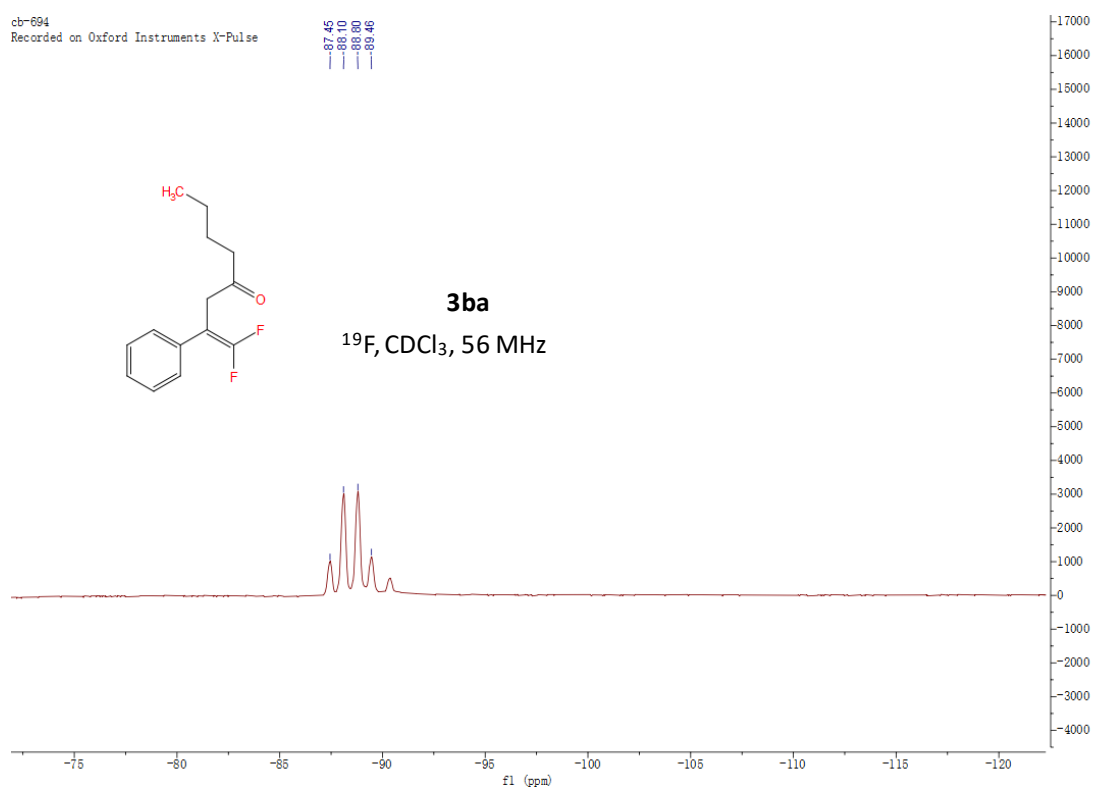

CB-720.10.fid

7.11  
7.10  
7.07  
7.06

3.35

2.36  
2.35  
2.34  
2.33  
2.32  
2.31  
2.30  
1.46  
1.45  
1.44  
1.43  
1.22  
1.21  
1.20  
1.19  
1.17  
1.16  
0.81  
0.79

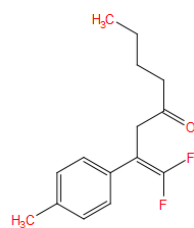

**3ca**  
<sup>1</sup>H, CDCl<sub>3</sub>, 700 MHz

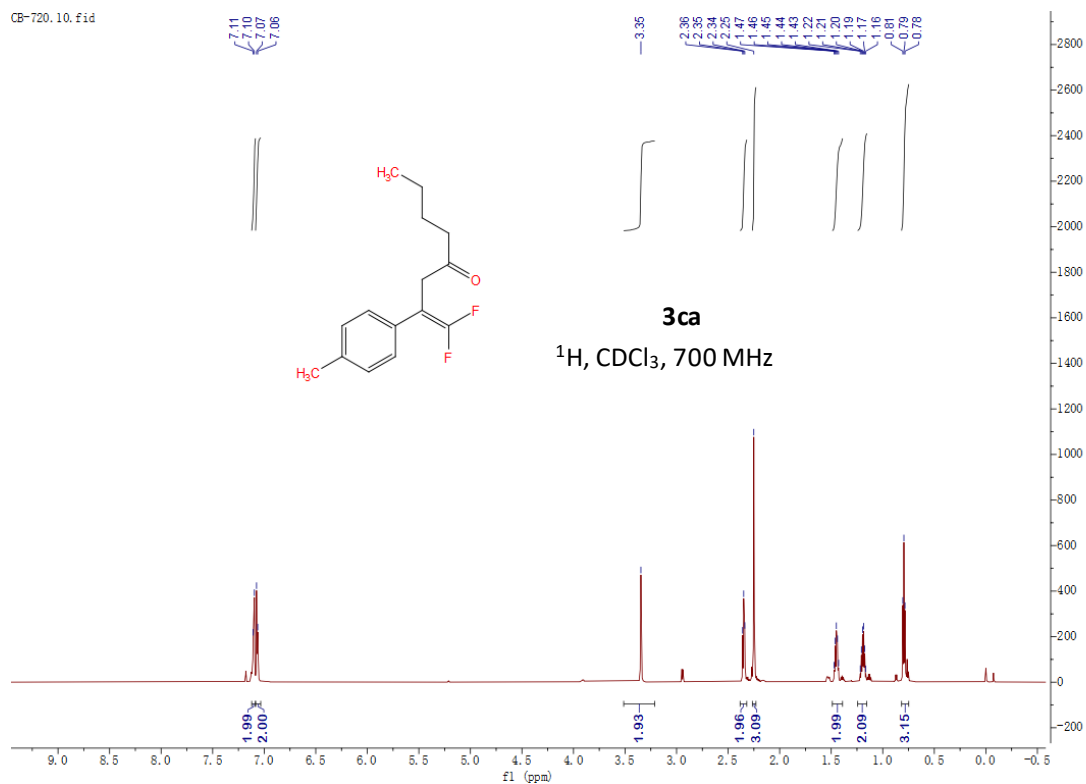



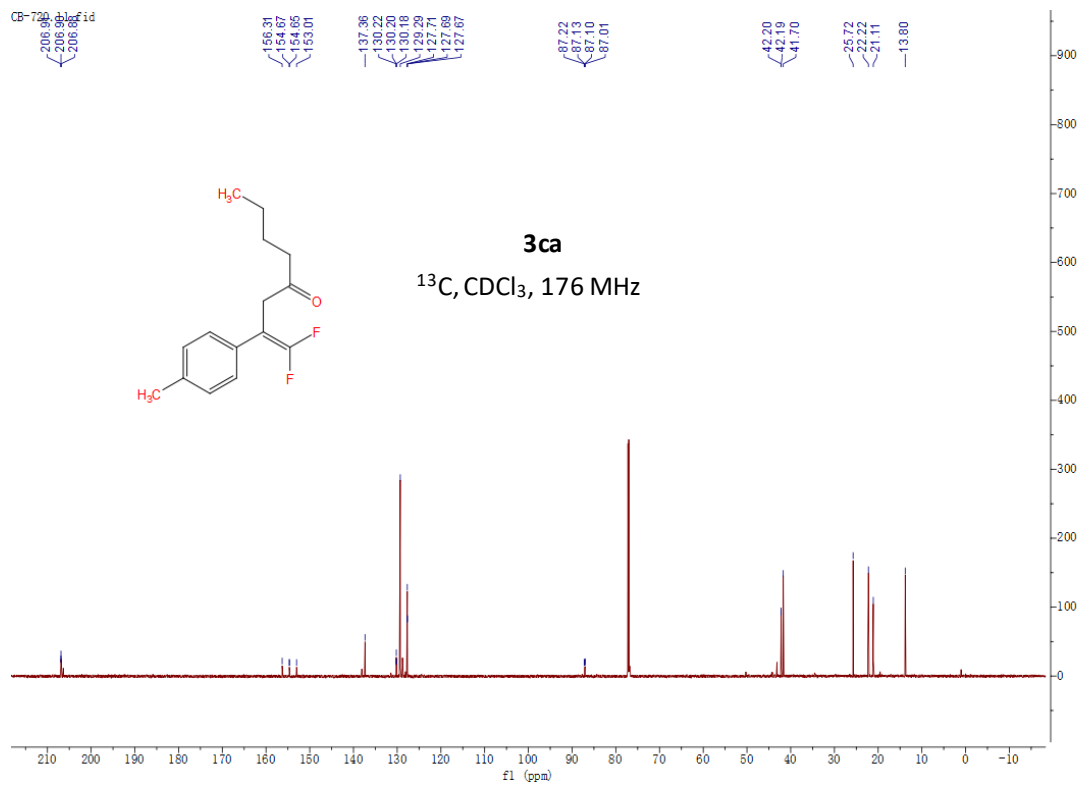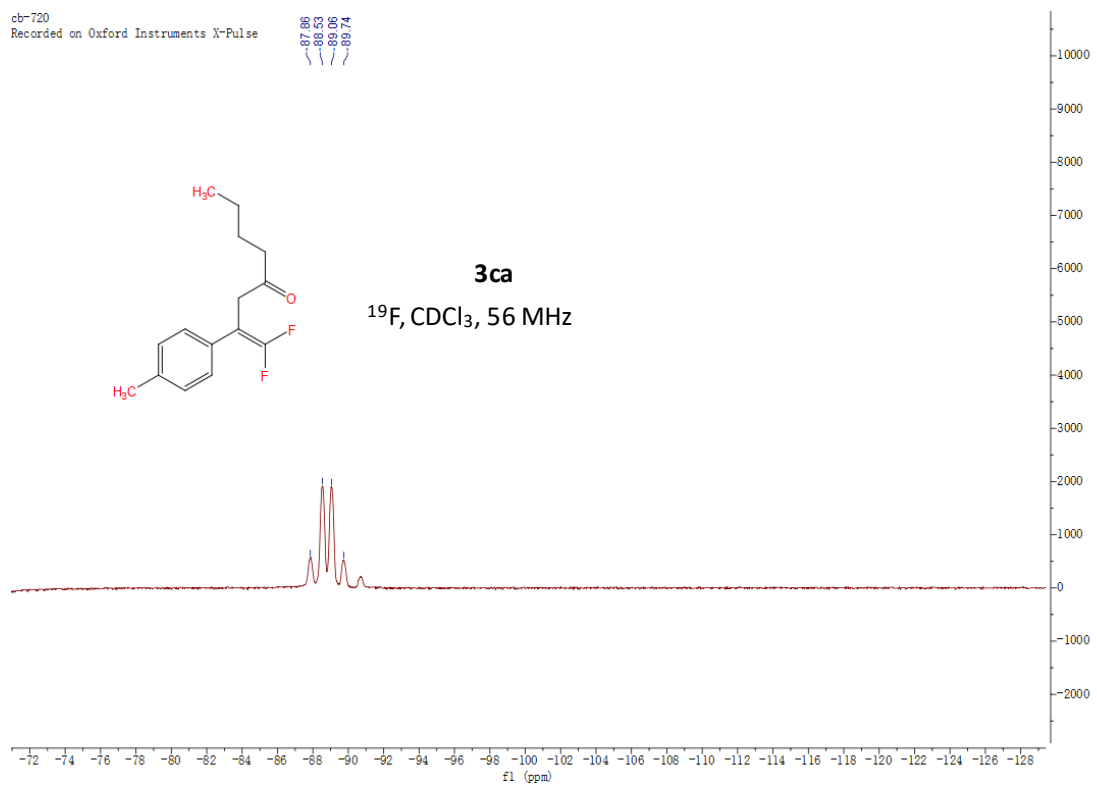

cb-721.10.fid

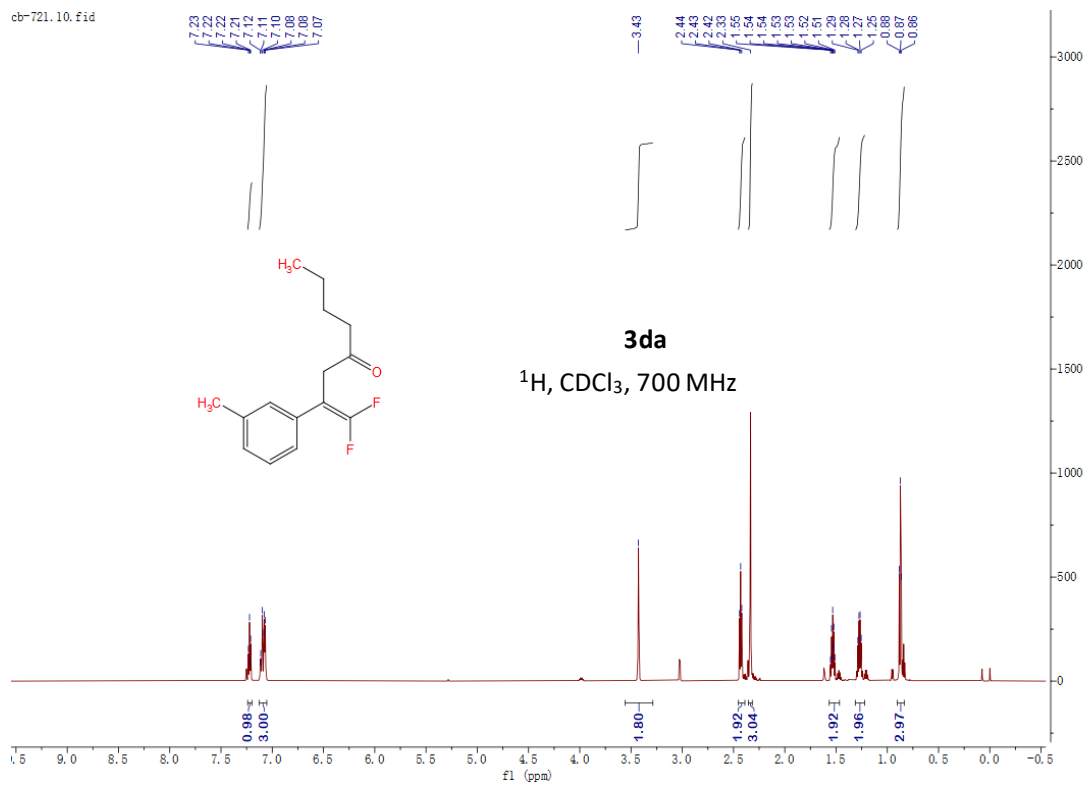

cb-721.10.fid

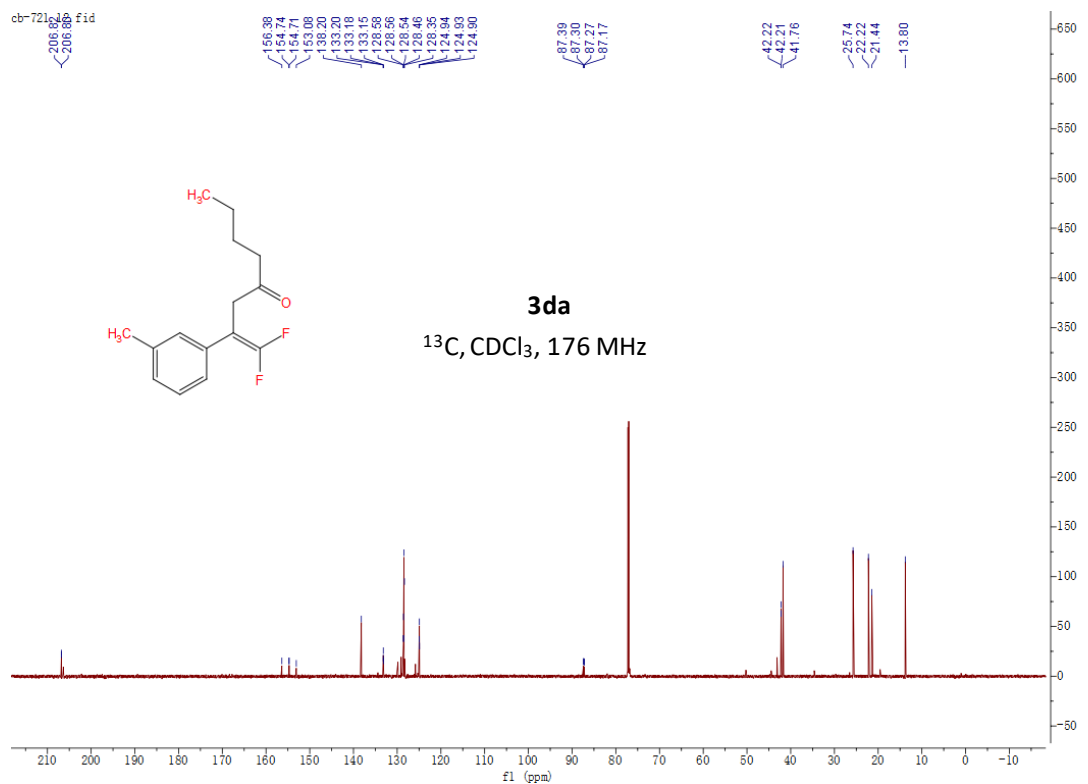

cb-721  
Recorded on Oxford Instruments X-Pulse

87.55  
86.22  
86.79  
86.45

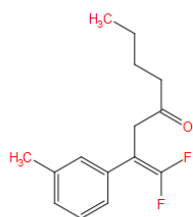

**3da**  
<sup>19</sup>F, CDCl<sub>3</sub>, 56 MHz

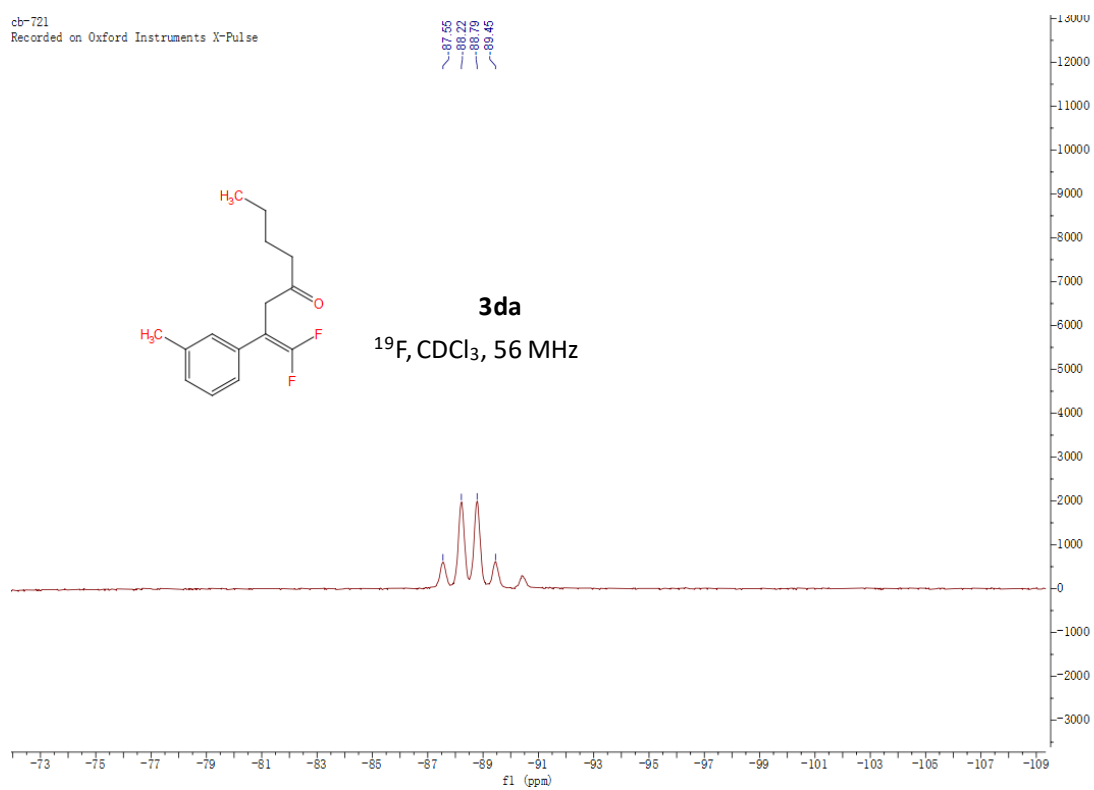

CB-726.10.fid

7.39  
7.38  
7.29  
7.28  
7.24

3.46

2.49  
2.47  
2.46

1.34  
1.33  
1.31  
0.91  
0.89  
0.88

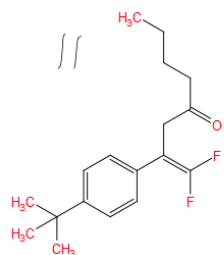

**3ea**  
<sup>1</sup>H, CDCl<sub>3</sub>, 700 MHz

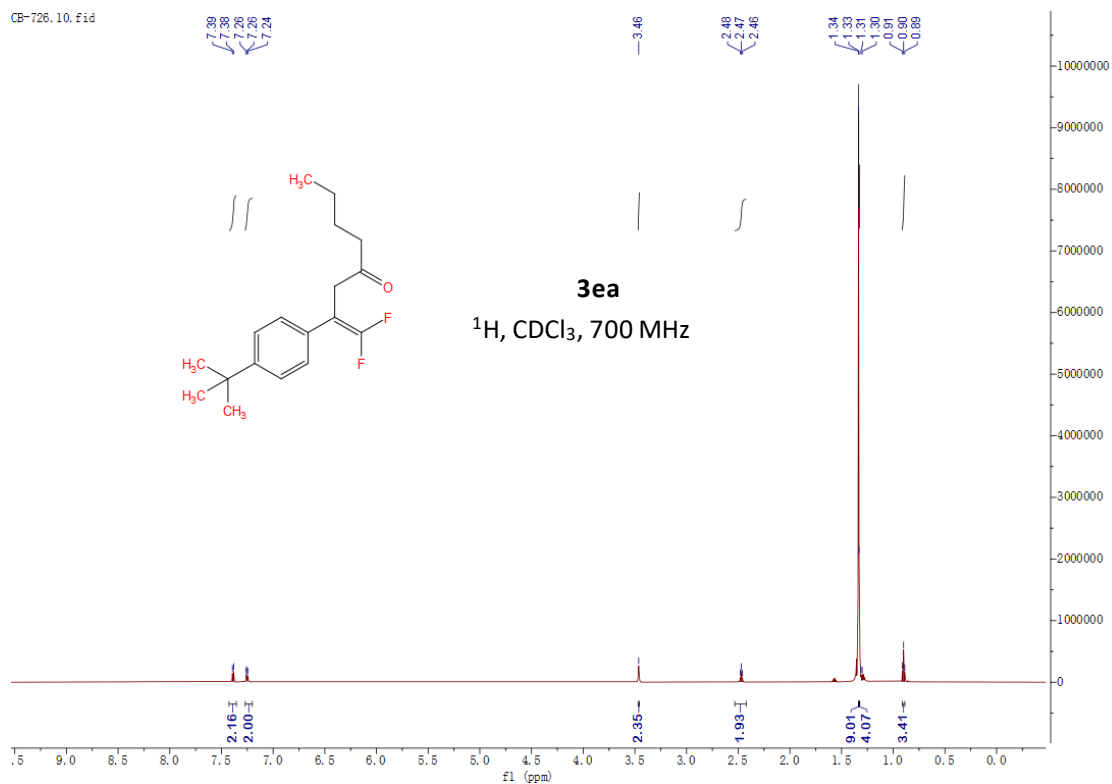

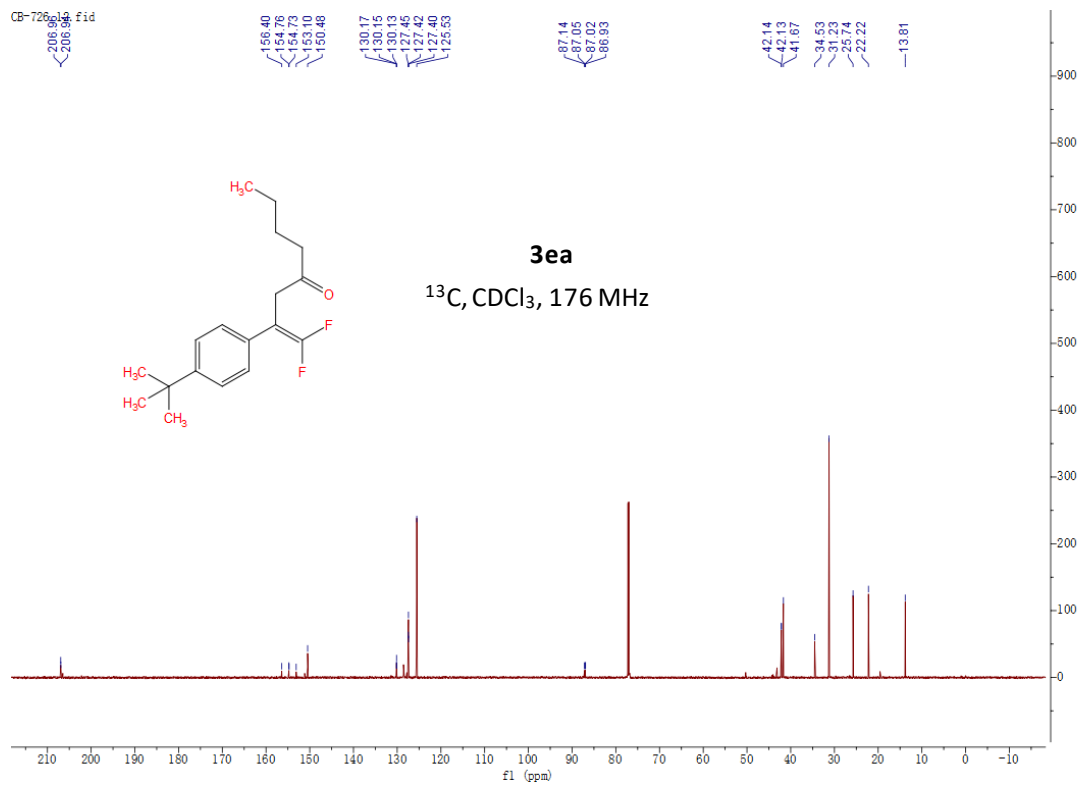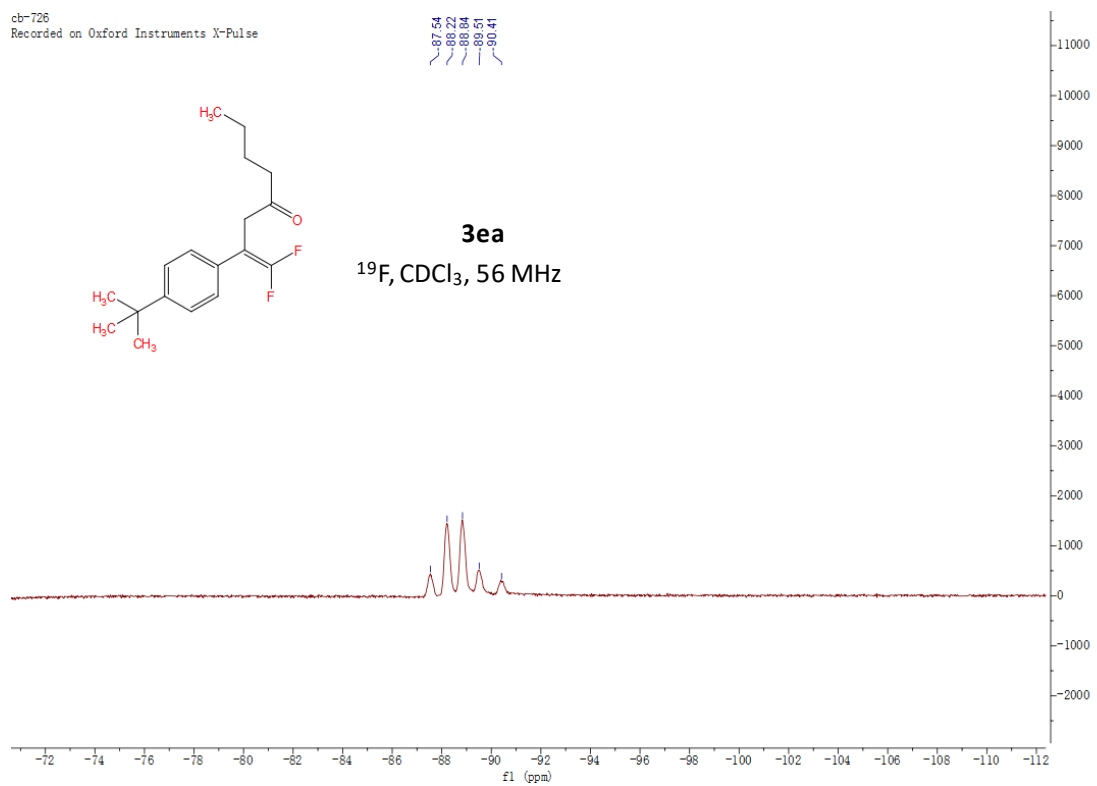

CB-724.11.fid

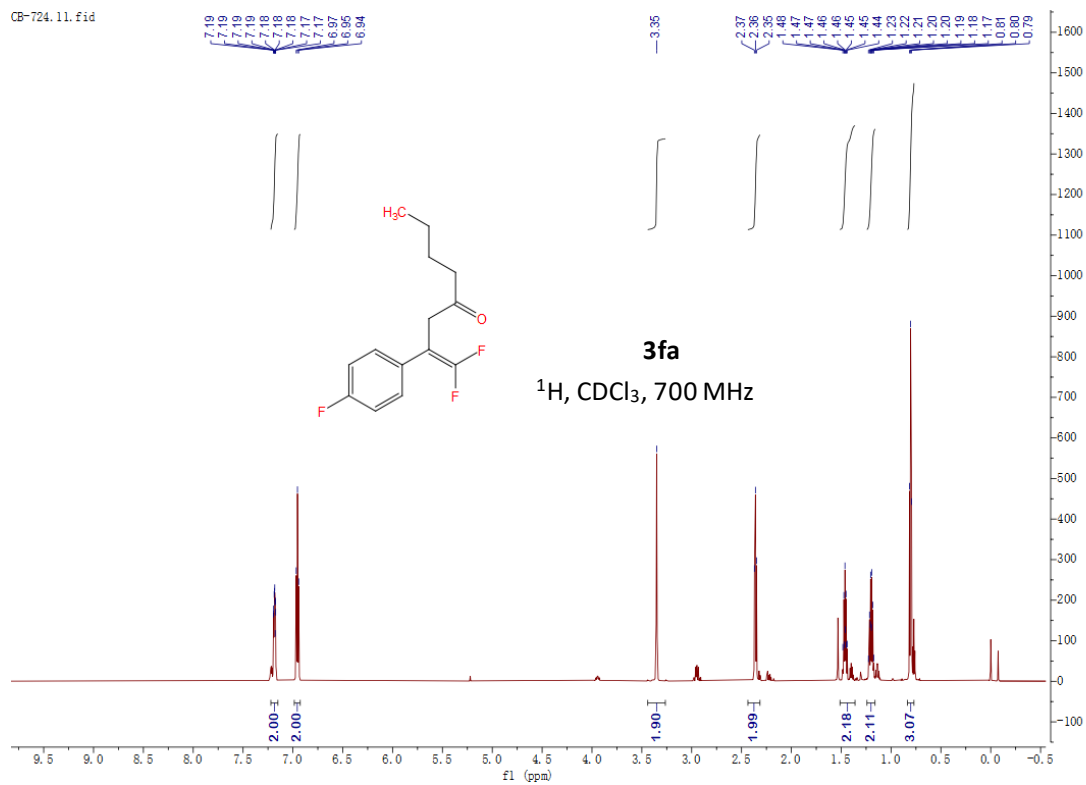

CB-724.11.fid

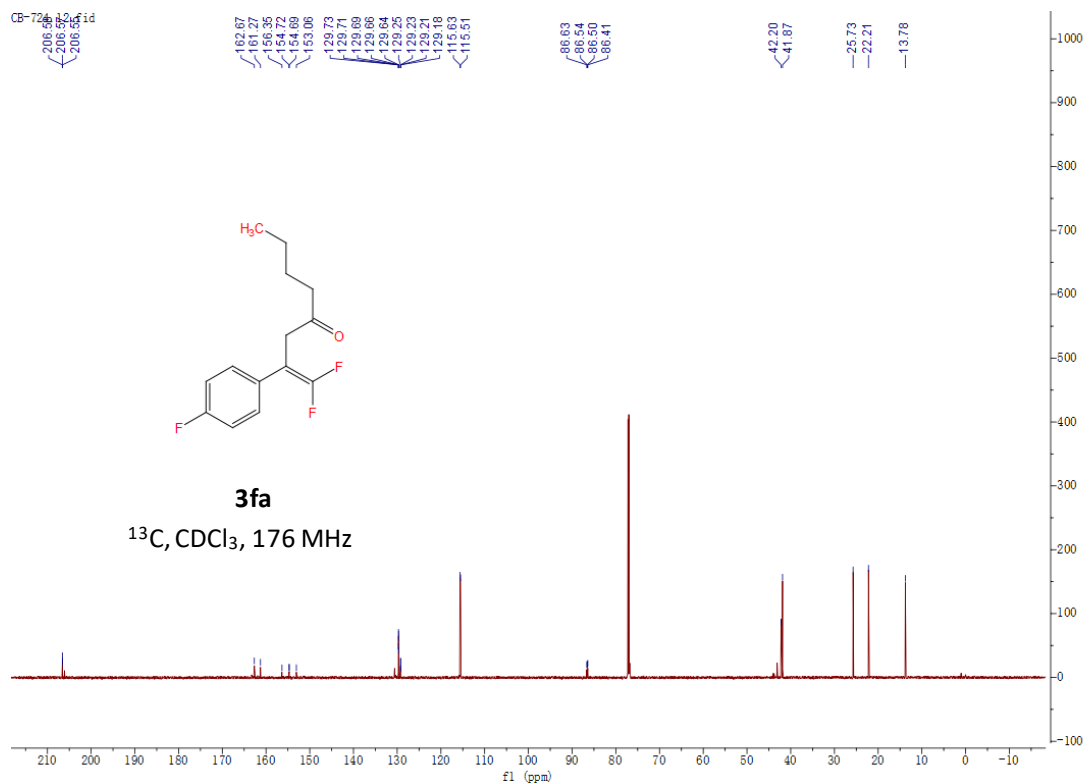

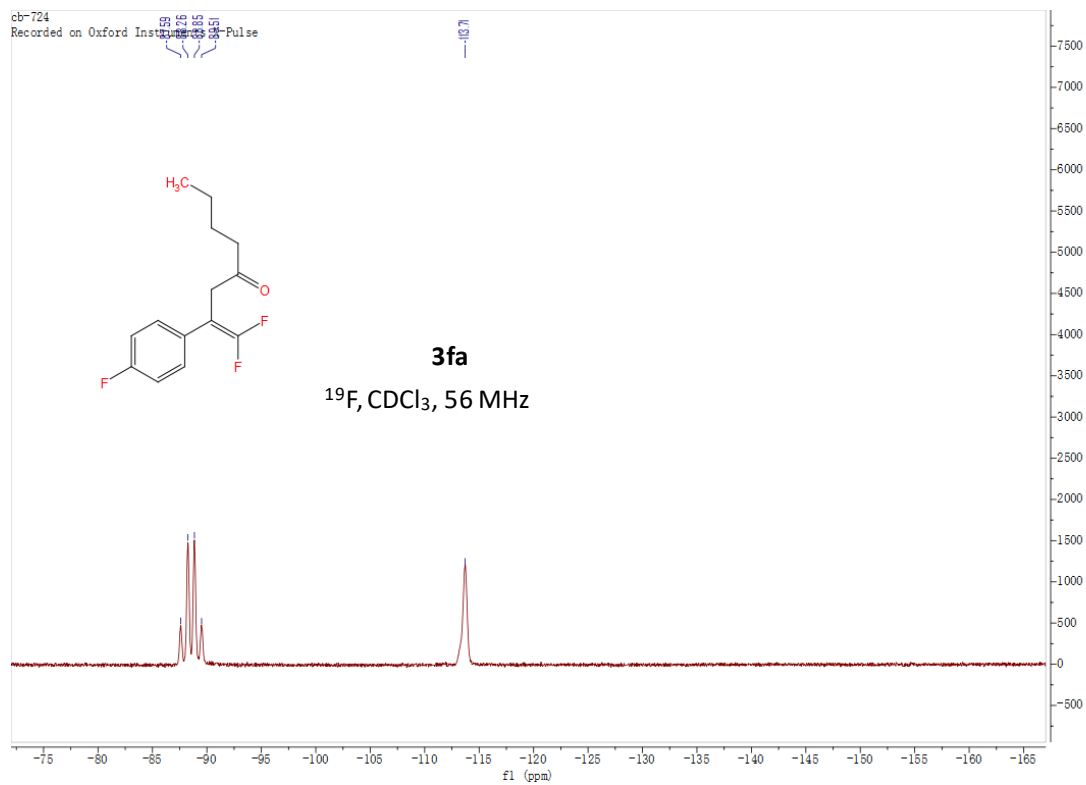

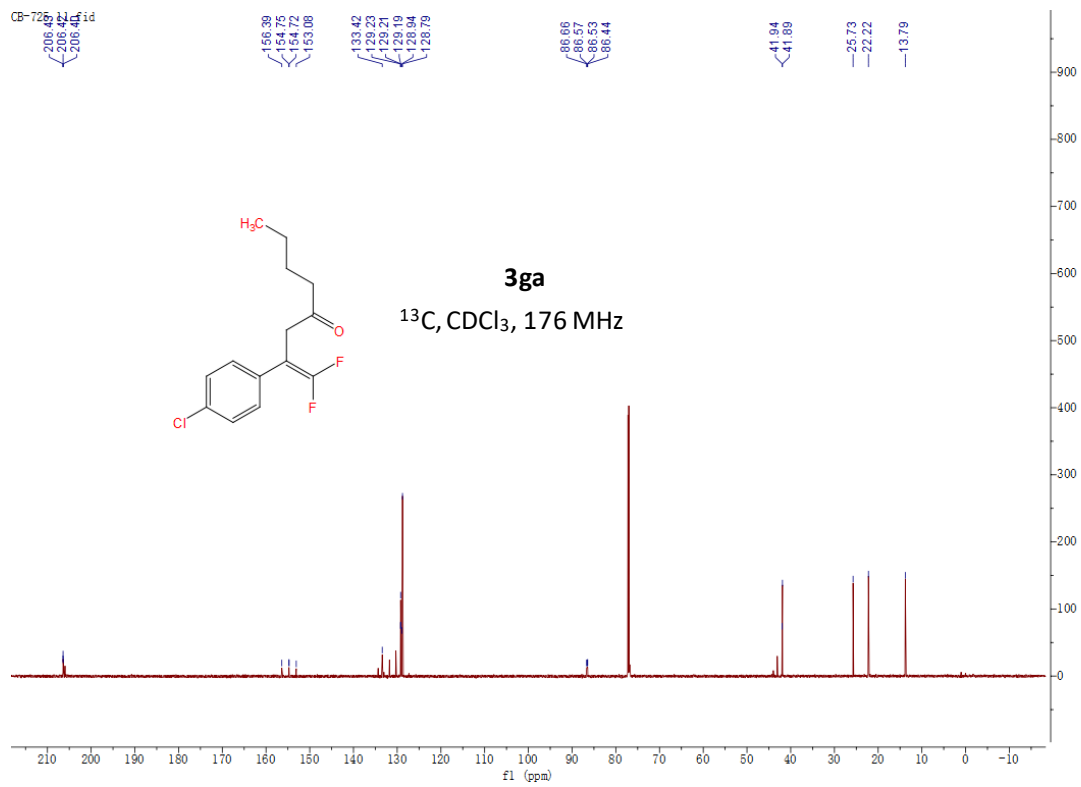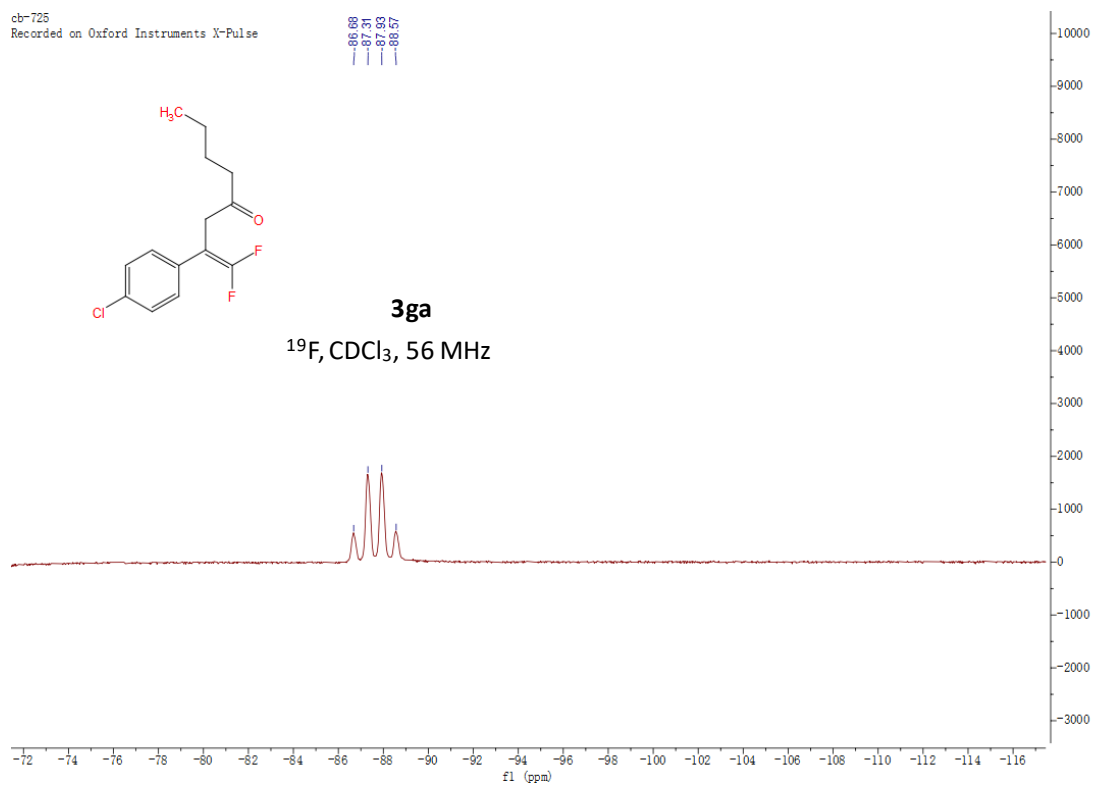

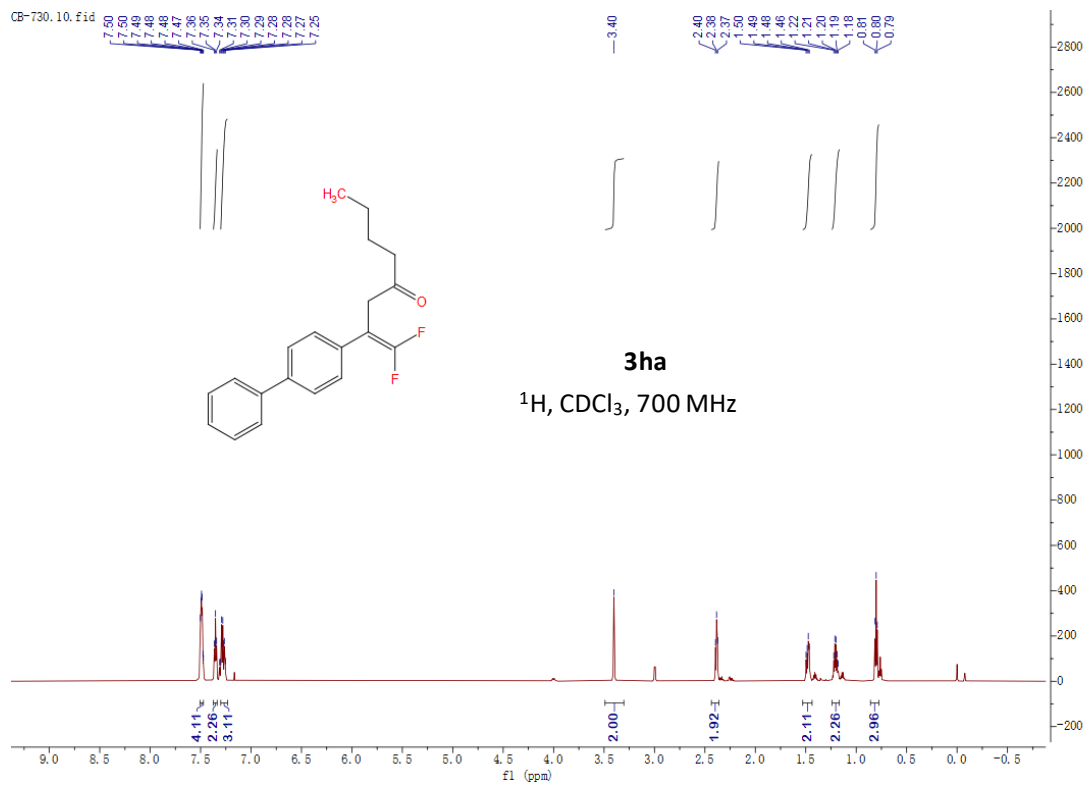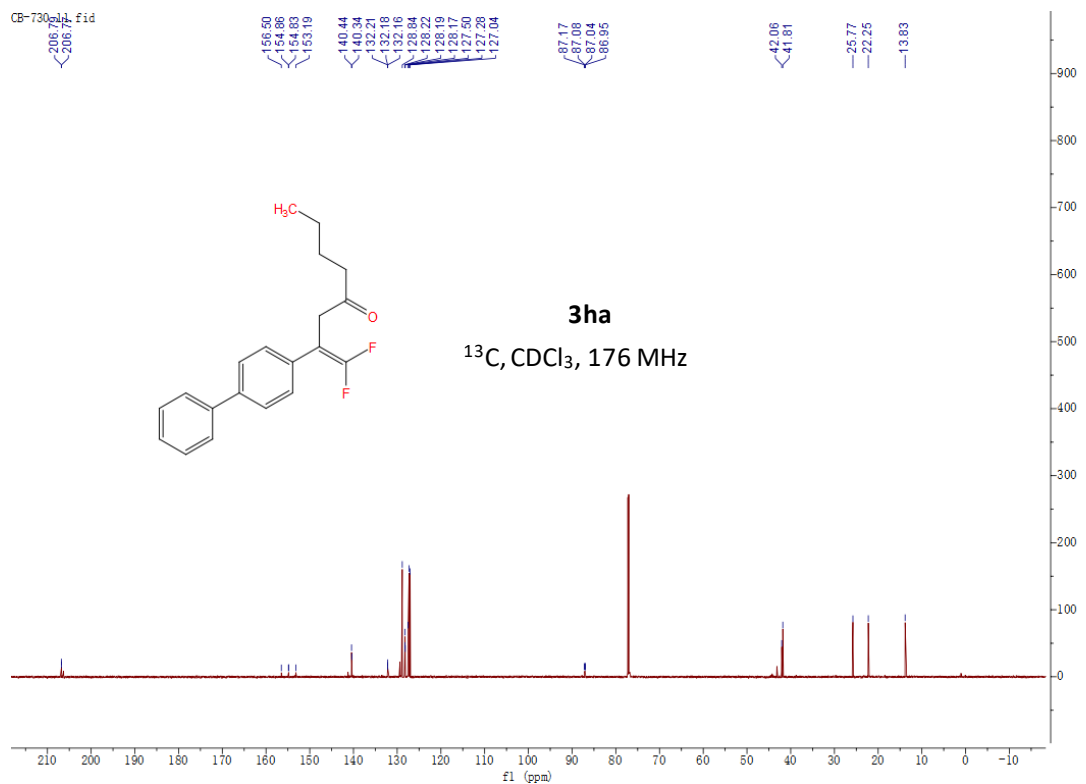



cb-730  
Recorded on Oxford Instruments X-Pulse

86.78  
87.43  
88.09  
88.73

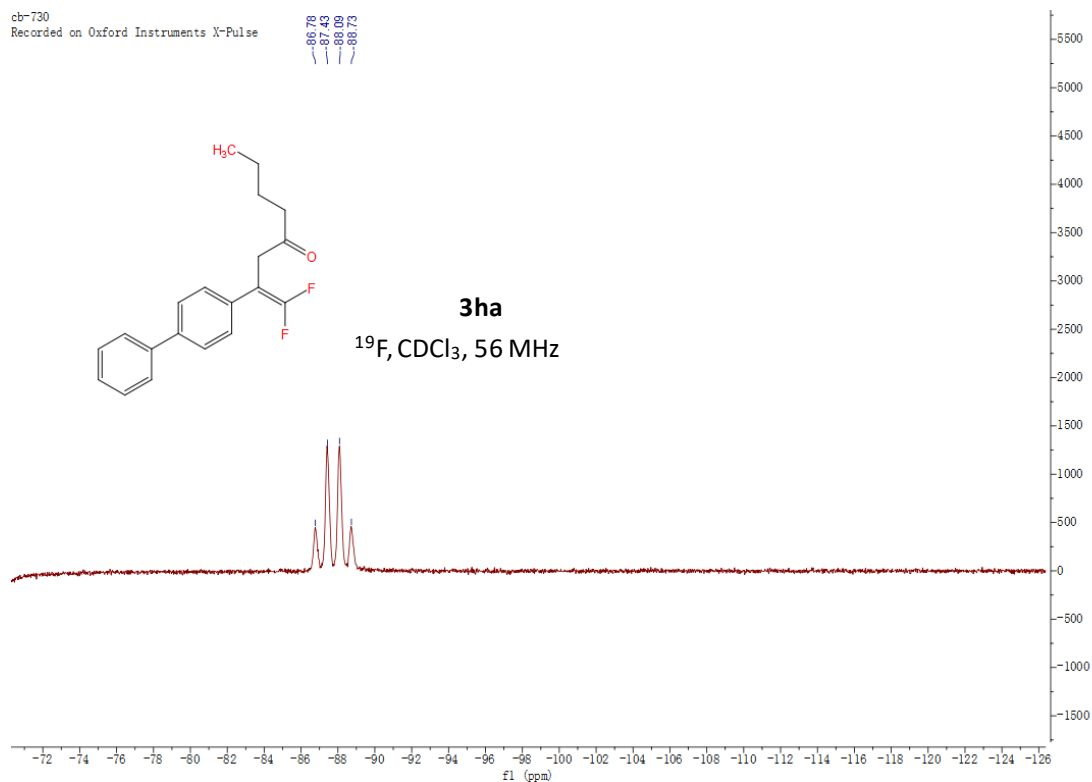

cb-695.20.fid

7.15  
7.14  
6.81  
6.79

3.72  
3.34

2.36  
2.35  
2.34  
1.47  
1.46  
1.44  
1.43  
1.21  
1.20  
1.19  
1.18  
0.98  
0.79

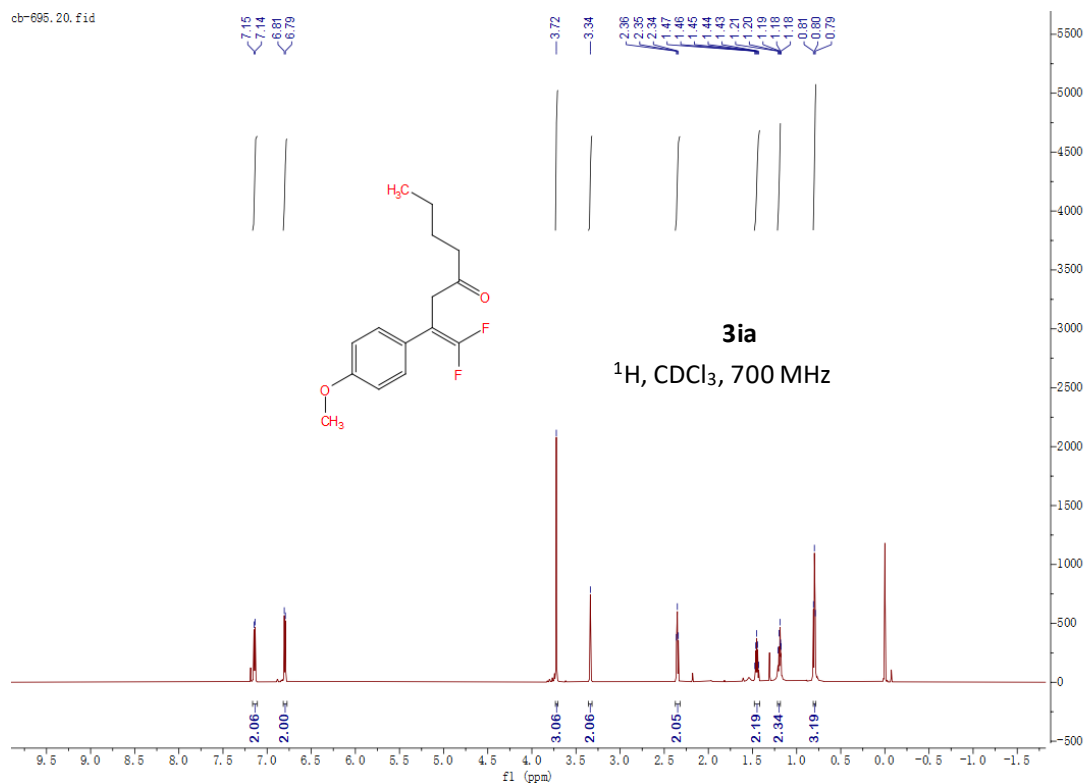

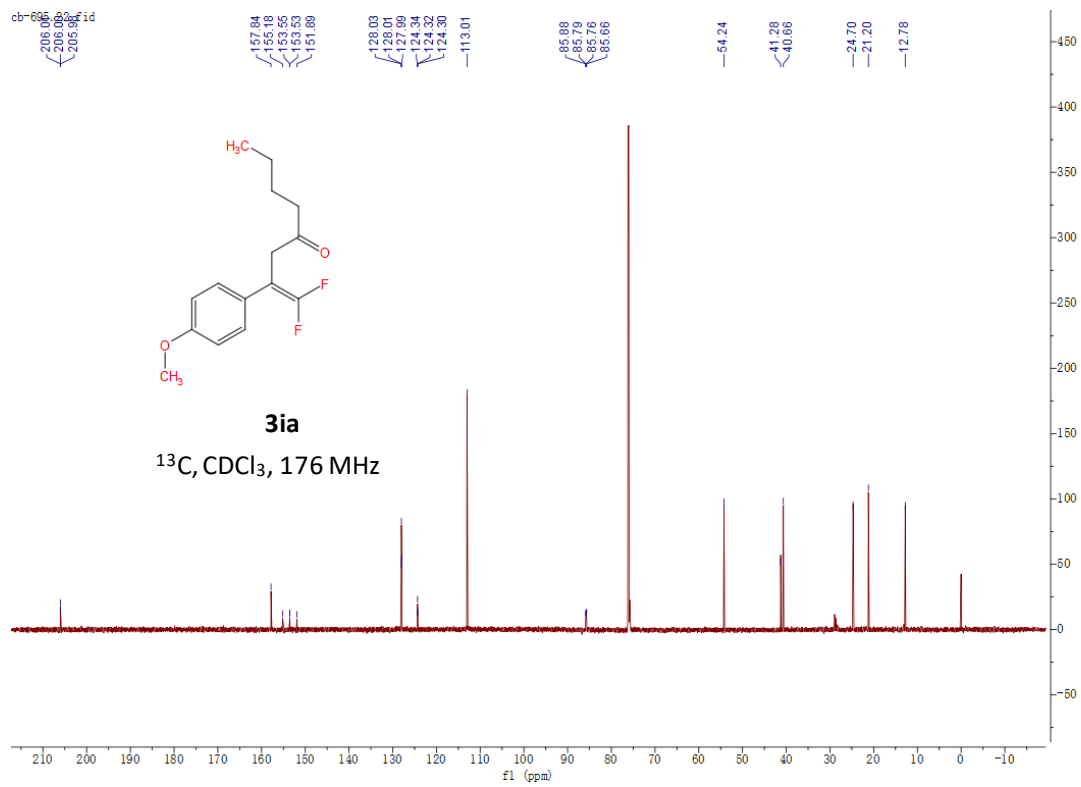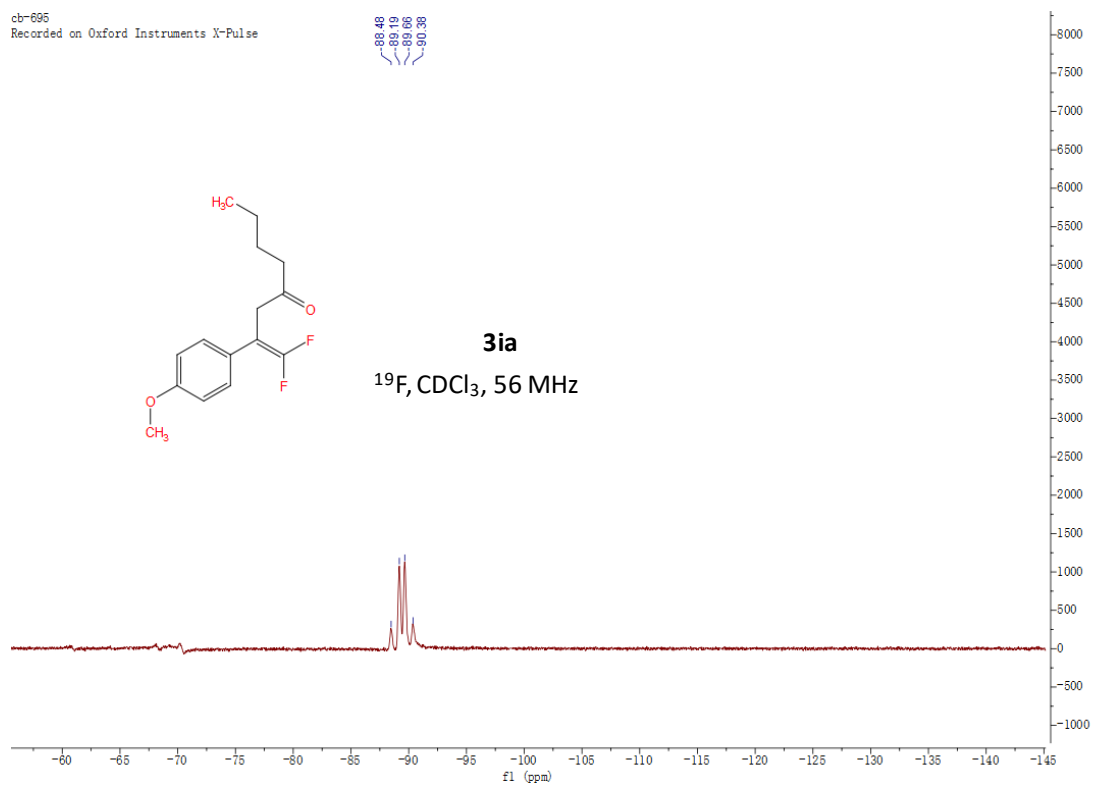

CB-728.10.fid

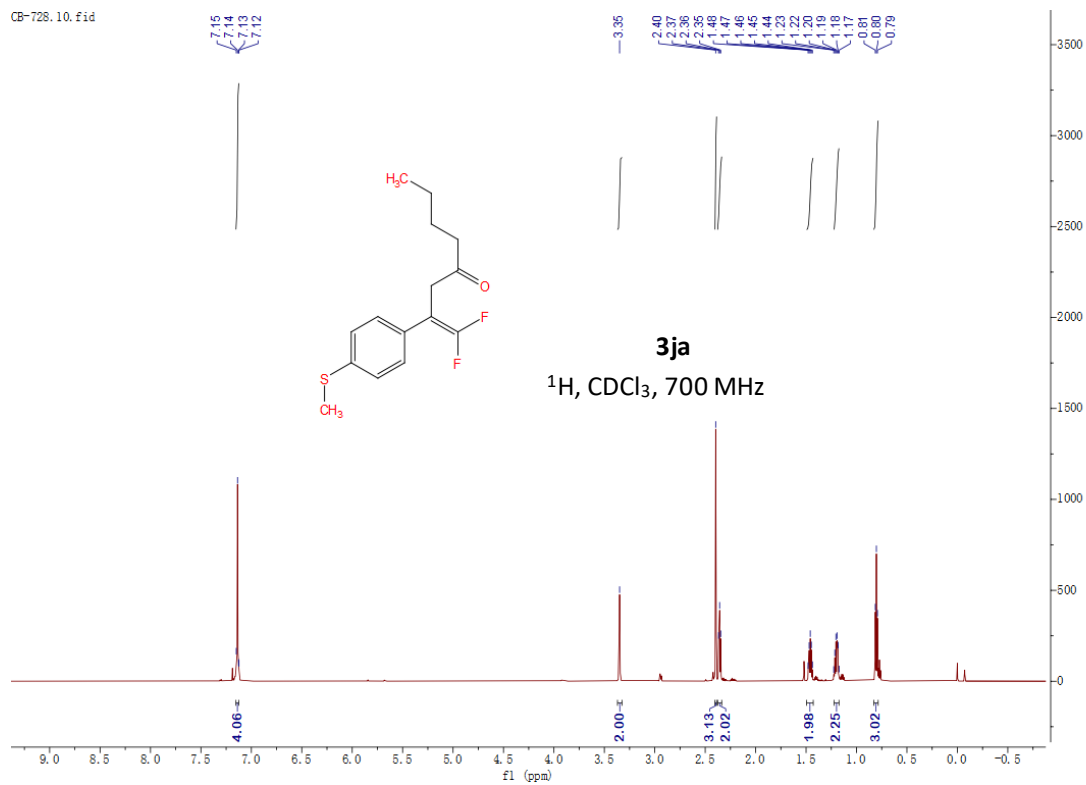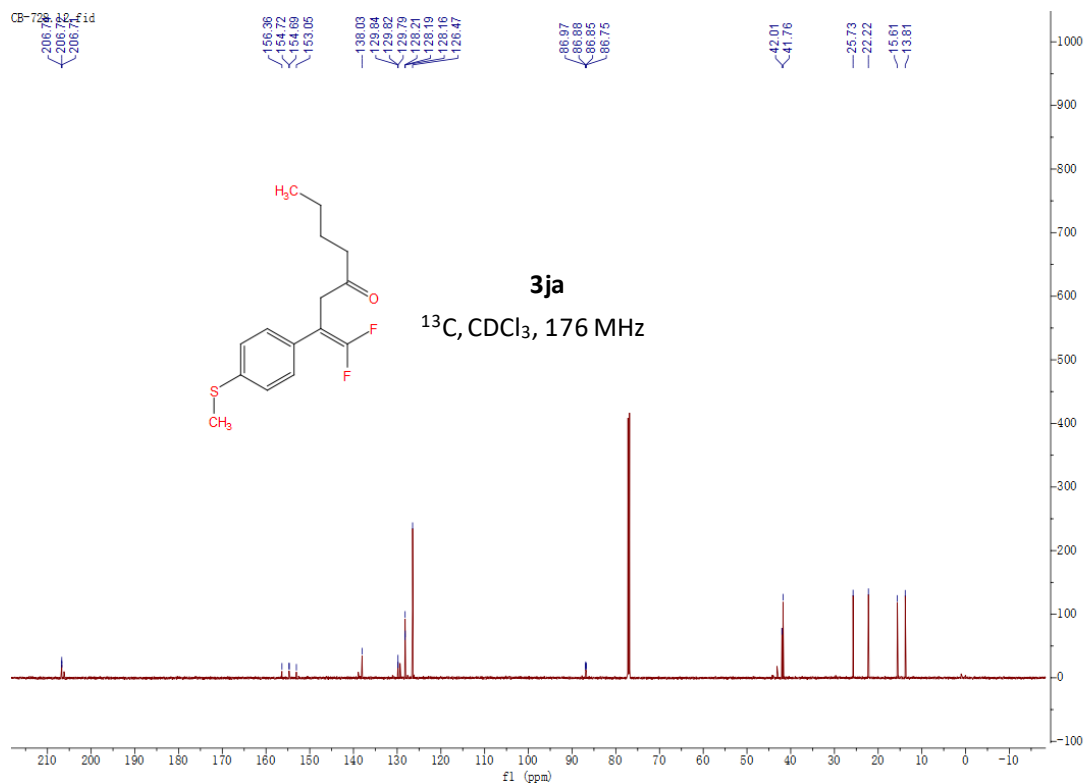

cb-728  
Recorded on Oxford Instruments X-Pulse

87.03  
87.69  
88.22  
88.88

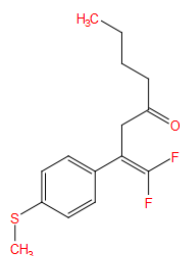

**3ja**  
 $^{19}\text{F}$ ,  $\text{CDCl}_3$ , 56 MHz

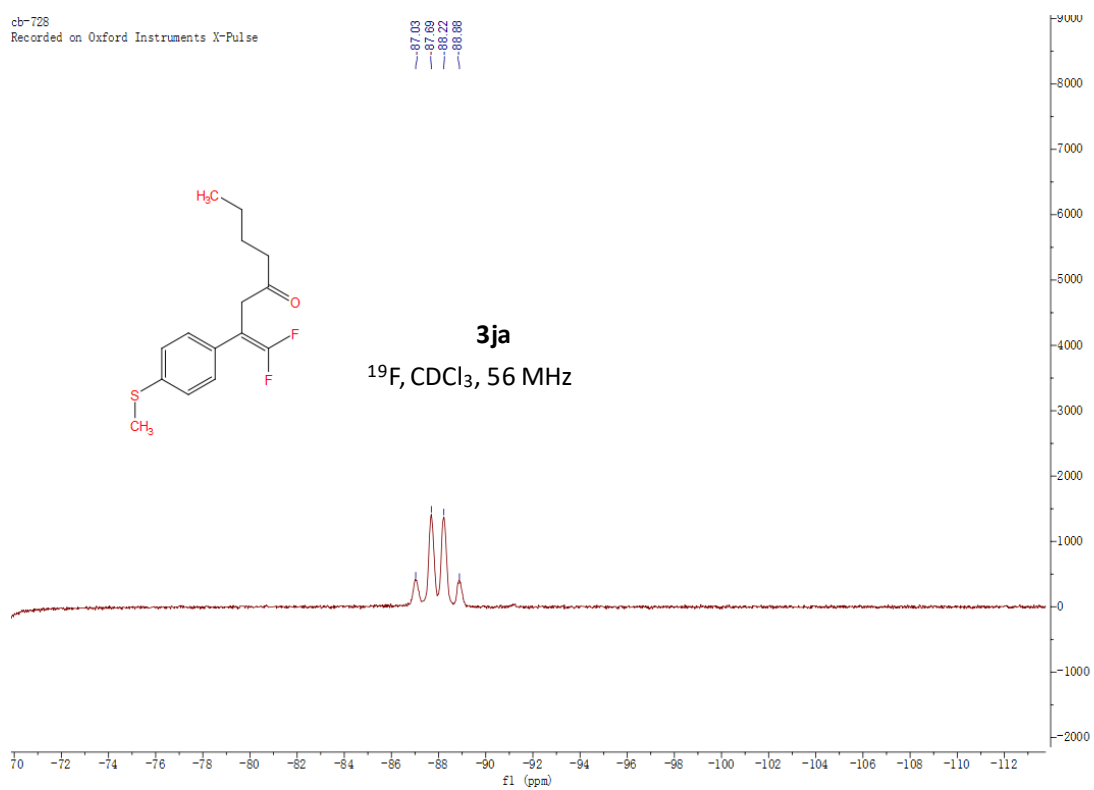

CB-740.10.fid

7.26  
7.12  
7.11

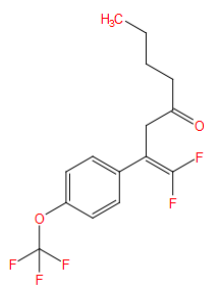

**3ka**  
 $^1\text{H}$ ,  $\text{CDCl}_3$ , 700 MHz

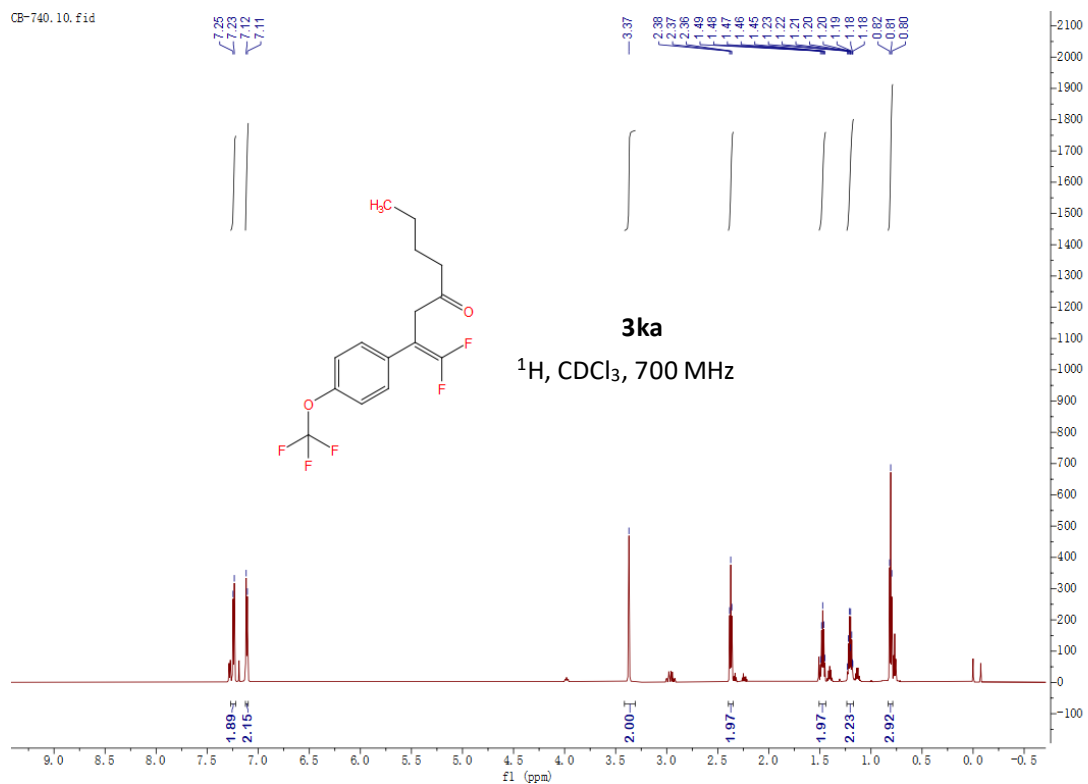

3.37  
2.38  
2.37  
2.36  
1.49  
1.48  
1.47  
1.46  
1.45  
1.23  
1.22  
1.21  
1.20  
1.19  
1.18  
0.82  
0.81  
0.80

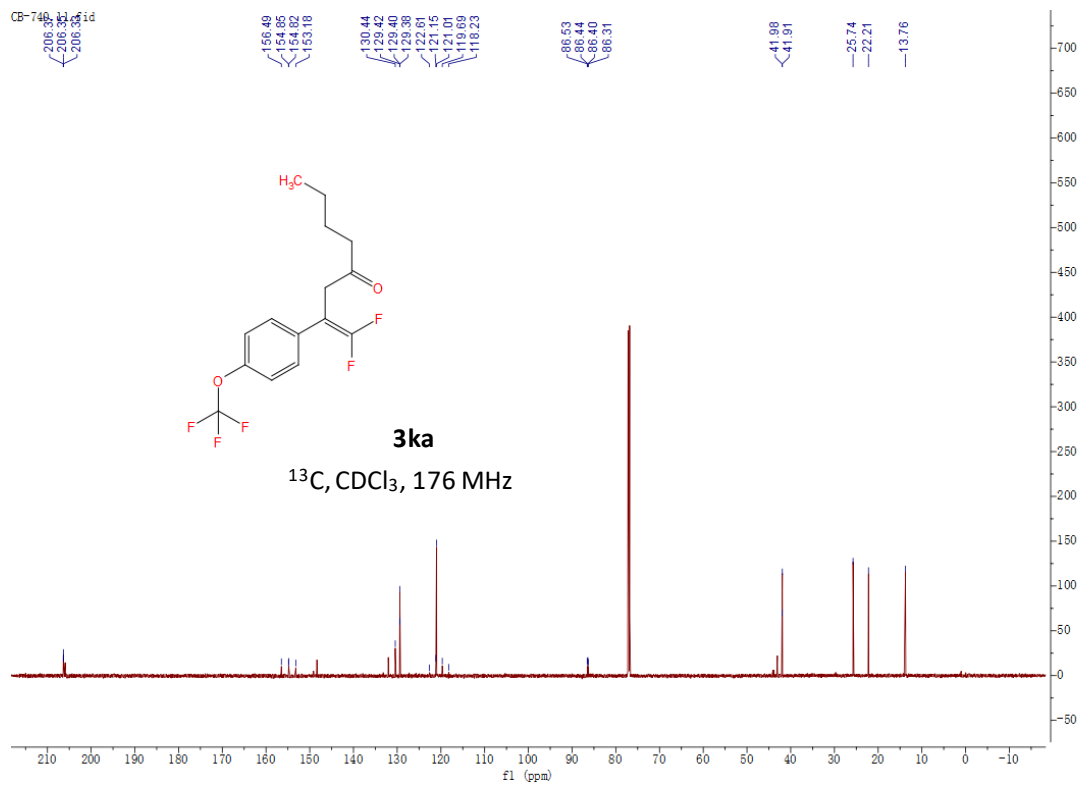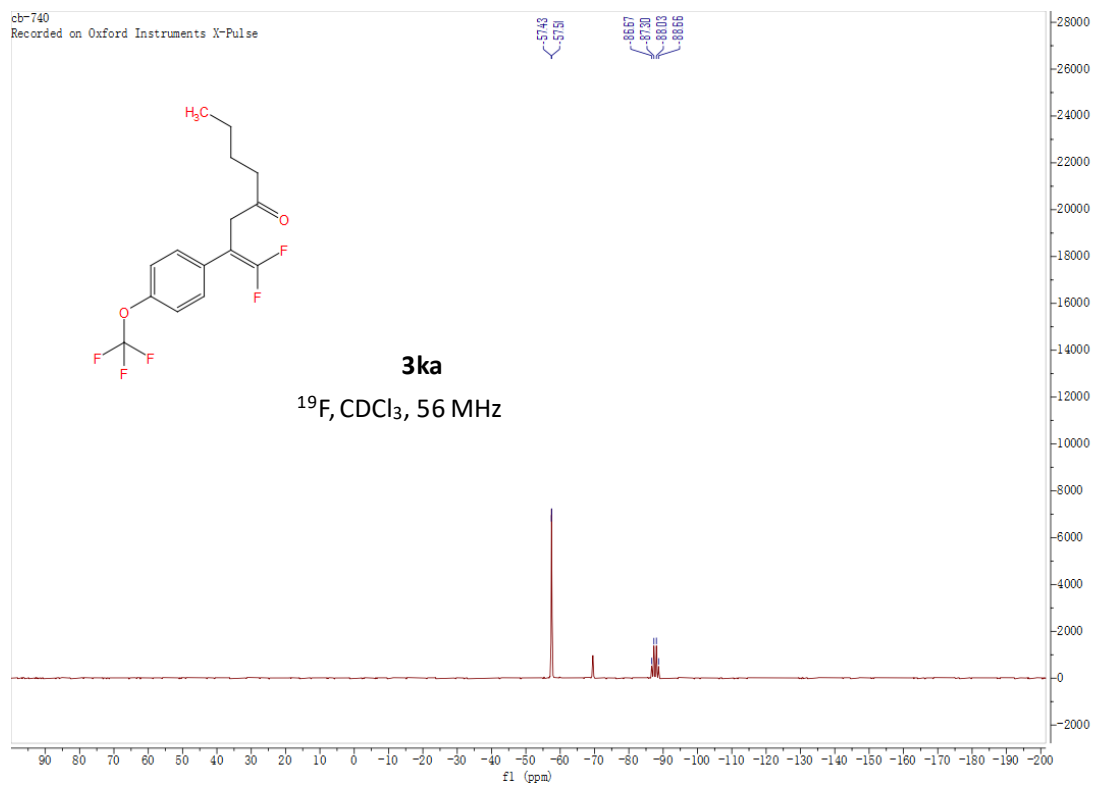

CB-73X.10.fid

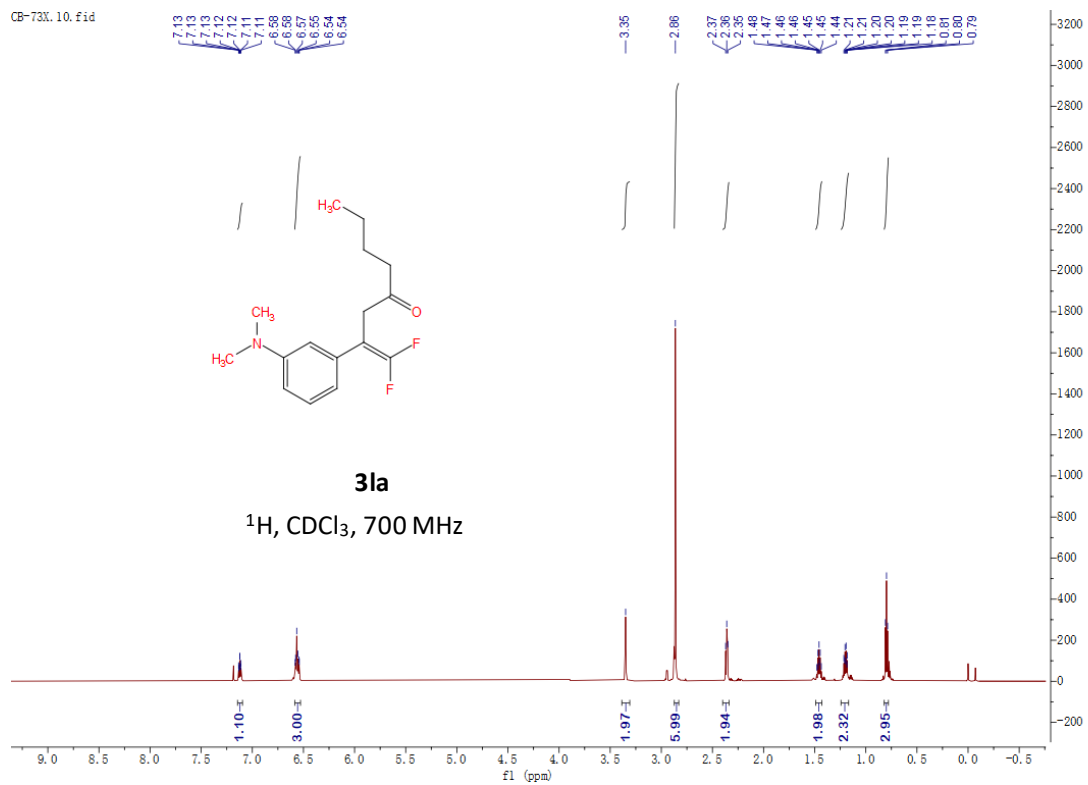

CB-73X.05.fid

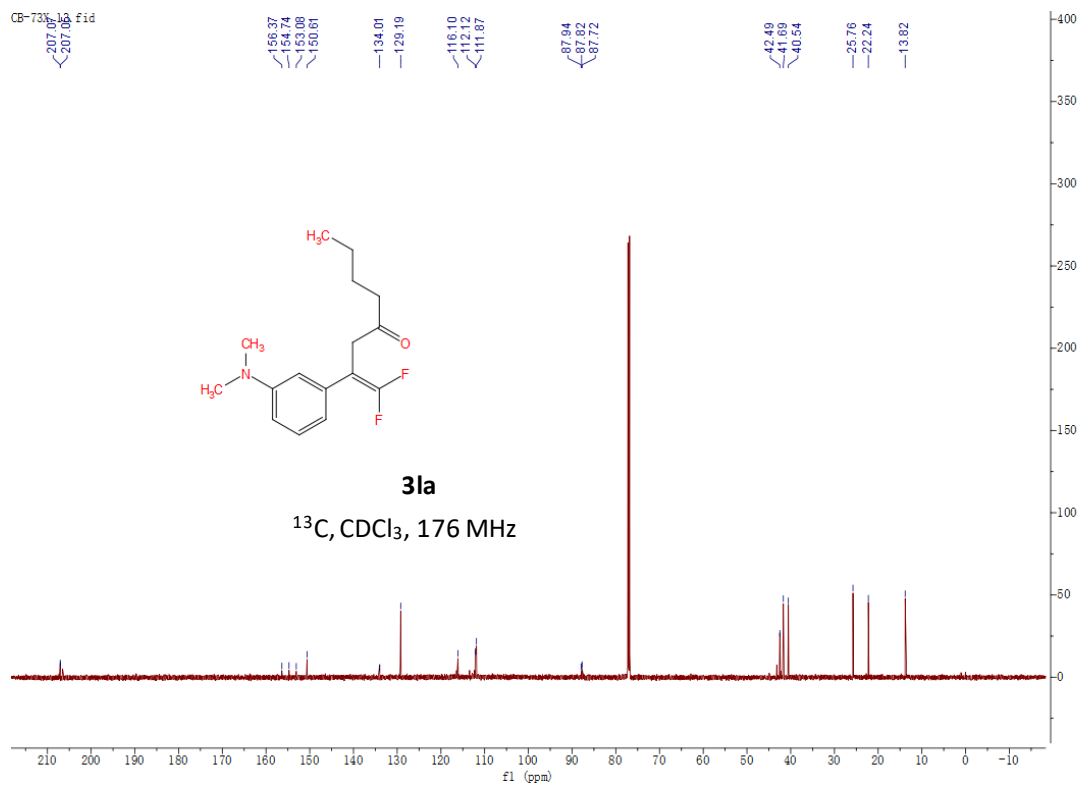

cb-733  
Recorded on Oxford Instruments X-Pulse

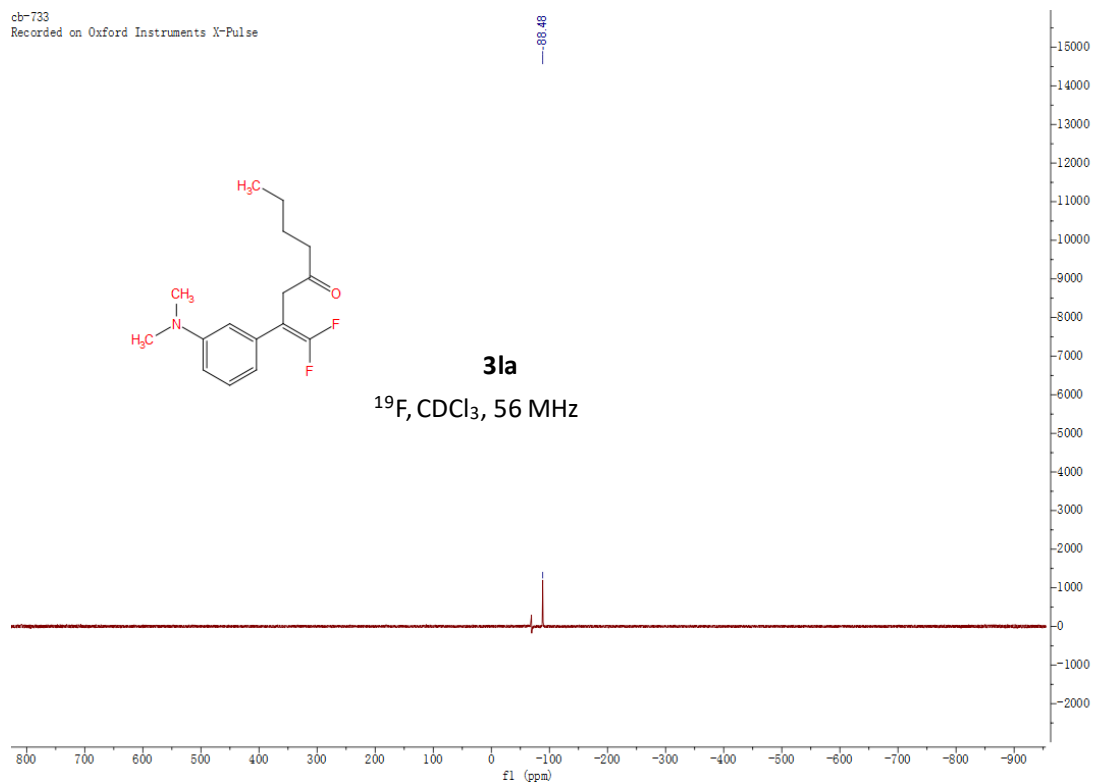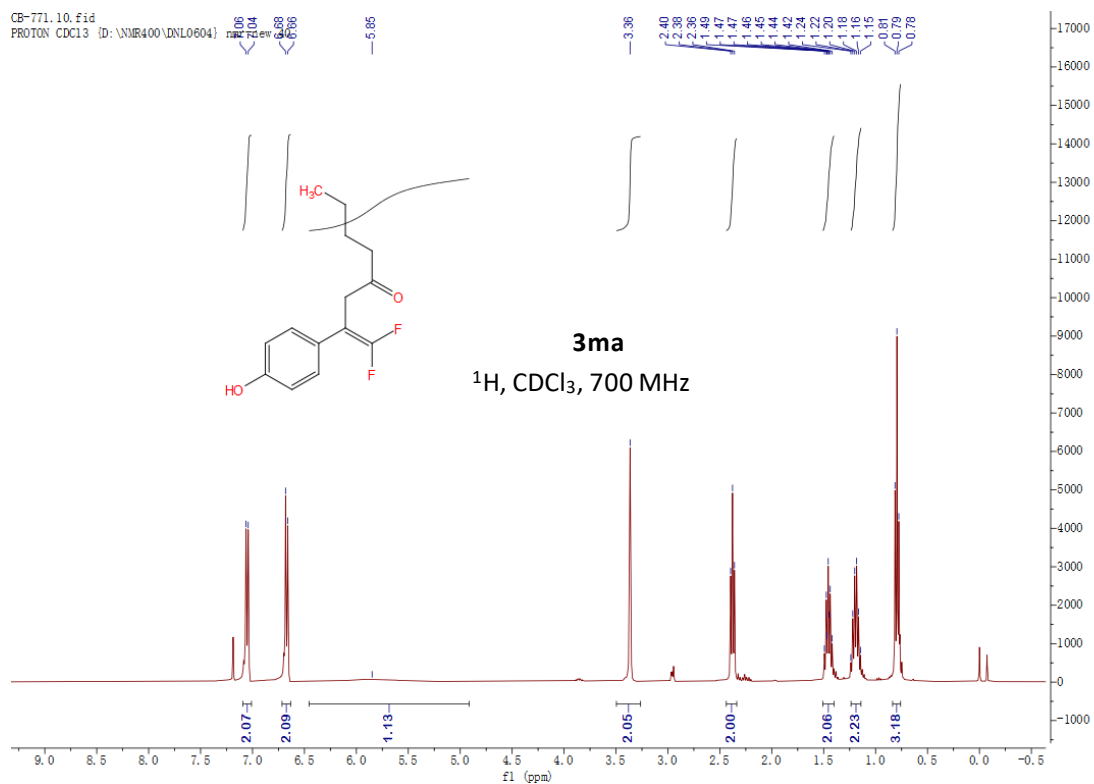

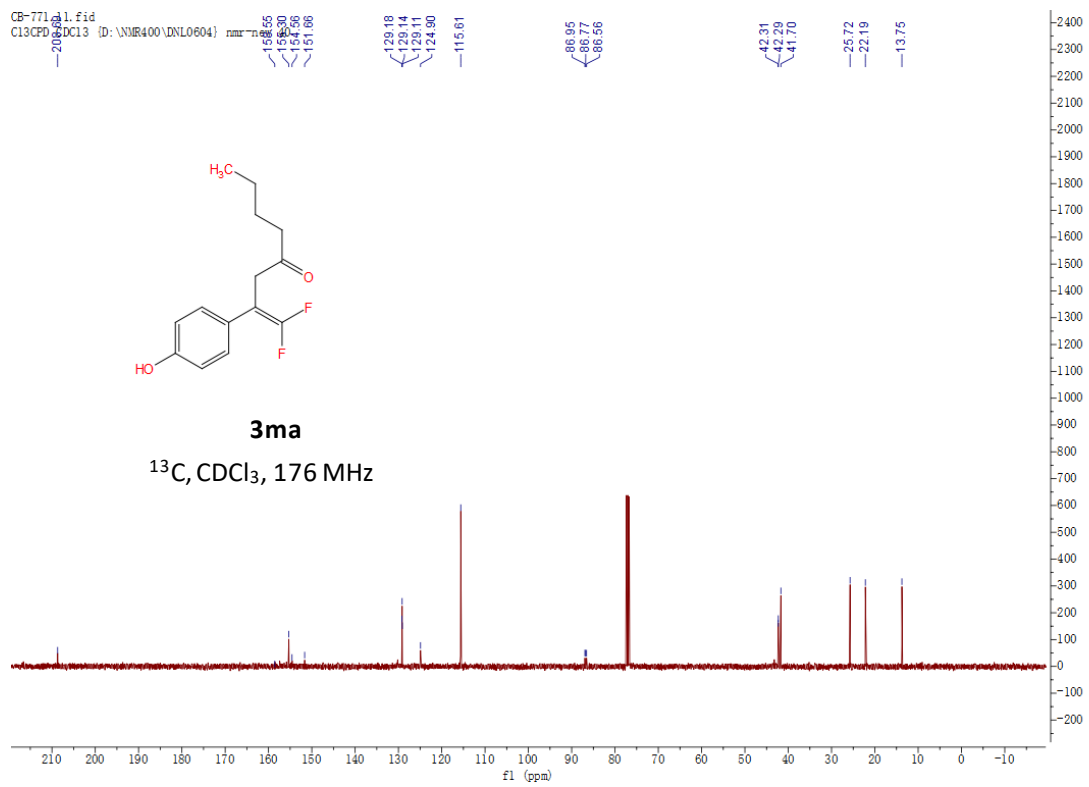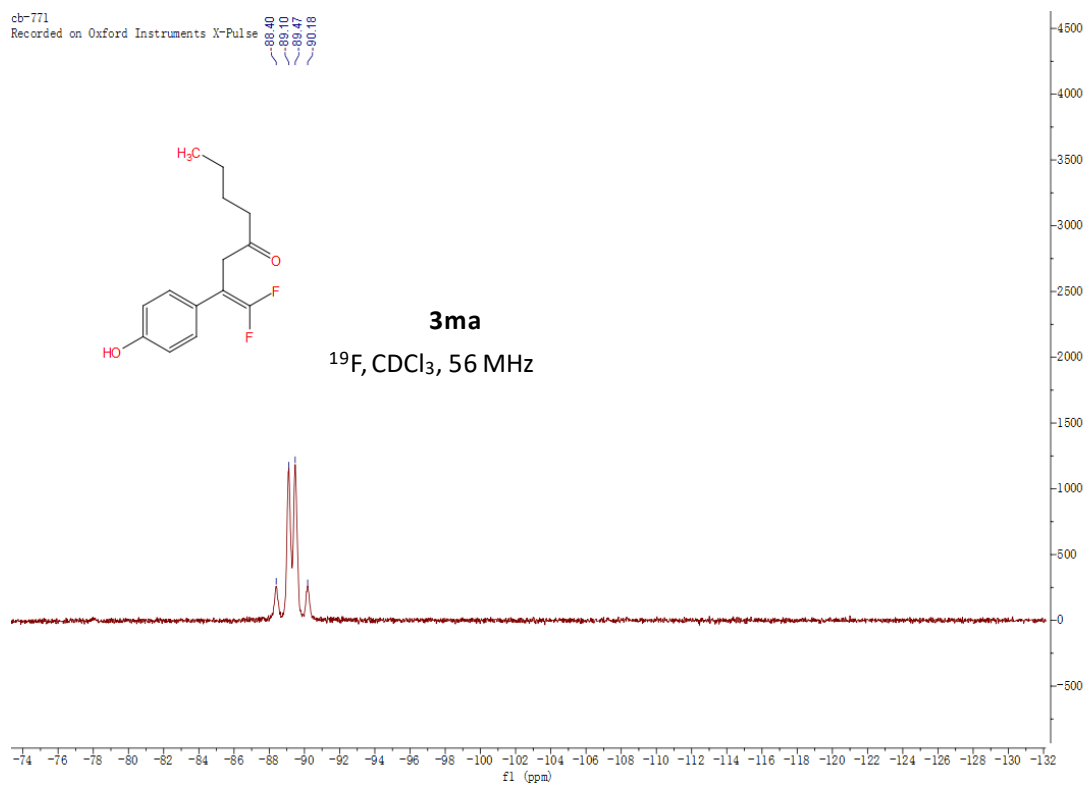



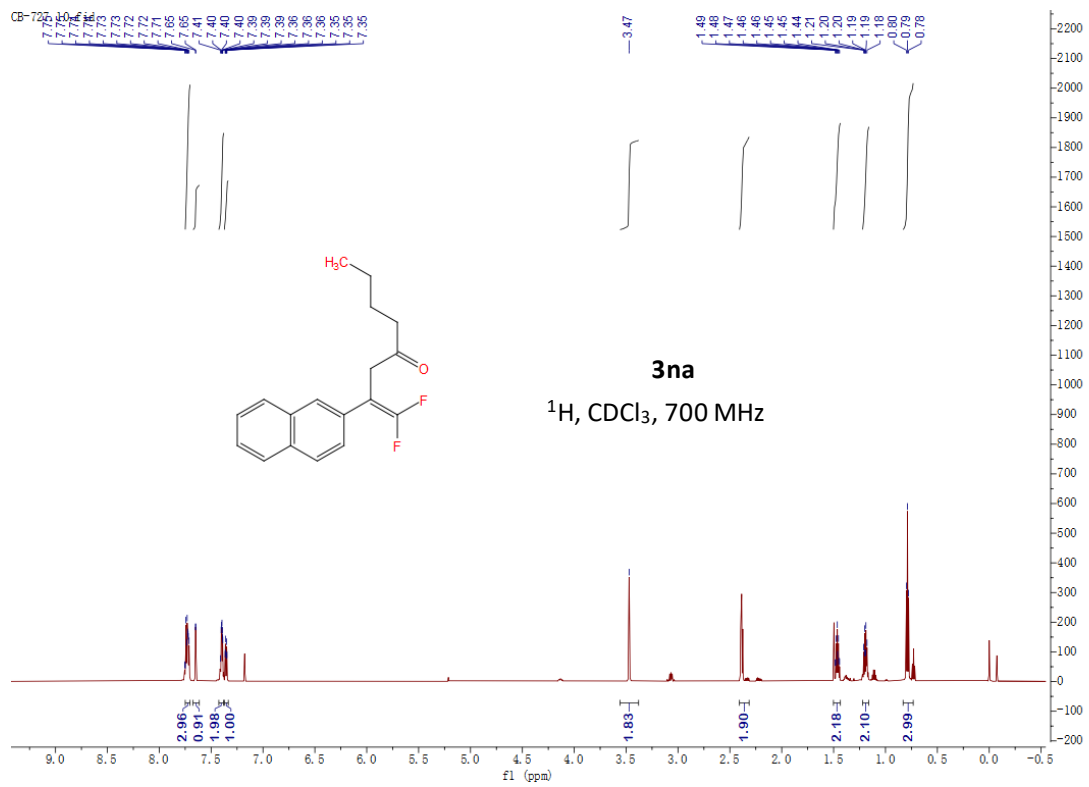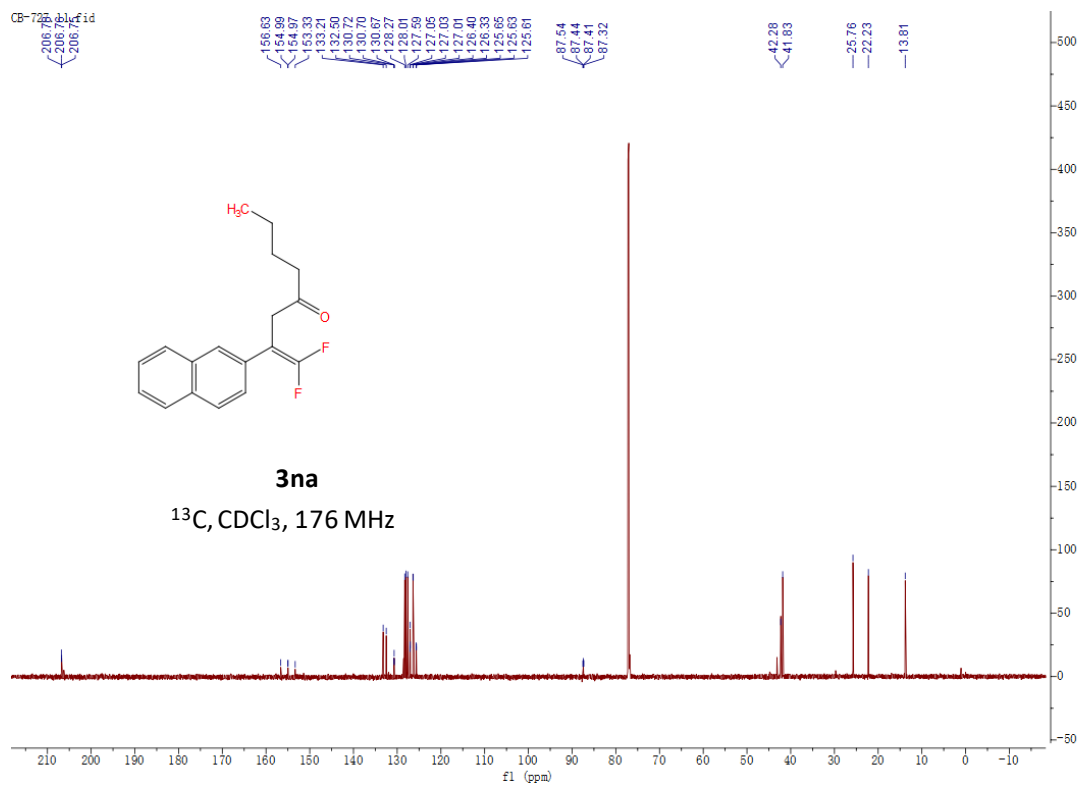

cb-727  
Recorded on Oxford Instruments X-Pulse

86.78  
87.44  
88.26  
88.91

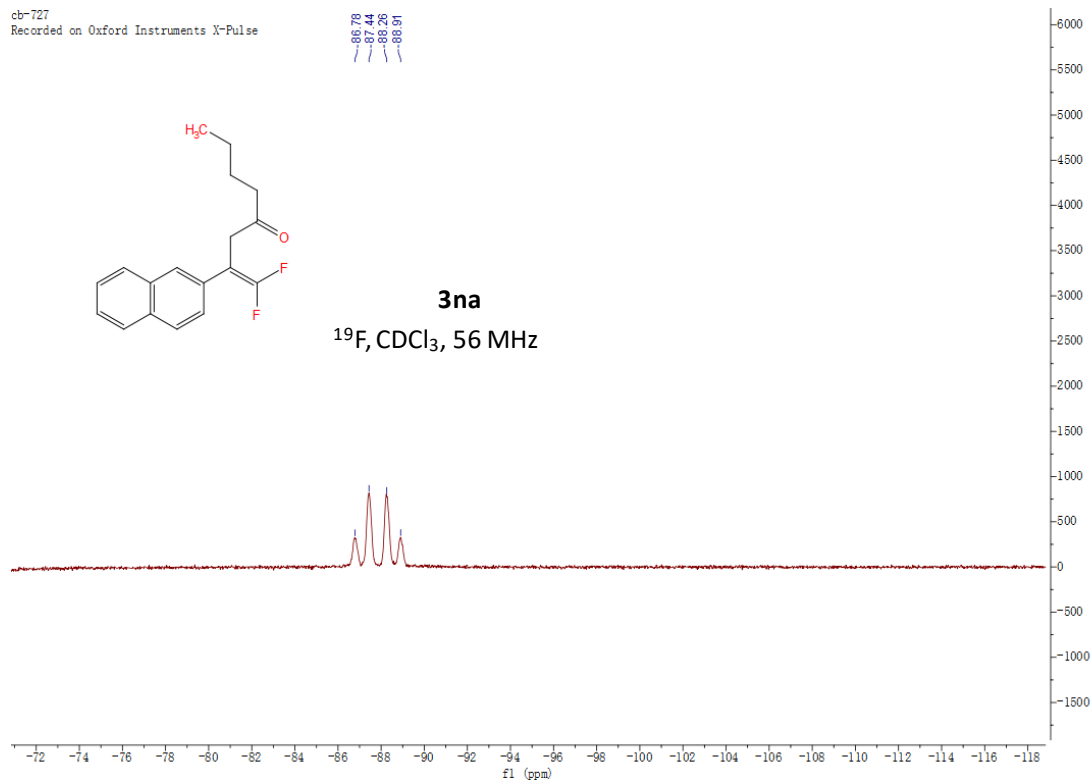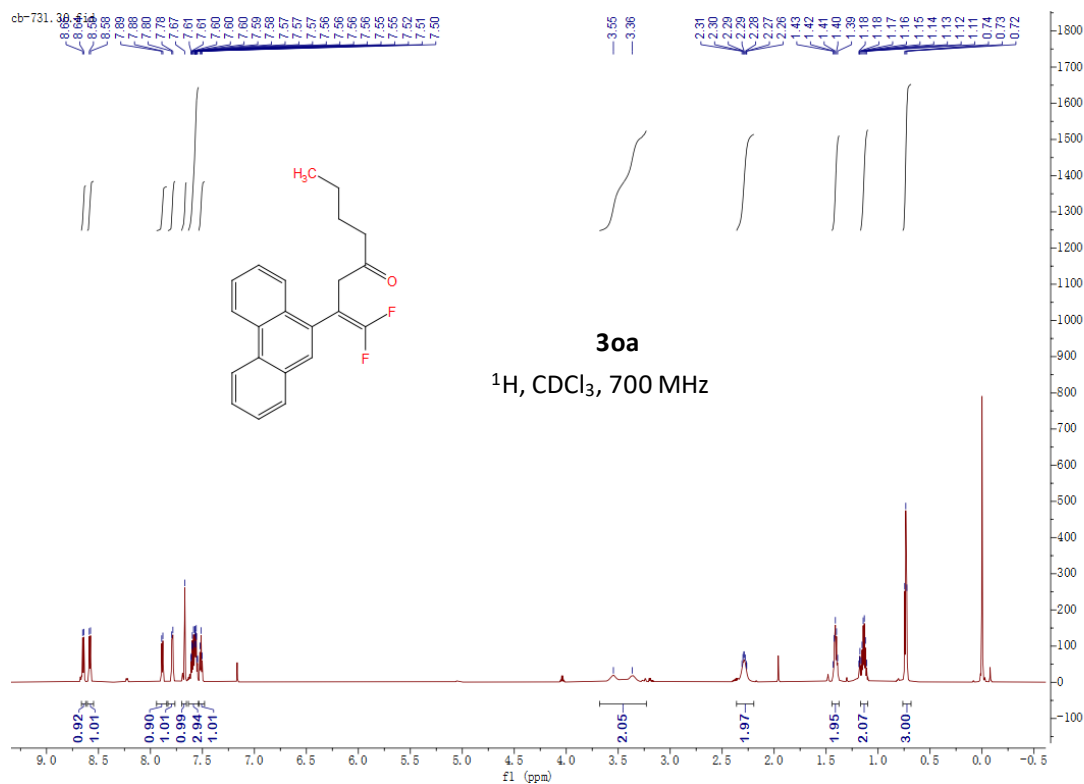

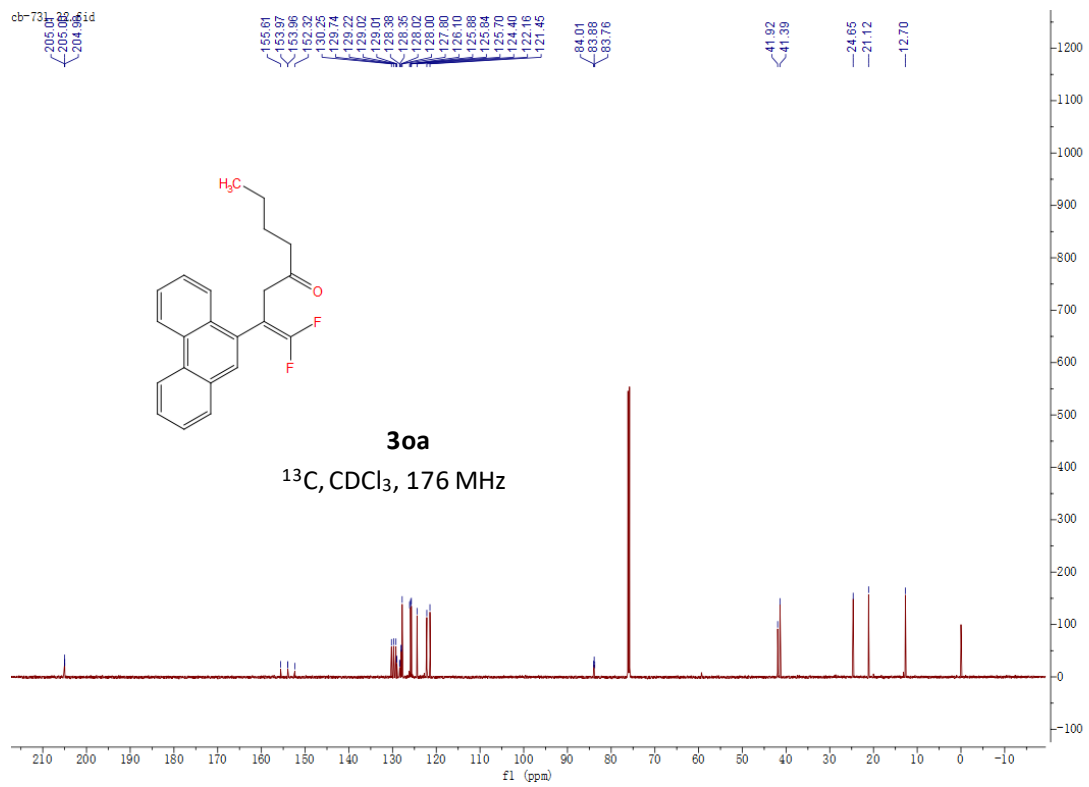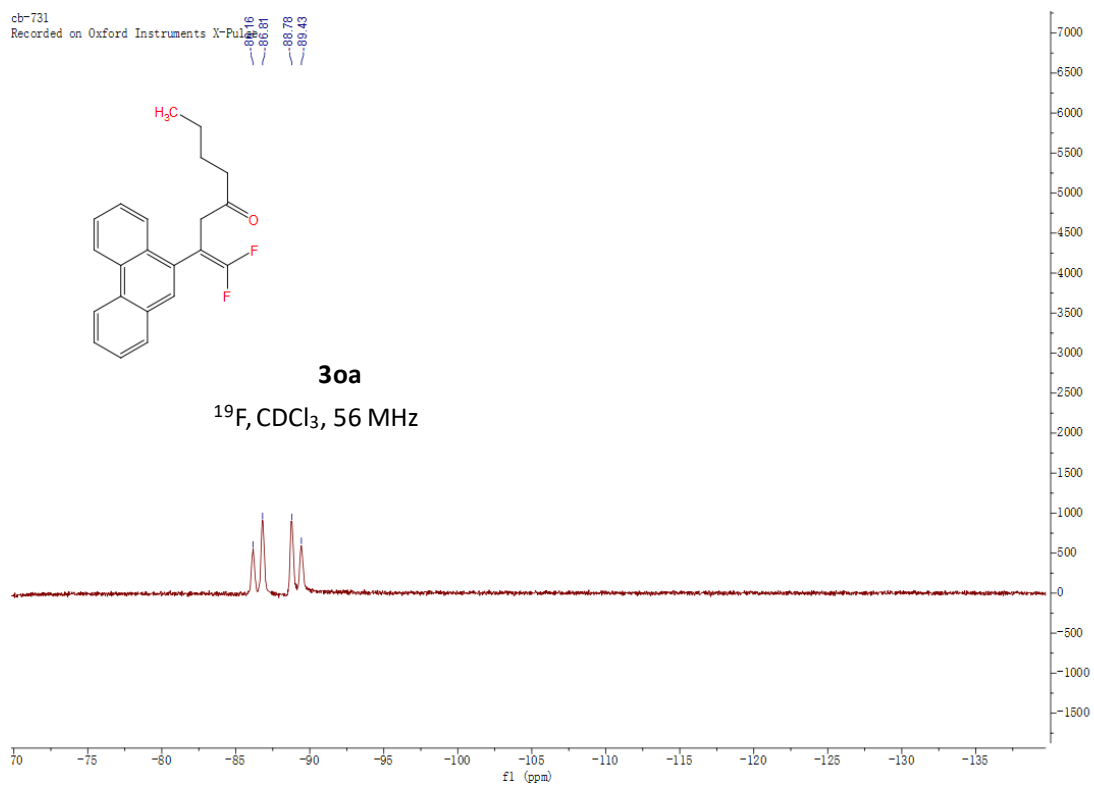

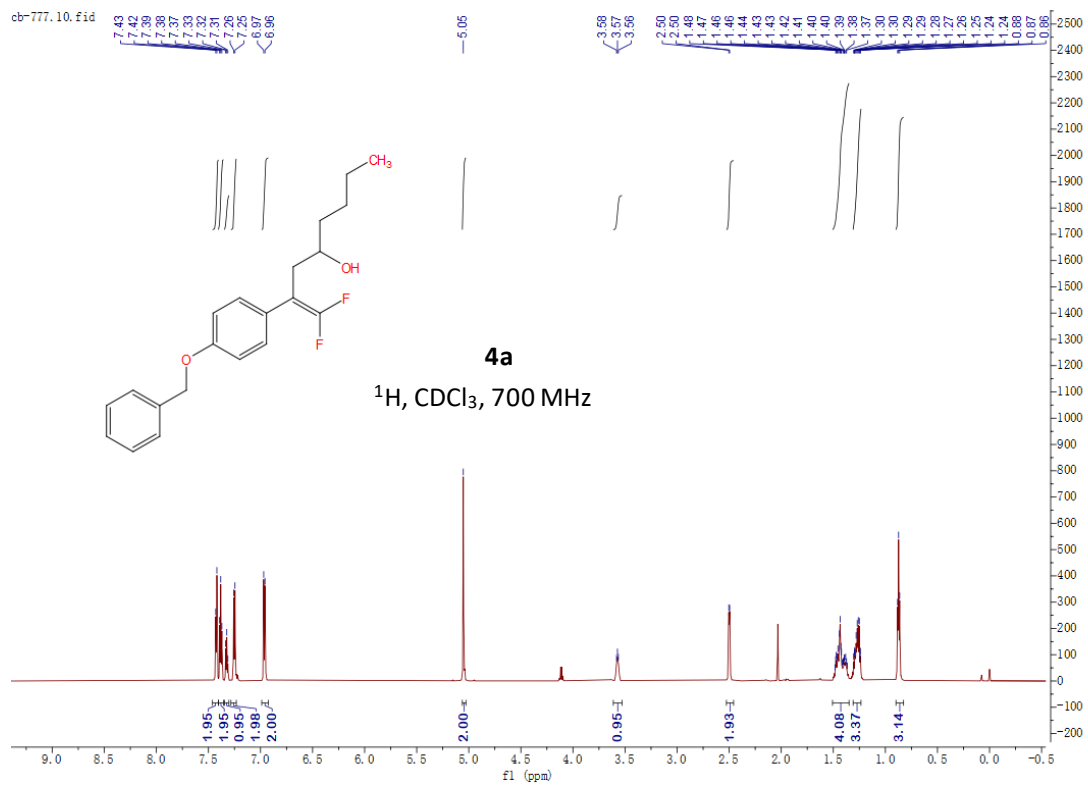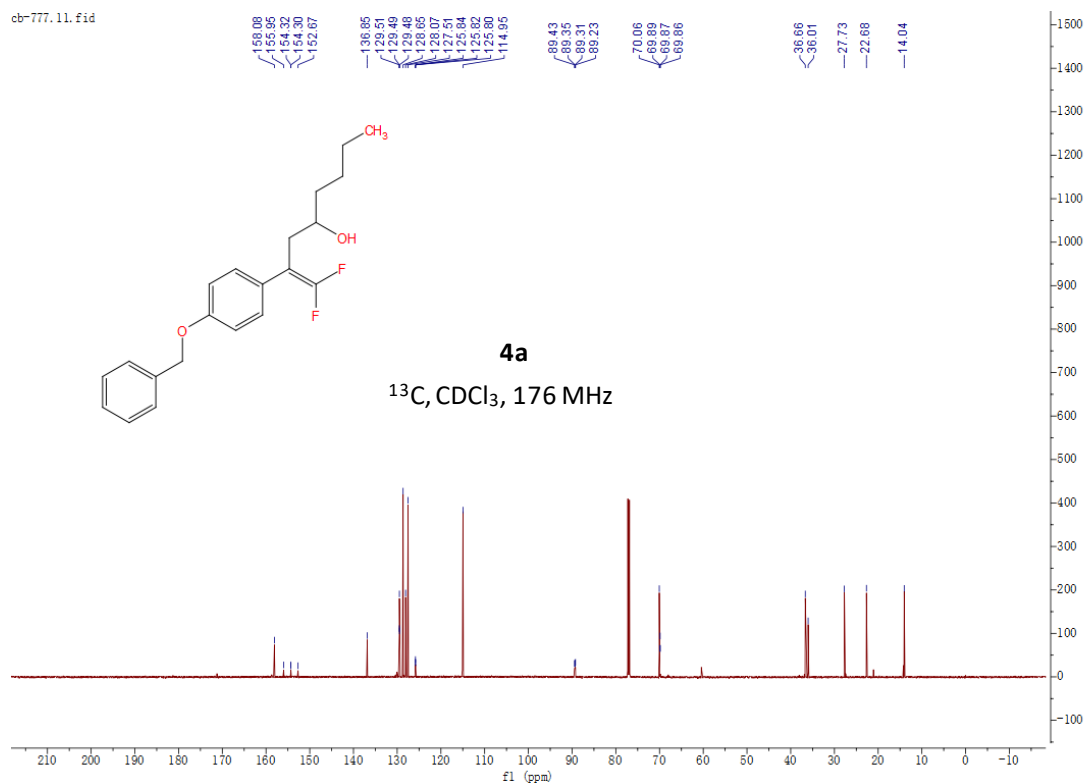



CB-770.11.fid

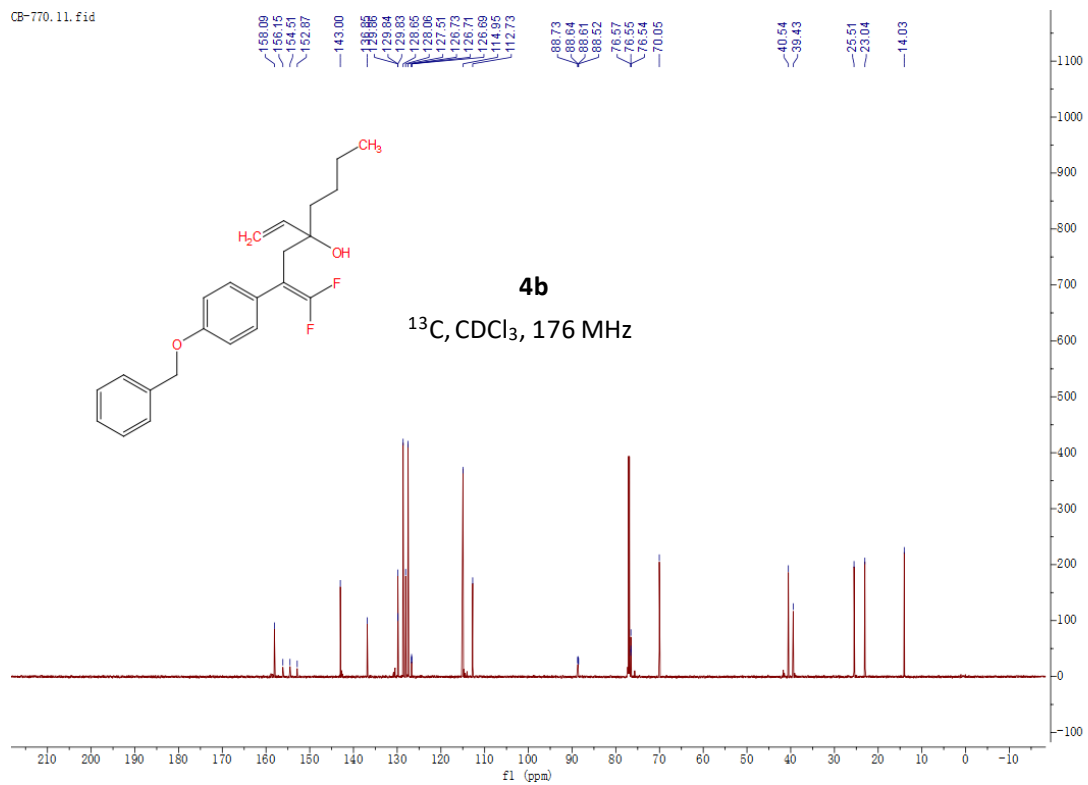

cb-770

Recorded on Oxford Instruments X-Pulse

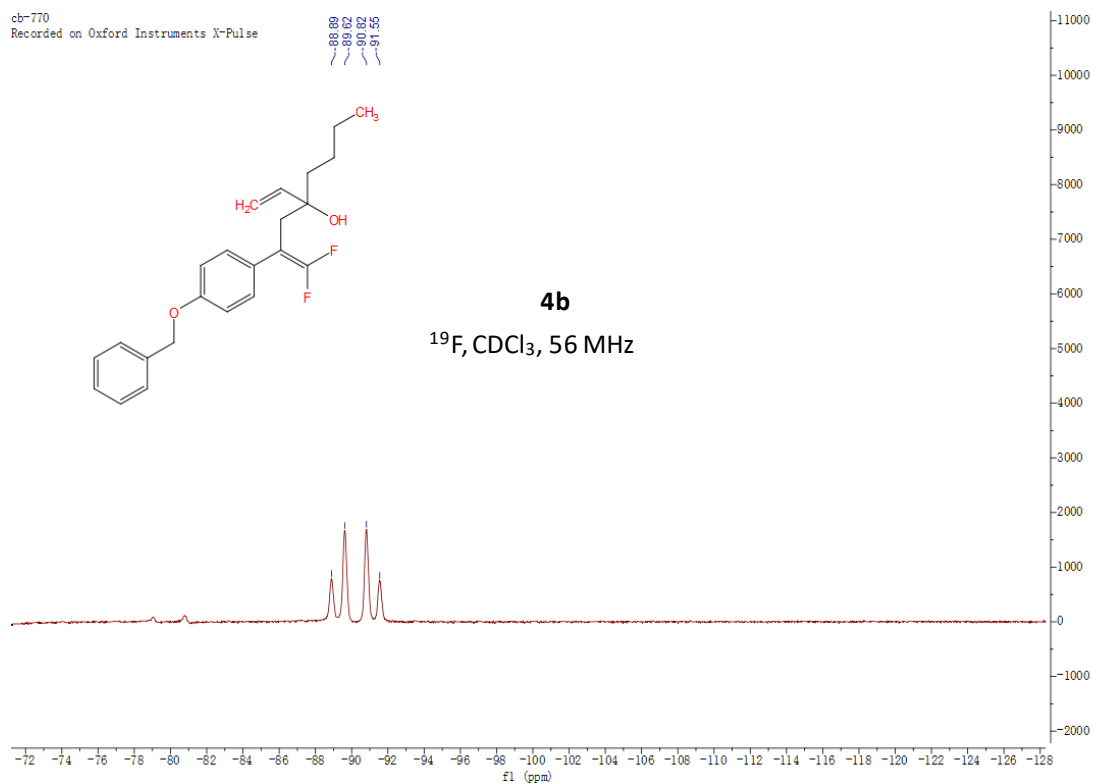

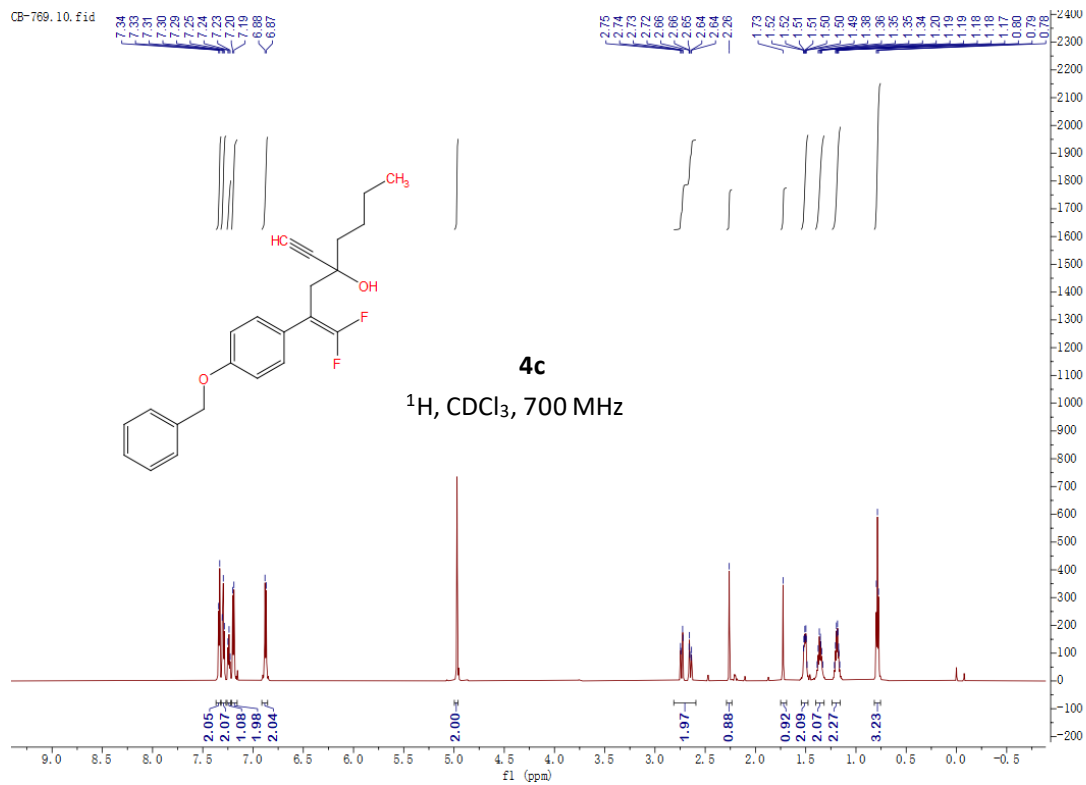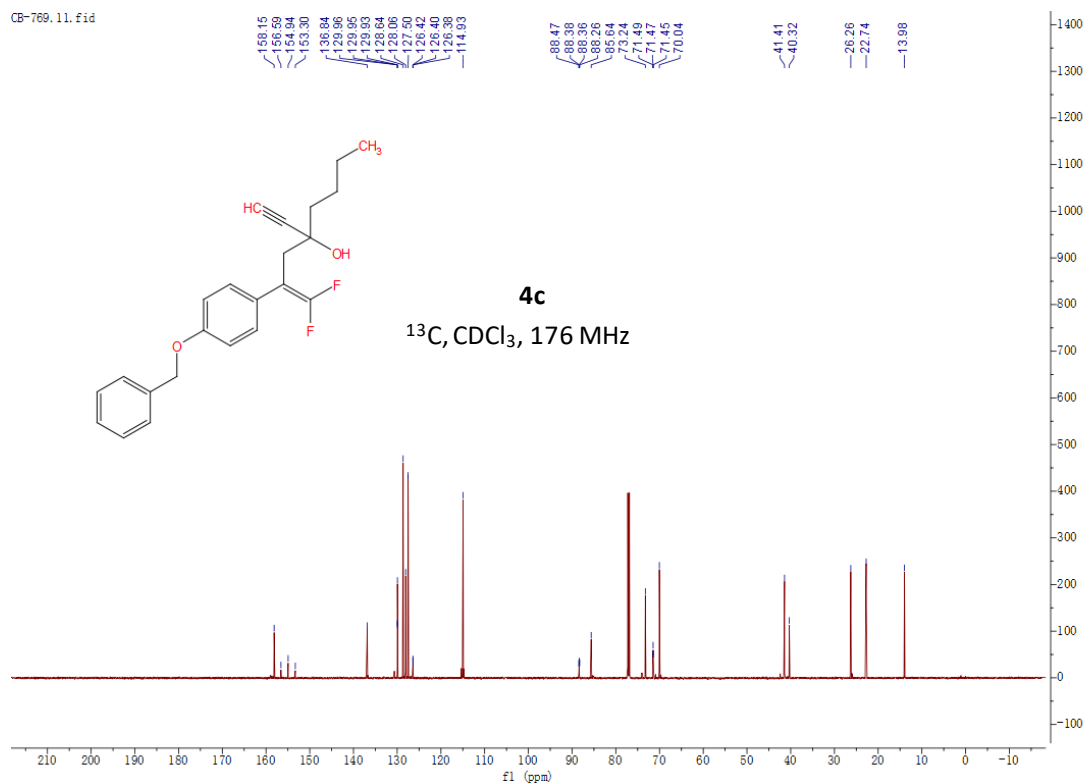

cb-769  
Recorded on Oxford Instruments X-Pulse

88.17  
88.86  
90.53

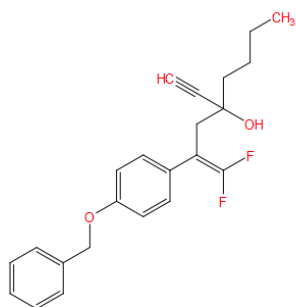

**4c**  
 $^{19}\text{F}$ ,  $\text{CDCl}_3$ , 56 MHz

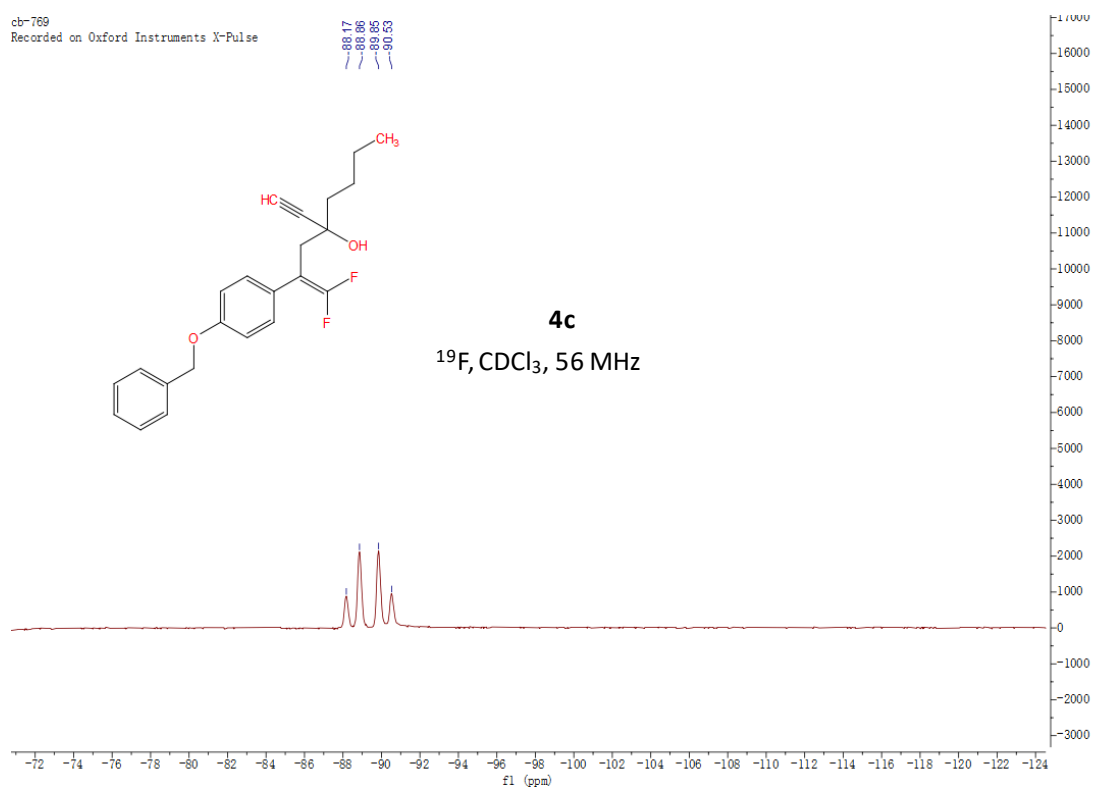

CB-759.10.fid

7.48  
7.47  
7.46  
7.45  
7.44  
7.44  
7.43  
7.32  
7.31  
7.11  
7.10  
6.94  
6.94  
6.93

5.00

2.96  
2.95

1.00

0.83  
0.82  
0.81

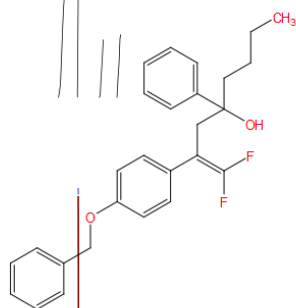

**4d**  
 $^1\text{H}$ ,  $\text{CDCl}_3$ , 700 MHz

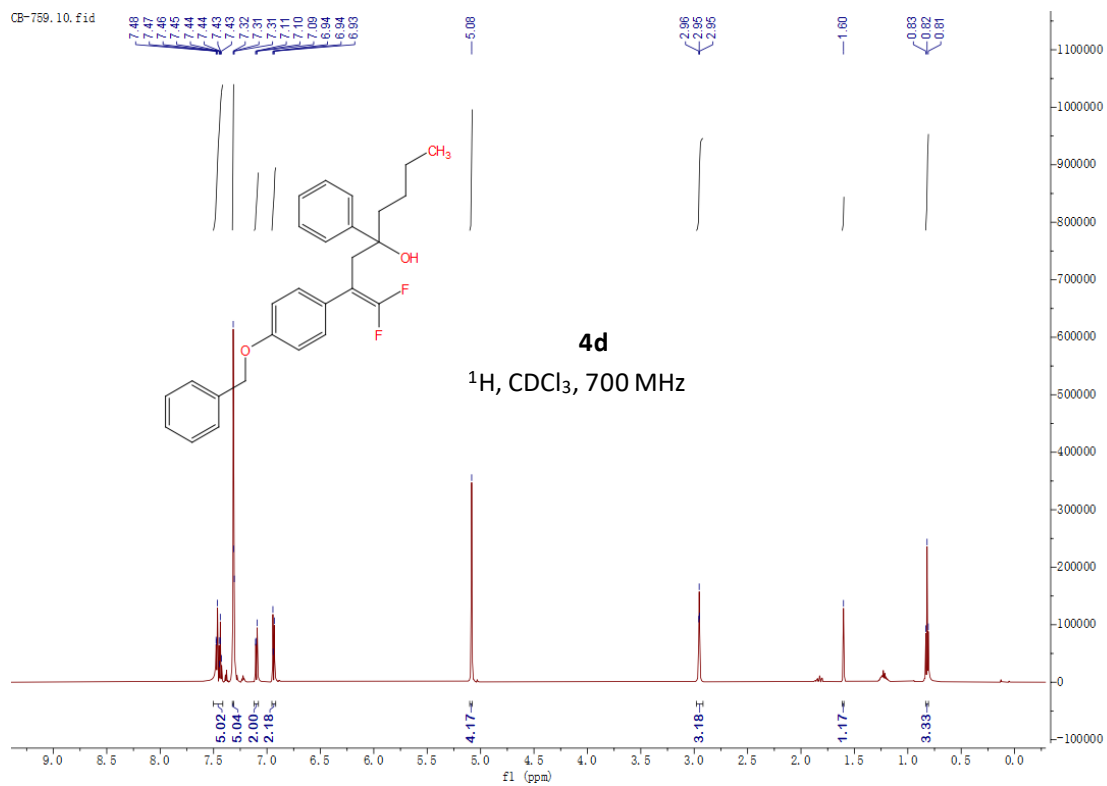



CB-759.11.fid

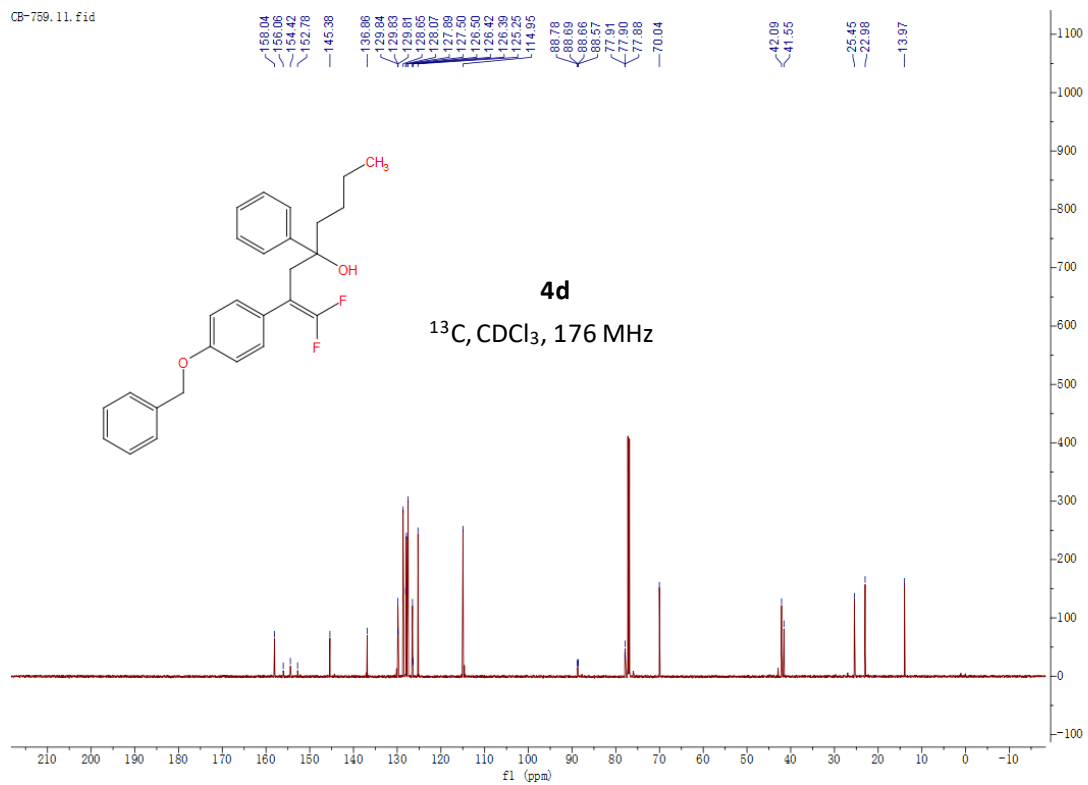

cb-759

Recorded on Oxford Instruments X-Pulse

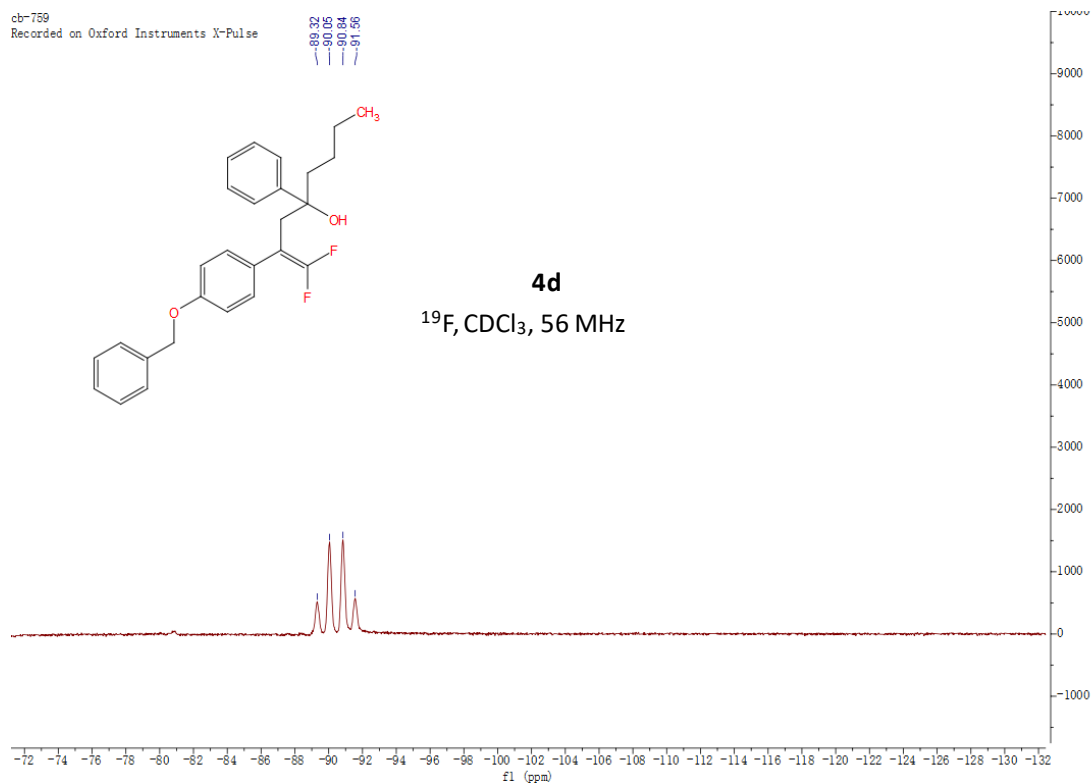

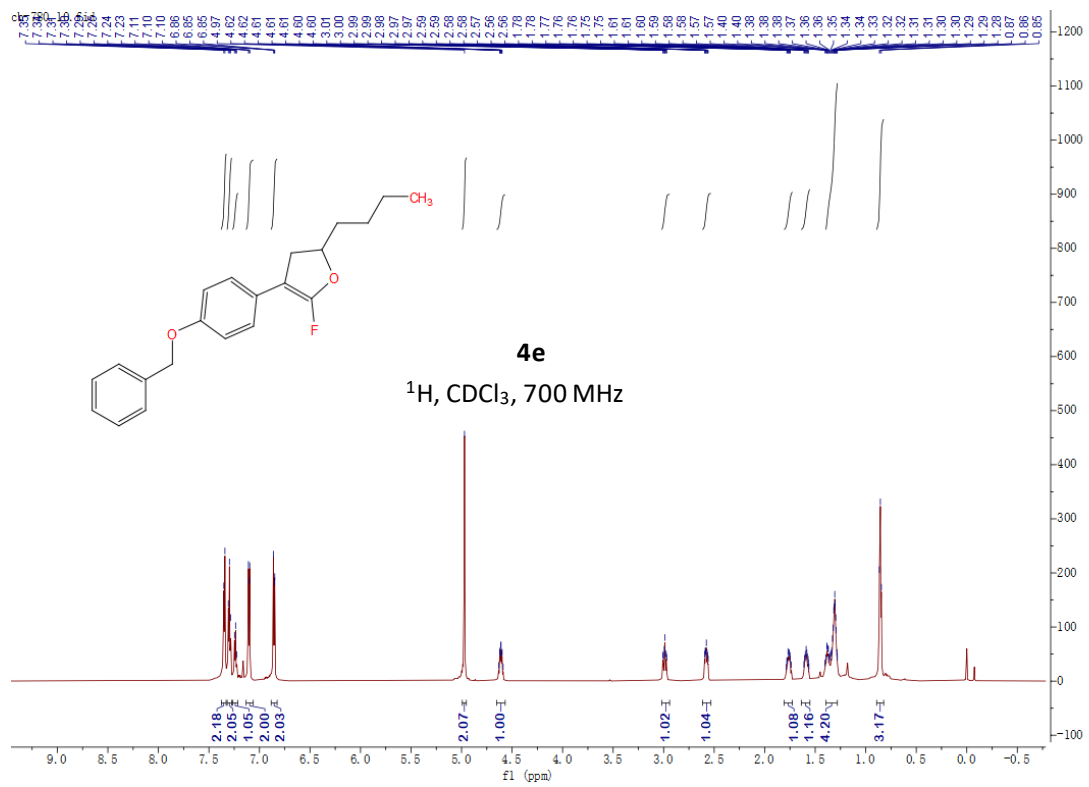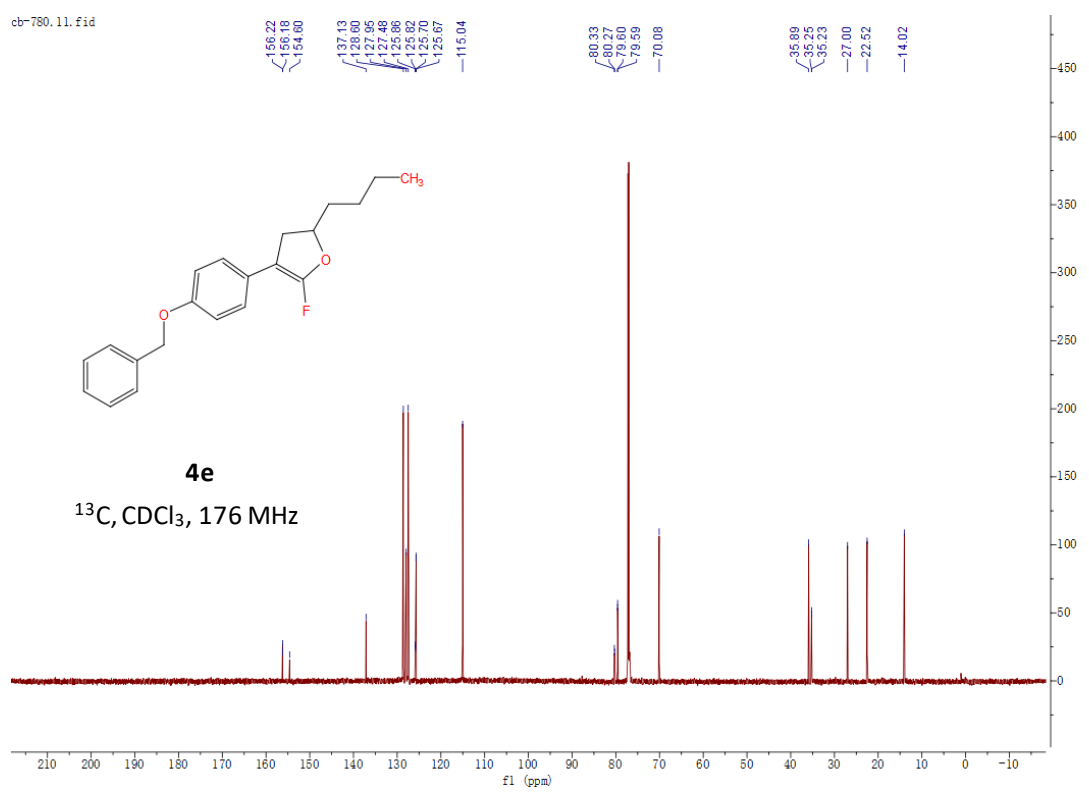



cb-776.21.fid

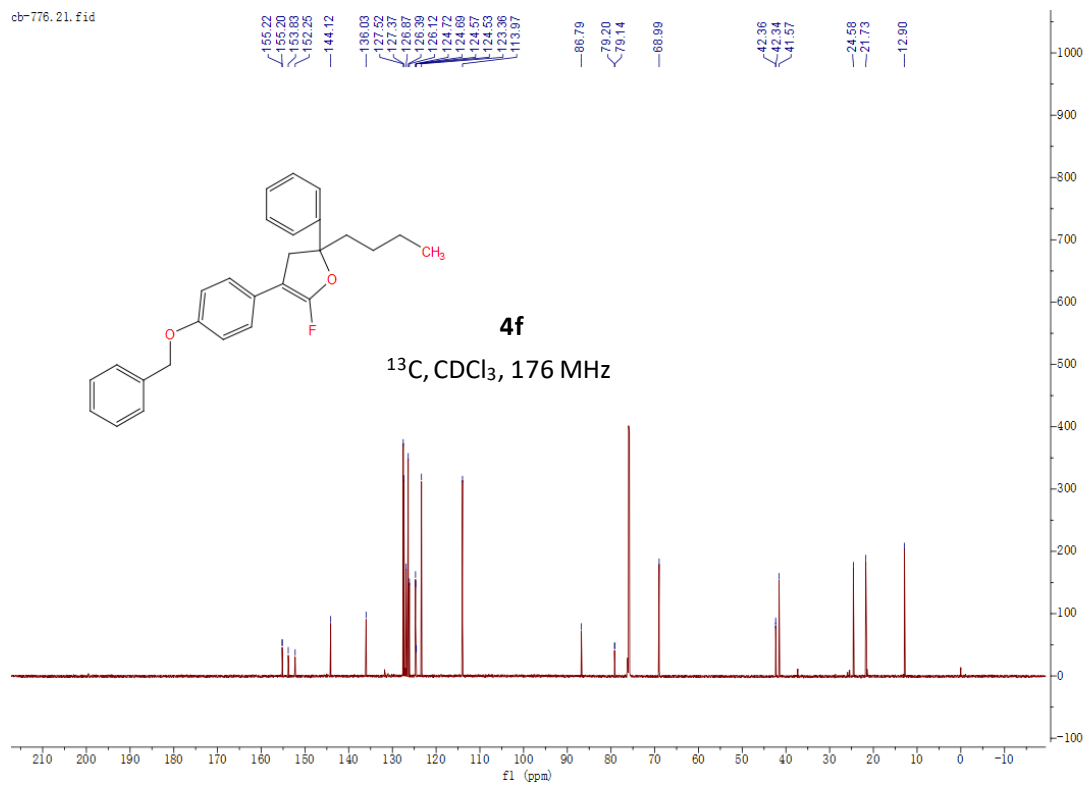

cb-776

Recorded on Oxford Instruments X-Pulse

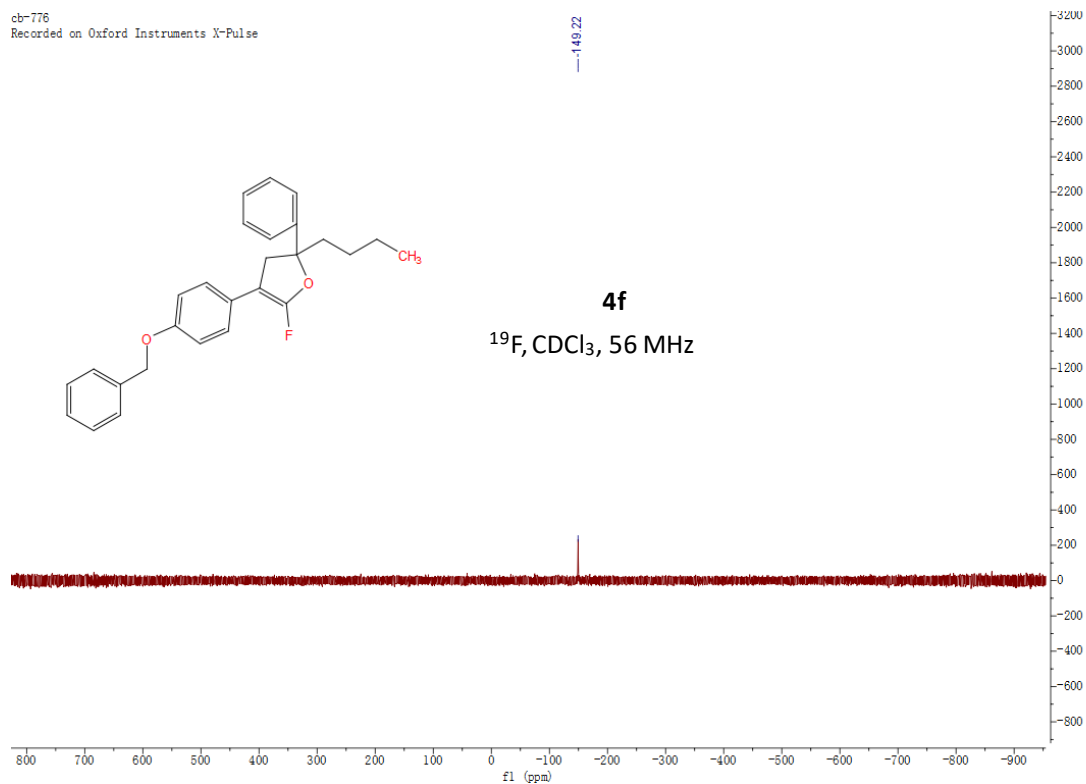

Supplement: d2ob00916a1.pdf [file d2ob00916a1.pdf]
